# Supplementary material for: Regioselective construction of 1,3-diazaheterocycle fused [1,2-a][1,8]naphthyridine derivatives via cascade reaction of quinolines with heterocyclic ketene aminals: a joint experimental–computational approach
Source: Royal Society of Chemistry journal article supplement (doi:10.1039/c3ob41200h), 2013-01-01
Supplement: c3ob41200h.pdf [file c3ob41200h.pdf]

## Electronic Supplementary Information

Regioselective construction of 1,3-diazaheterocycle fused  
[1,2-*a*][1,8]naphthyridine derivatives *via* cascade reaction of  
quinolines with heterocyclic ketene amins: a joint  
experimental–computational approach†

Yi-Chuan Zhang,<sup>‡*a*</sup> Zhi-Cheng Liu,<sup>‡*a,b*</sup> Rui Yang,<sup>*a,b*</sup> Ji-Hong Zhang,<sup>*b*</sup>  
Sheng-Jiao Yan<sup>\**a*</sup> and Jun Lin<sup>\**a*</sup>

<sup>*a*</sup>Key Laboratory of Medicinal Chemistry for Natural Resource (Yunnan University),  
Ministry of Education, School of Chemical Science and Technology, Yunnan University,  
Kunming, 650091, P. R. China.

<sup>*b*</sup>Department of Applied Chemistry, Faculty of Science, Kunming University of Science  
and Technology, Kunming, 650500, P. R. China.

† These authors contributed equally to this paper.

\*E-mail: yansj@ynu.edu.cn, linjun@ynu.edu.cn  
Fax: +86 871 65033215

### Table of Contents

|                                                                                                                        |         |
|------------------------------------------------------------------------------------------------------------------------|---------|
| 1 NMR spectra of compounds <b>3</b> .....                                                                              | S2–S26  |
| 2 Geometries, energies and graphics of frontier molecular orbital for all optimized<br>synthons and intermediates..... | S27–S52 |
| 3 Crystal X-ray structure and packing diagrams of compound <b>3k</b> .....                                             | S53–S57 |
| 4 References and Notes.....                                                                                            | S58     |

### 1 NMR spectra of compounds 3

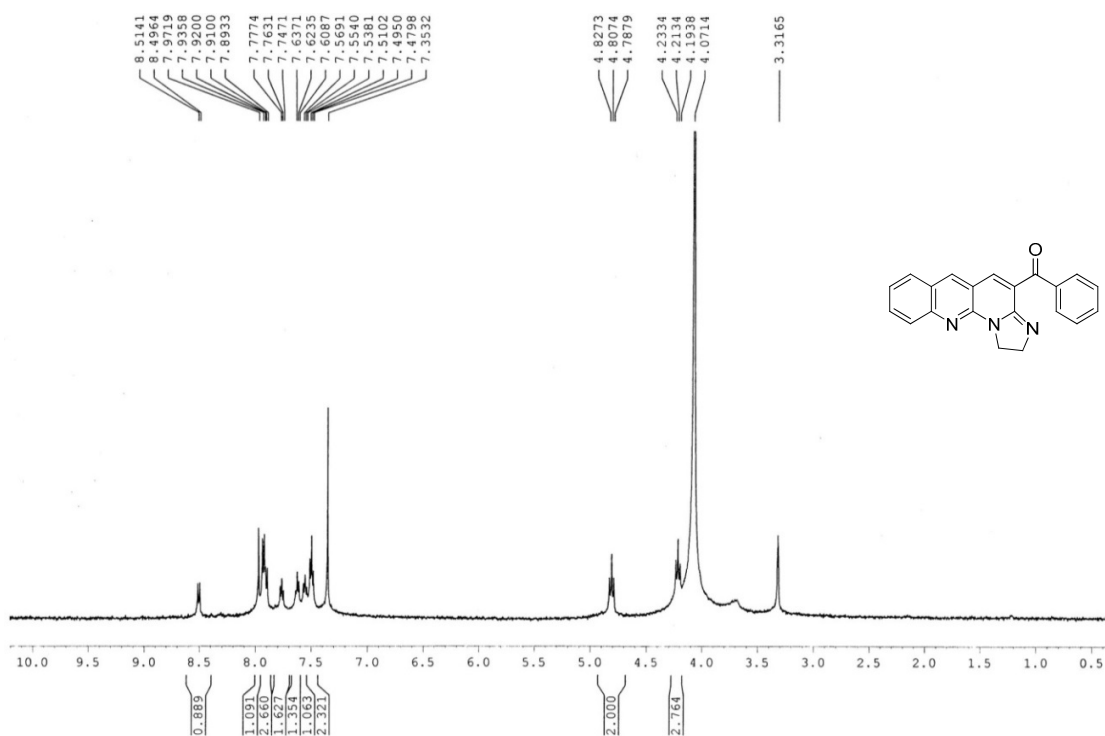

Fig. S1 <sup>1</sup>H NMR spectrum (500 MHz, CD<sub>3</sub>OD+CDCl<sub>3</sub>) of compound 3a

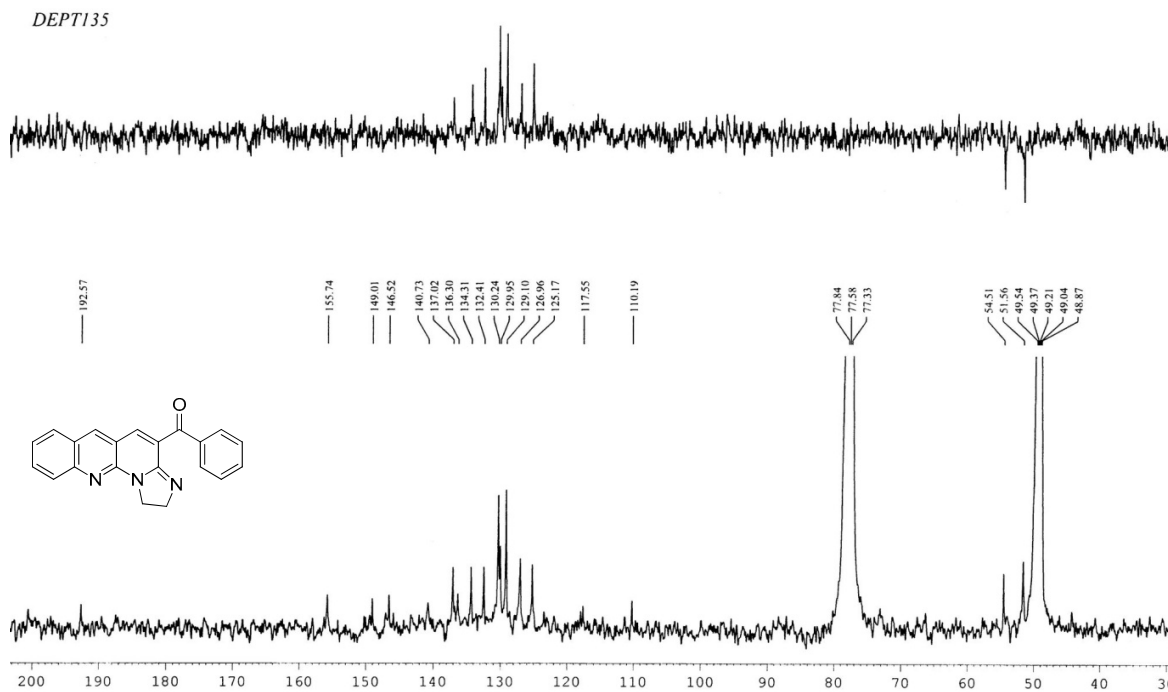

Fig. S2 <sup>13</sup>C NMR spectrum (125 MHz, CD<sub>3</sub>OD+CDCl<sub>3</sub>) of compound 3a

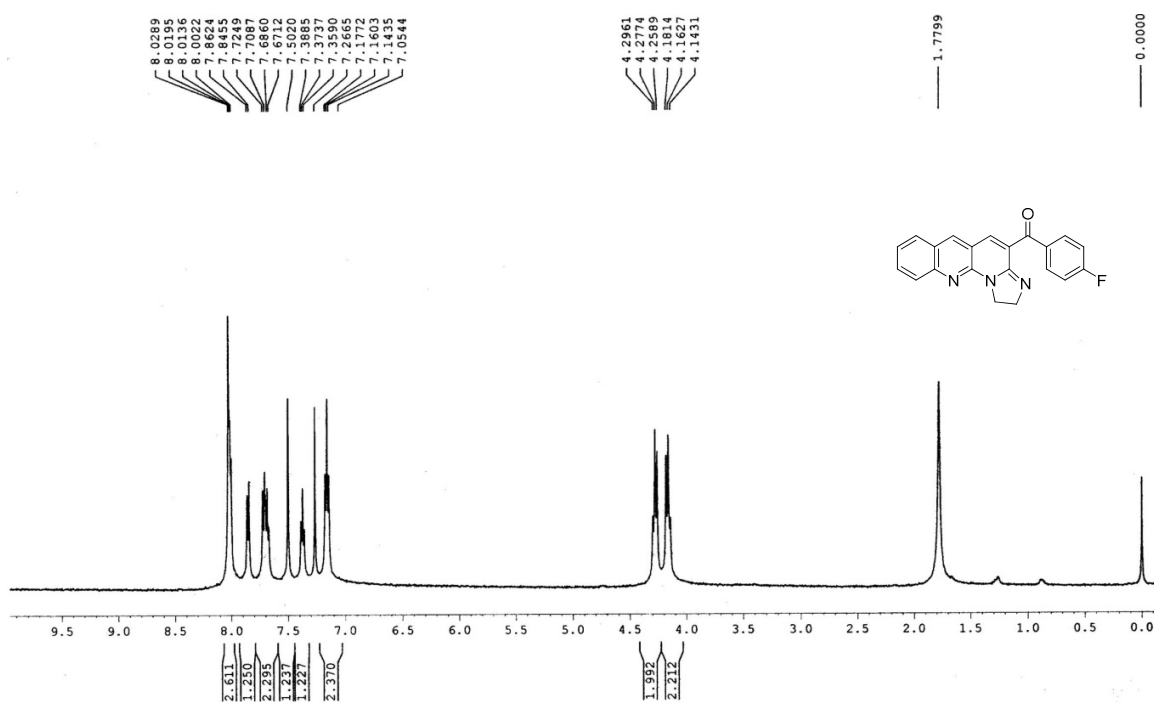

Fig. S3 <sup>1</sup>H NMR spectrum (500 MHz, CDCl<sub>3</sub>) of compound **3b**

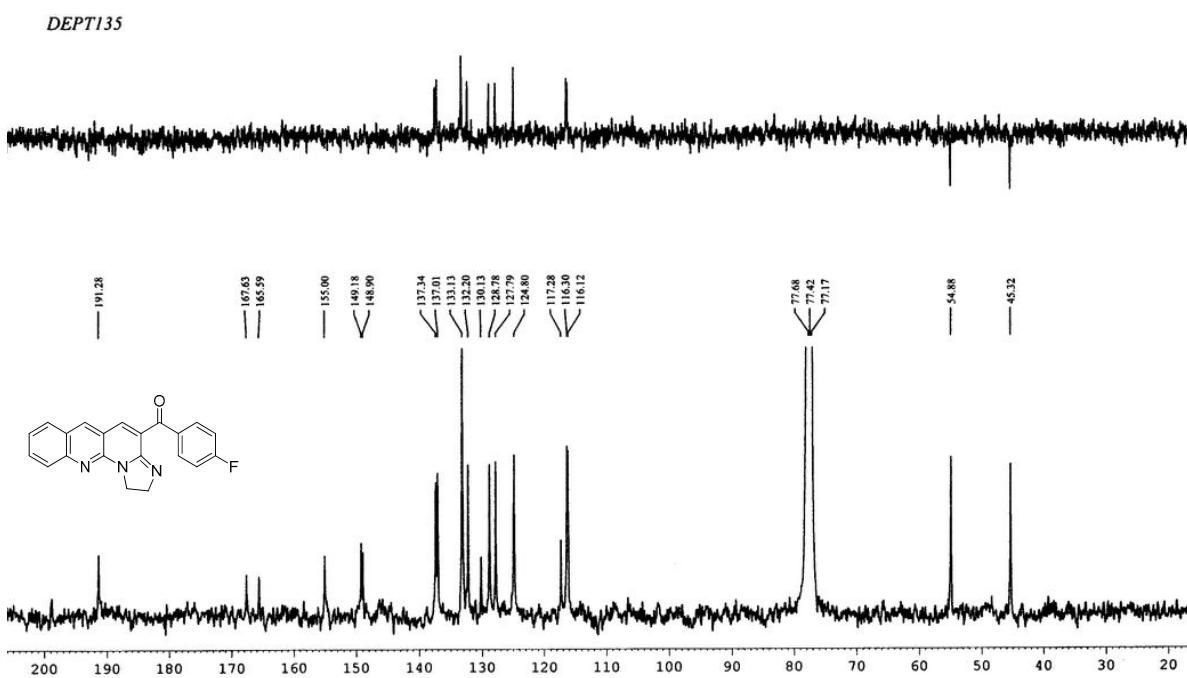

Fig. S4 <sup>13</sup>C NMR spectrum (125 MHz, CDCl<sub>3</sub>) of compound **3b**

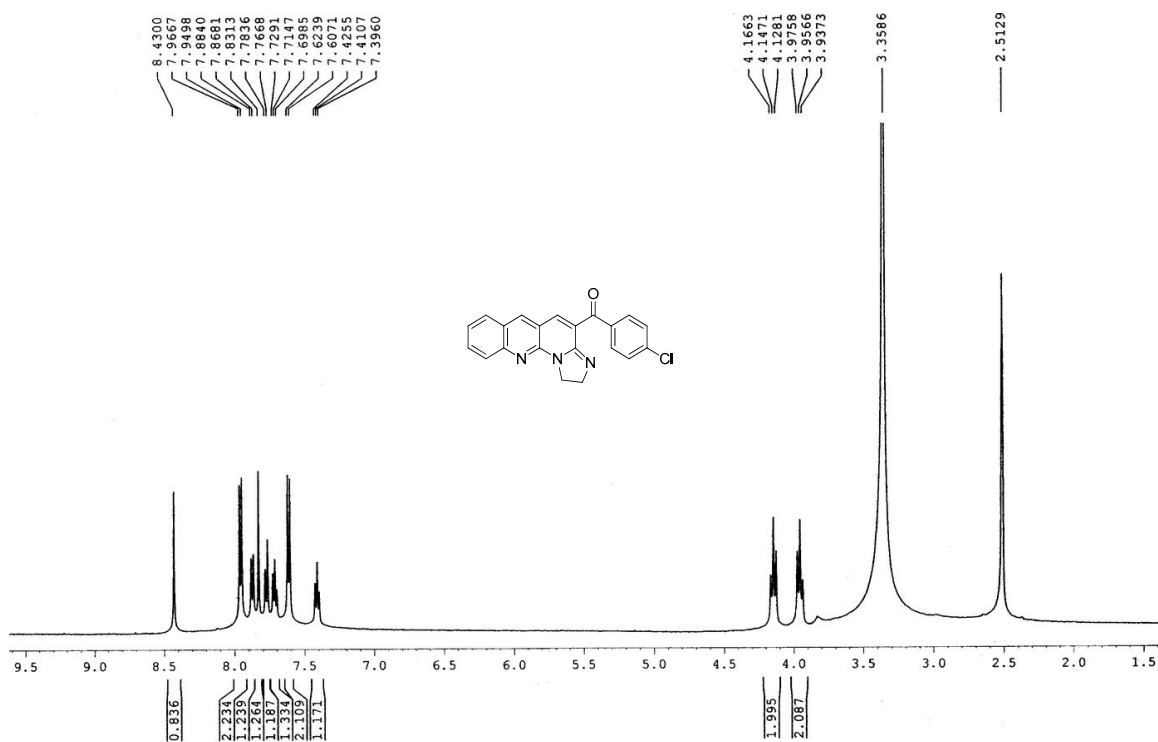

**Fig. S5** <sup>1</sup>H NMR spectrum (500 MHz, DMSO-*d*<sub>6</sub>) of compound **3c**

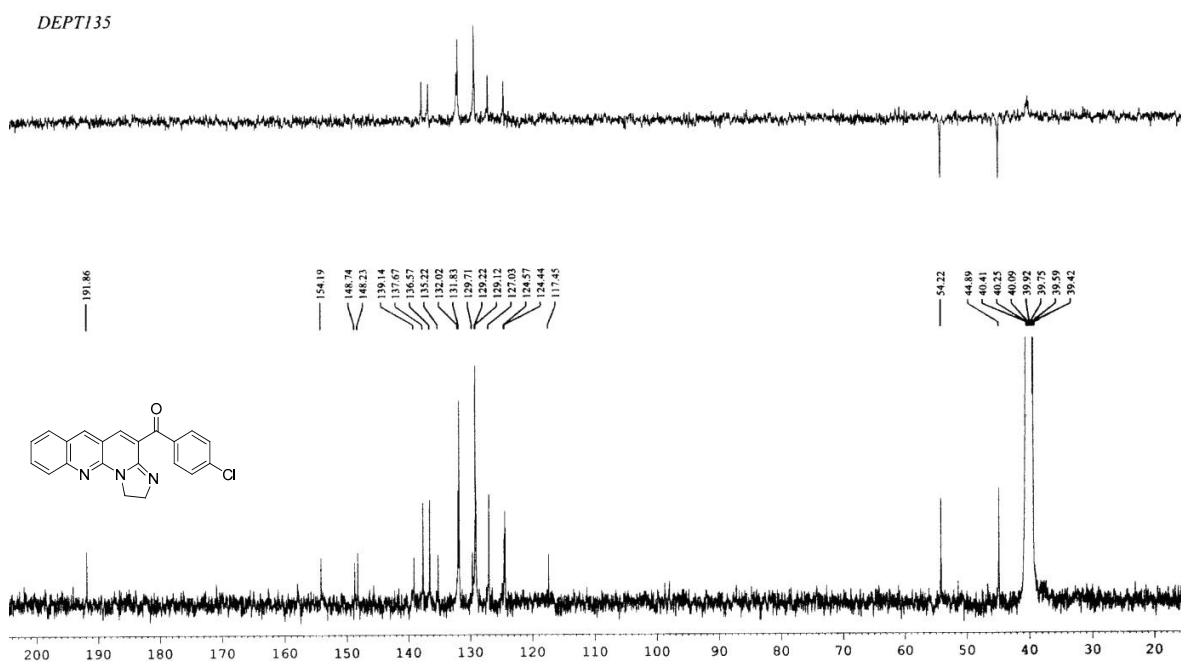

**Fig. S6** <sup>13</sup>C NMR spectrum (125 MHz, DMSO-*d*<sub>6</sub>) of compound **3c**

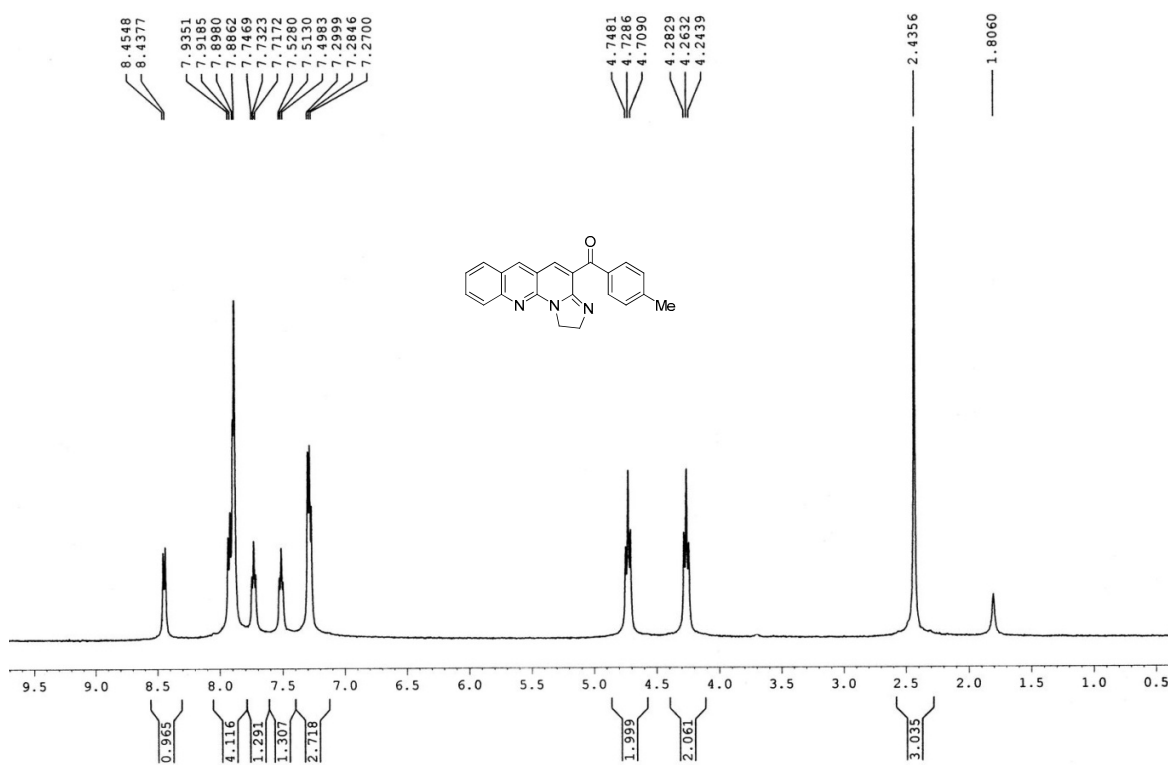

Fig. S7 <sup>1</sup>H NMR spectrum (500 MHz, CDCl<sub>3</sub>) of compound 3d

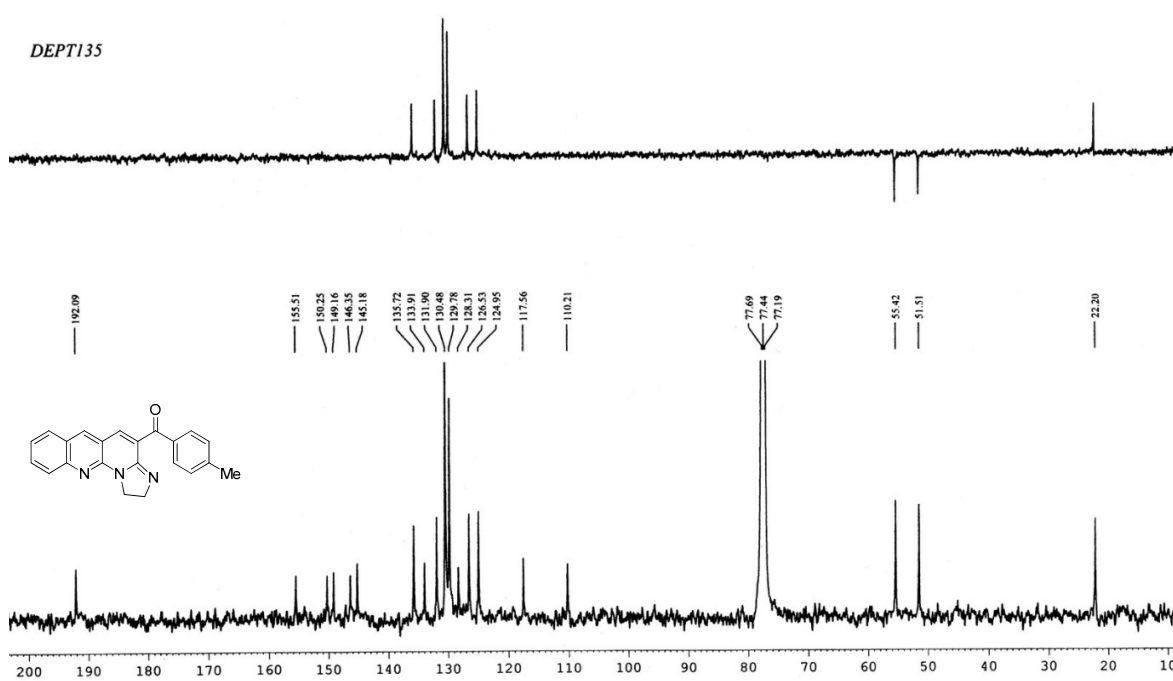

Fig. S8 <sup>13</sup>C NMR spectrum (125 MHz, CDCl<sub>3</sub>) of compound 3d

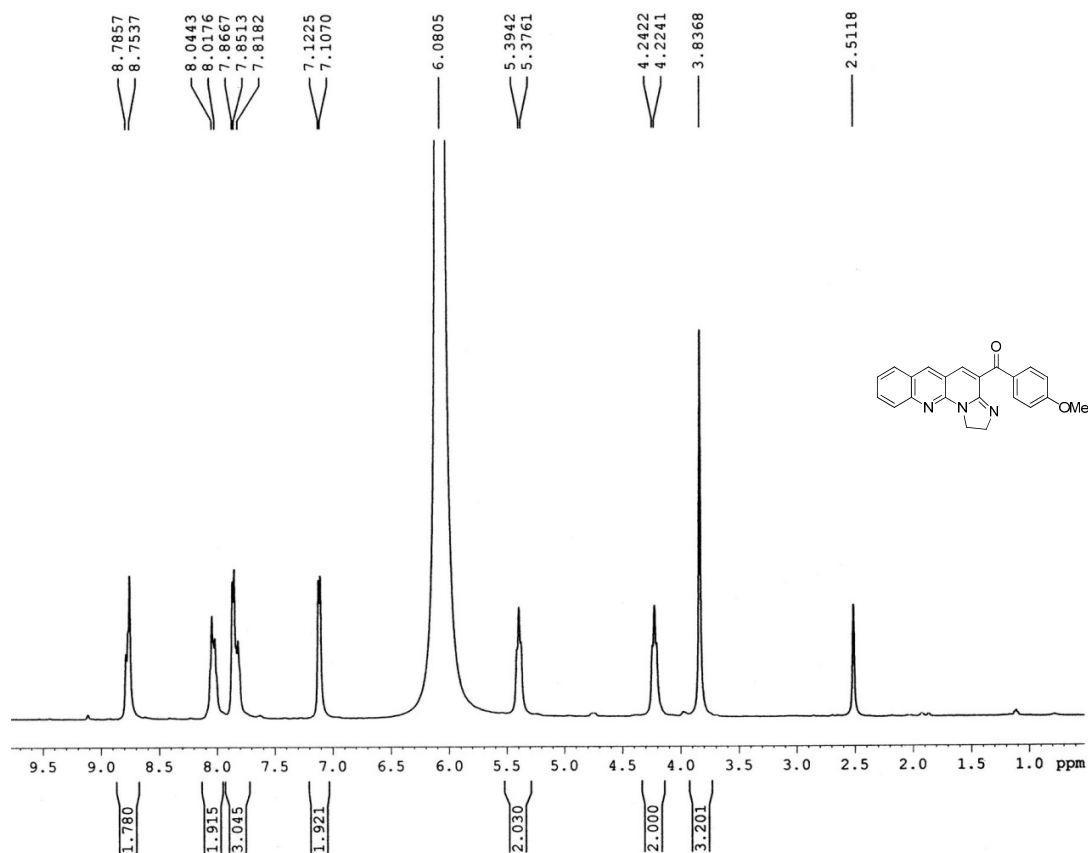

Fig. S9  $^1\text{H}$  NMR spectrum (500 MHz,  $\text{DMSO-}d_6 + \text{HClO}_4$ ) of compound 3e

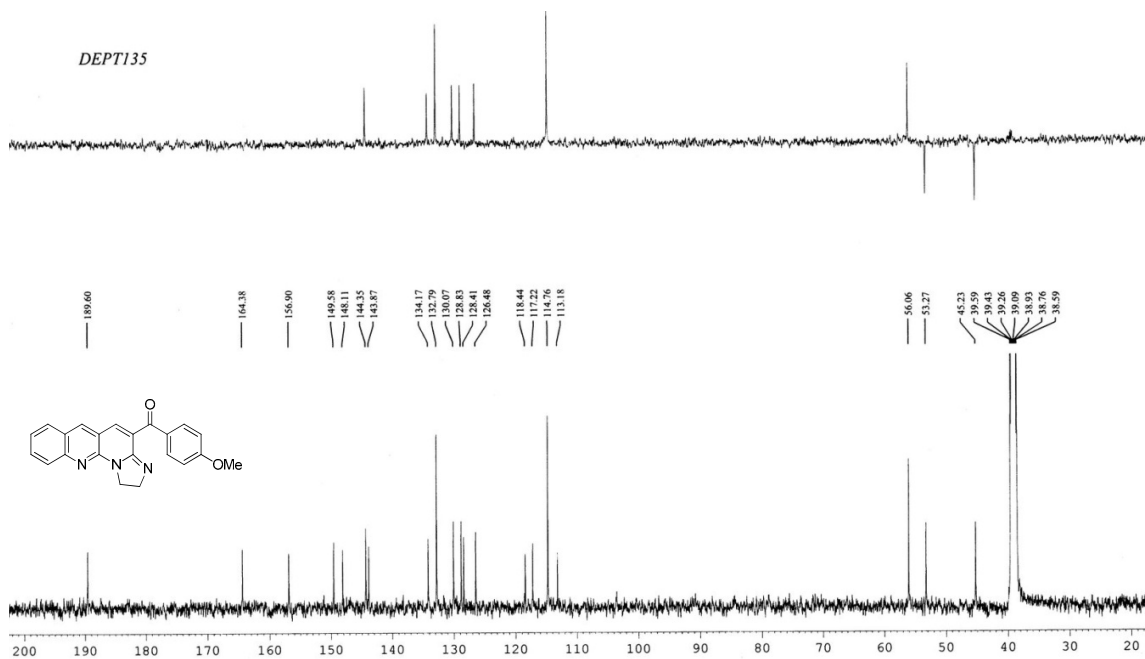

Fig. S10  $^{13}\text{C}$  NMR spectrum (125 MHz,  $\text{DMSO-}d_6 + \text{HClO}_4$ ) of compound 3e

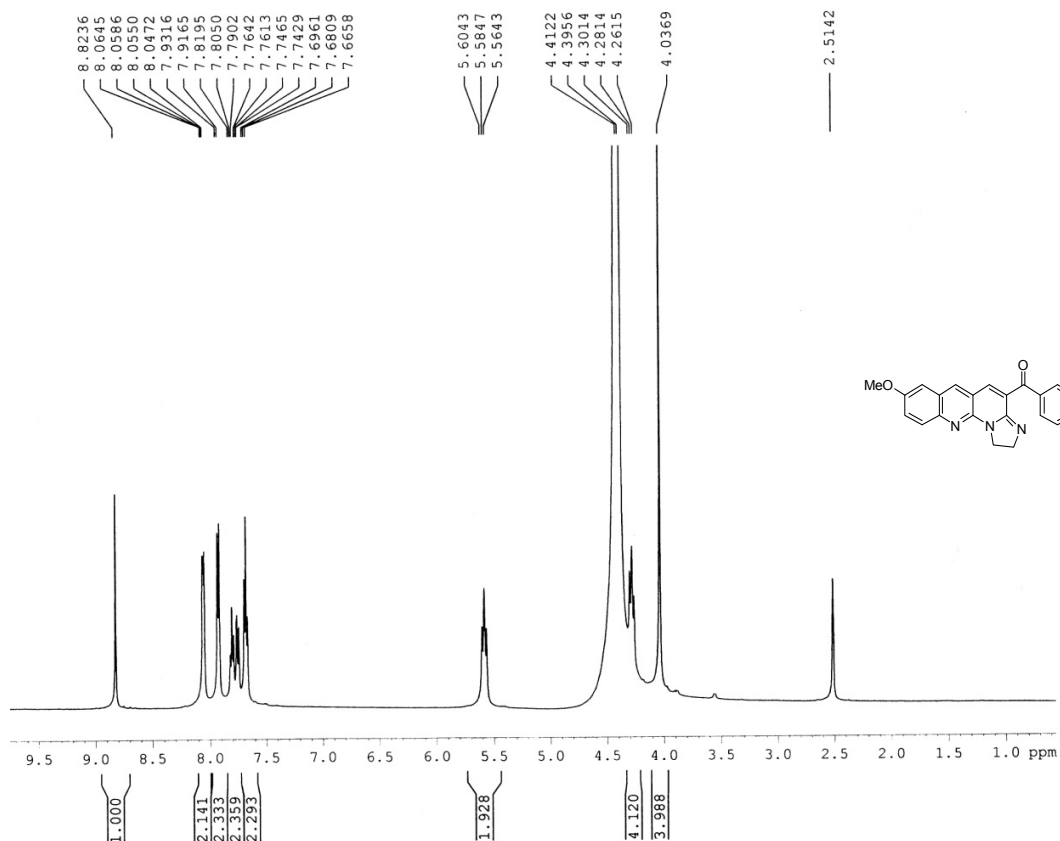

**Fig. S11** <sup>1</sup>H NMR spectrum (500 MHz, DMSO-*d*<sub>6</sub>+HClO<sub>4</sub>) of compound **3f**

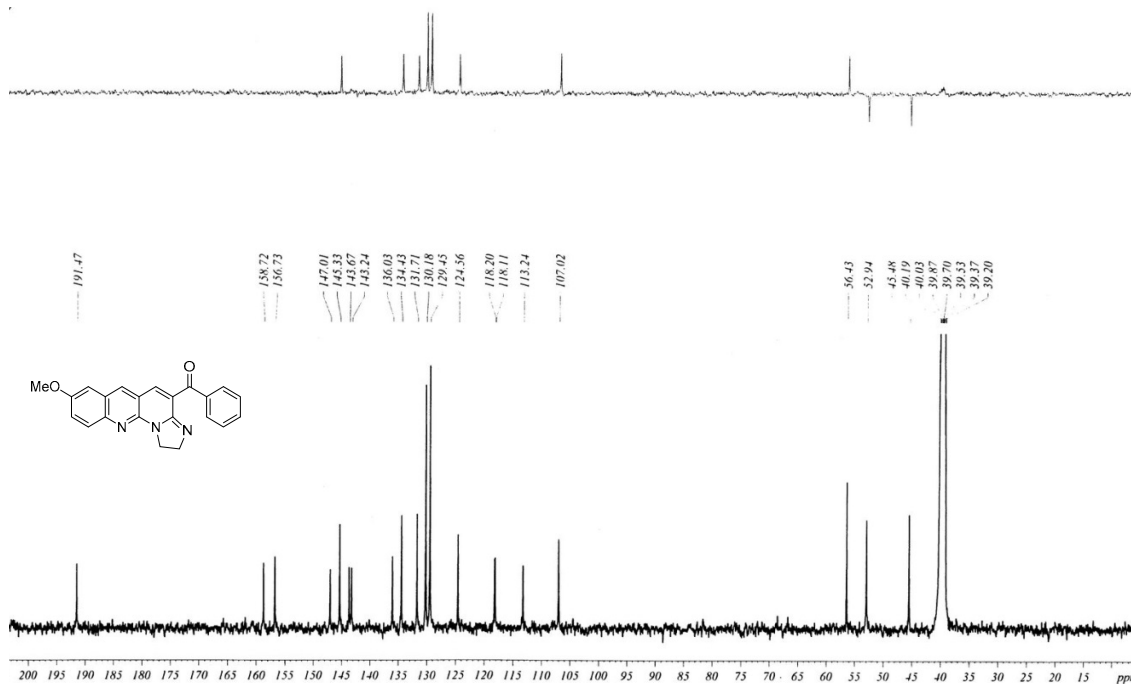

**Fig. S12** <sup>13</sup>C NMR spectrum (125 MHz, DMSO-*d*<sub>6</sub>+HClO<sub>4</sub>) of compound **3f**

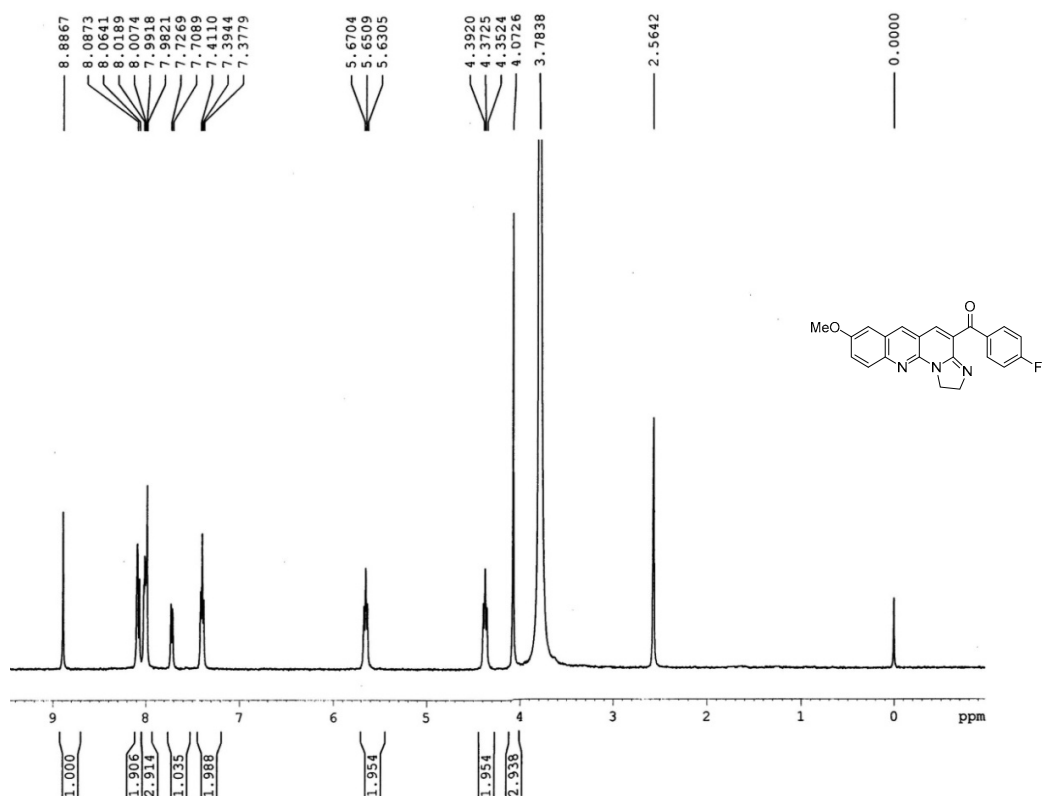

Fig. S13 <sup>1</sup>H NMR spectrum (500 MHz, CDCl<sub>3</sub>+DMSO-*d*<sub>6</sub>+HClO<sub>4</sub>) of compound 3g

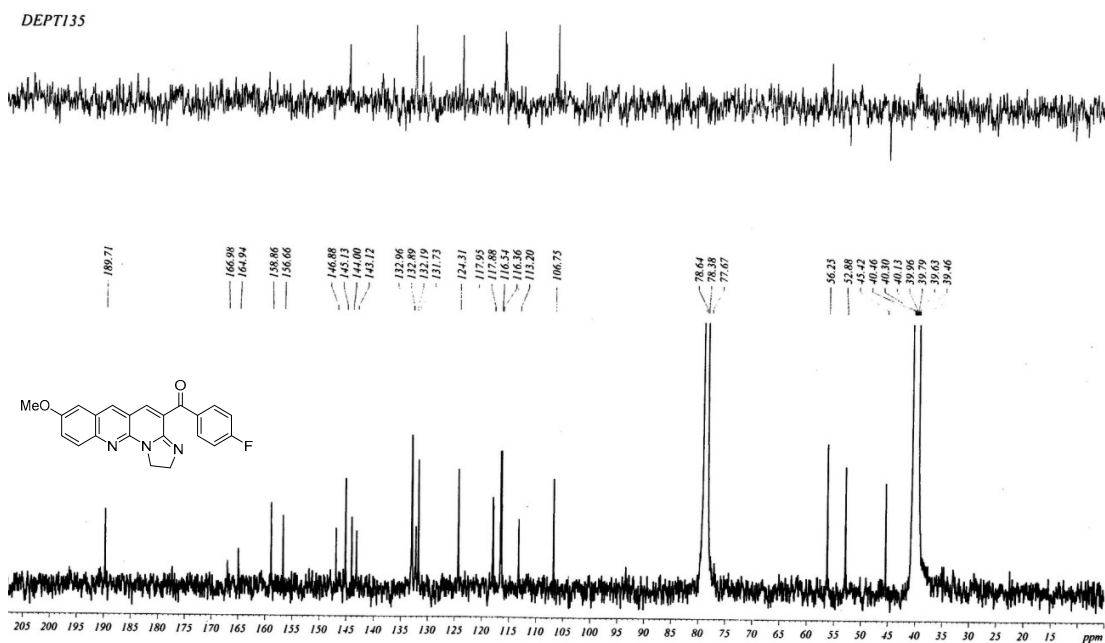

Fig. S14 <sup>13</sup>C NMR spectrum (125 MHz, CDCl<sub>3</sub>+DMSO-*d*<sub>6</sub>+HClO<sub>4</sub>) of compound 3g



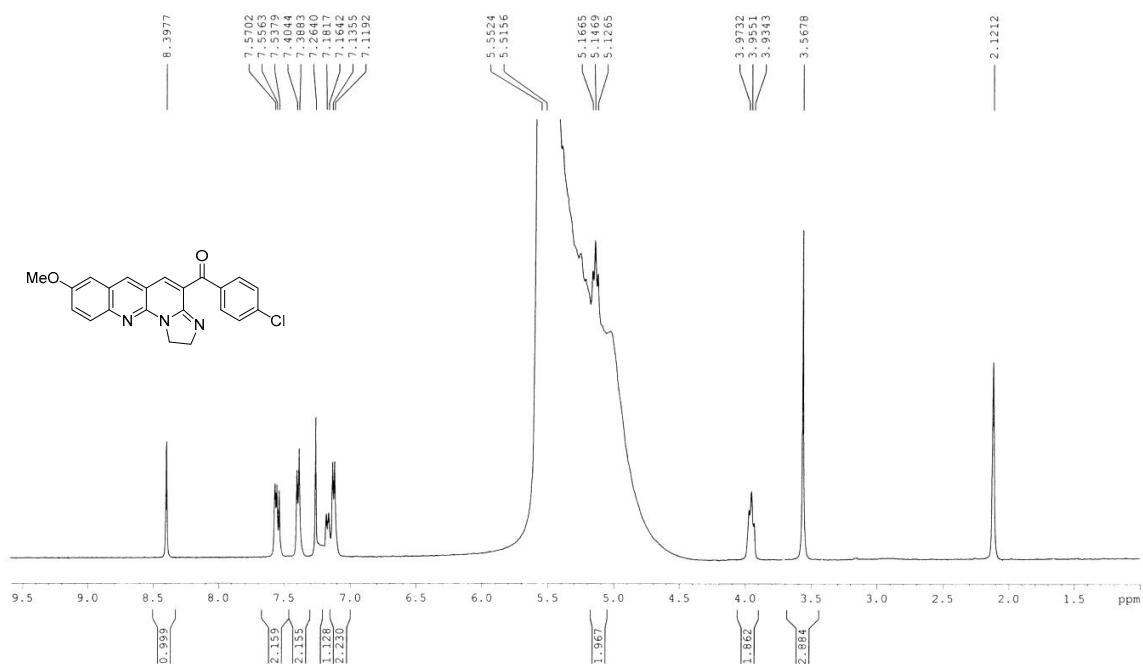

**Fig. S15** <sup>1</sup>H NMR spectrum (500 MHz, CDCl<sub>3</sub>+DMSO-*d*<sub>6</sub>+HClO<sub>4</sub>) of compound **3h**

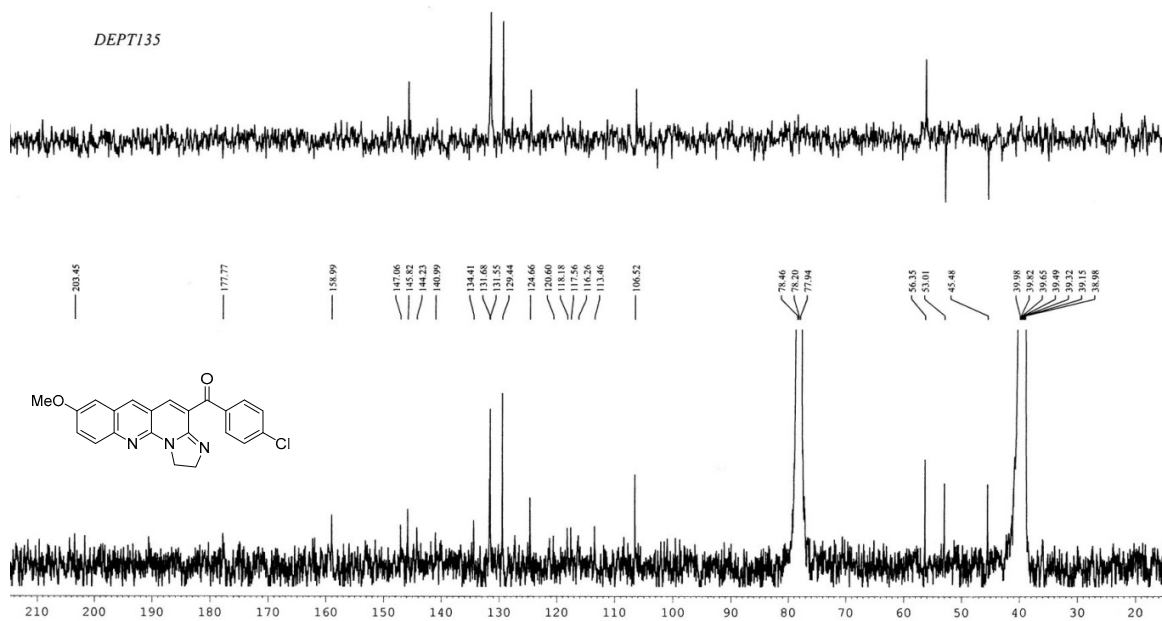

**Fig. S16** <sup>13</sup>C NMR spectrum (125 MHz, CDCl<sub>3</sub>+DMSO-*d*<sub>6</sub>+HClO<sub>4</sub>) of compound **3h**

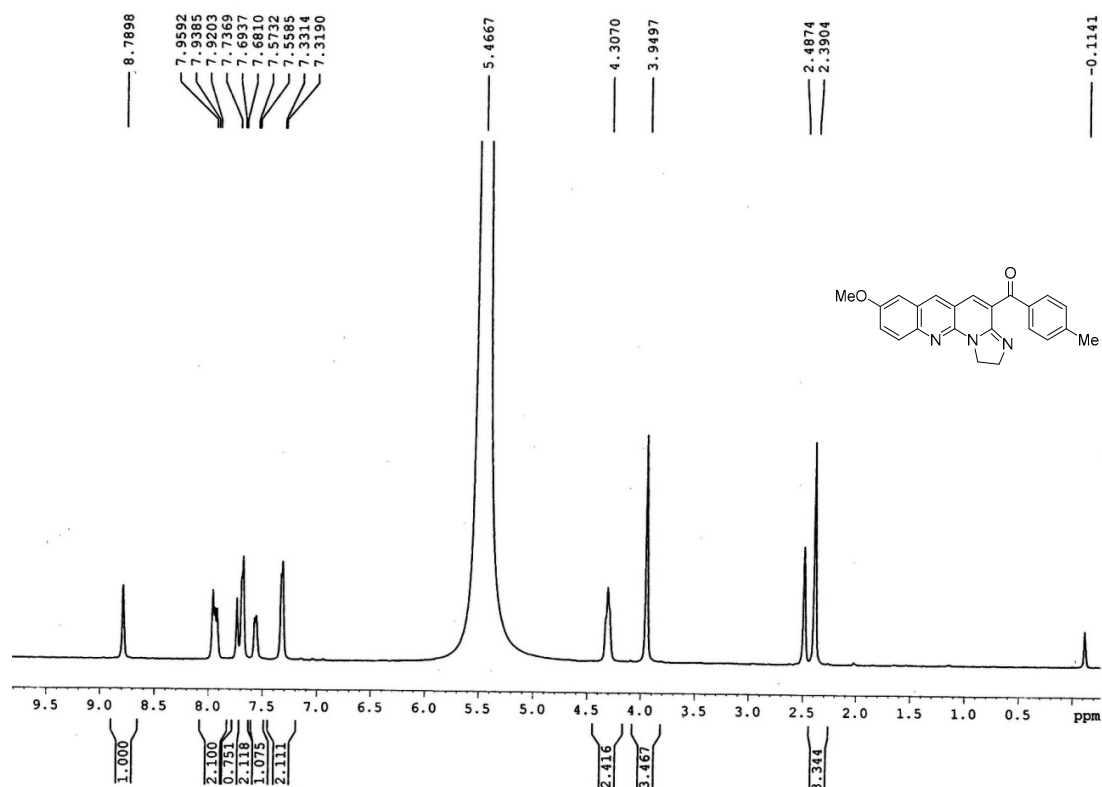

**Fig. S17** <sup>1</sup>H NMR spectrum (500 MHz, CDCl<sub>3</sub>+DMSO-*d*<sub>6</sub>+HClO<sub>4</sub>) of compound **3i**

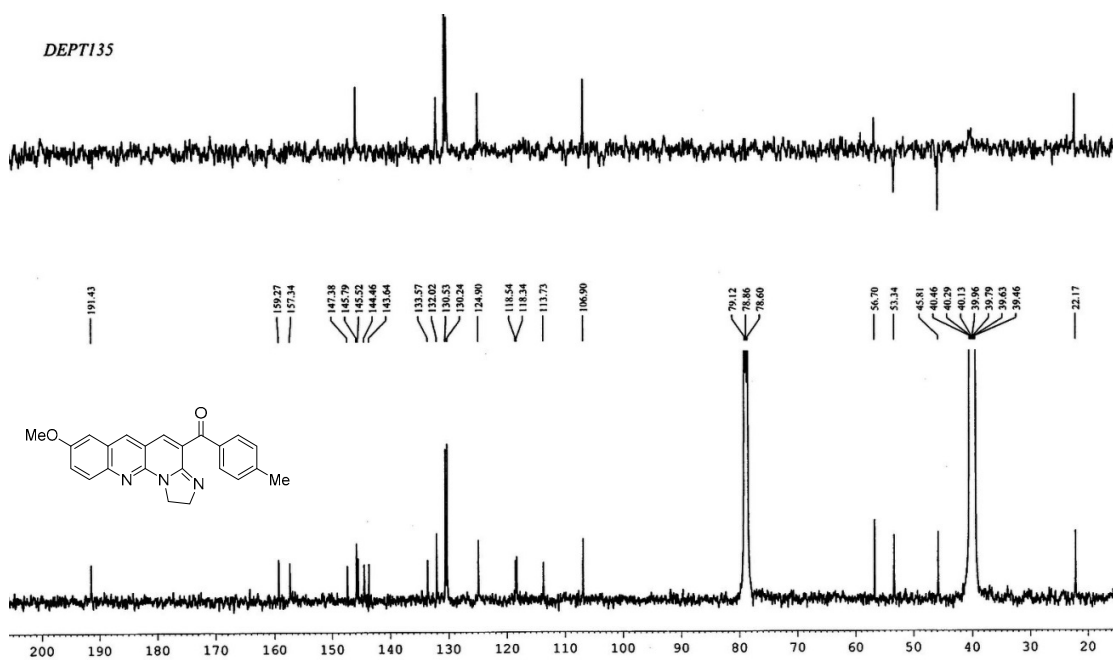

**Fig. S18** <sup>13</sup>C NMR spectrum (125 MHz, CDCl<sub>3</sub>+DMSO-*d*<sub>6</sub>+HClO<sub>4</sub>) of compound **3i**

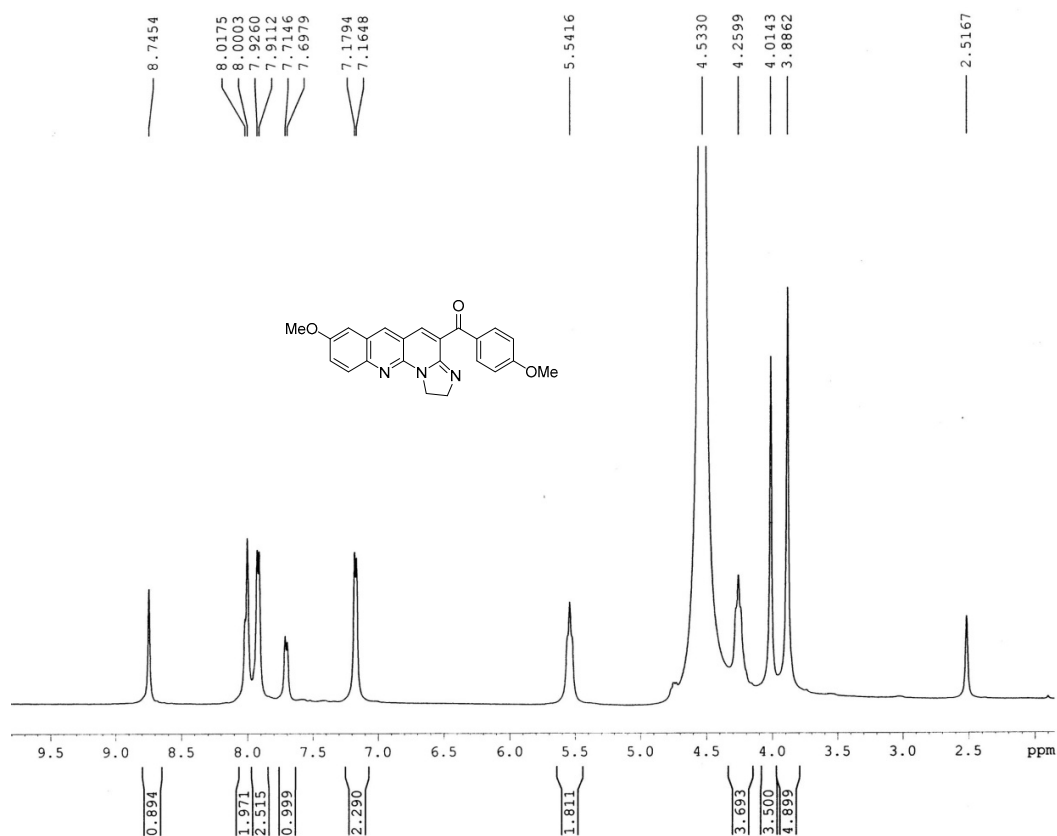

Fig. S19  $^1\text{H}$  NMR spectrum (500 MHz,  $\text{DMSO-}d_6 + \text{HClO}_4$ ) of compound 3j

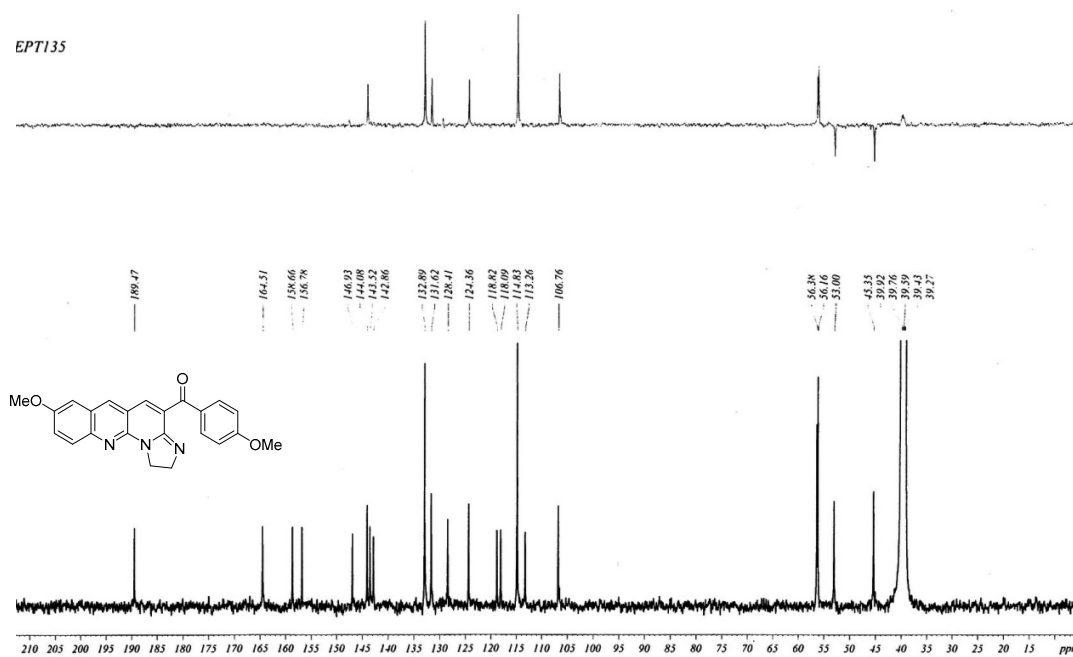

Fig. S20  $^{13}\text{C}$  NMR spectrum (125 MHz,  $\text{DMSO-}d_6 + \text{HClO}_4$ ) of compound 3j

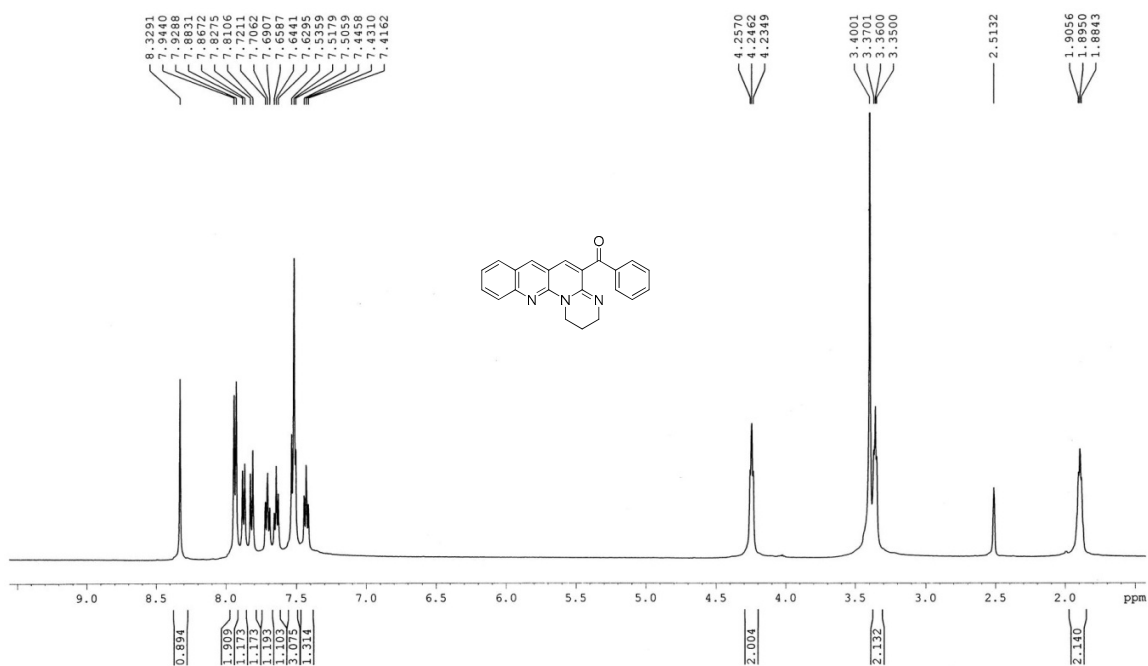

Fig. S21  $^1\text{H}$  NMR spectrum (500 MHz,  $\text{DMSO-}d_6$ ) of compound 3k

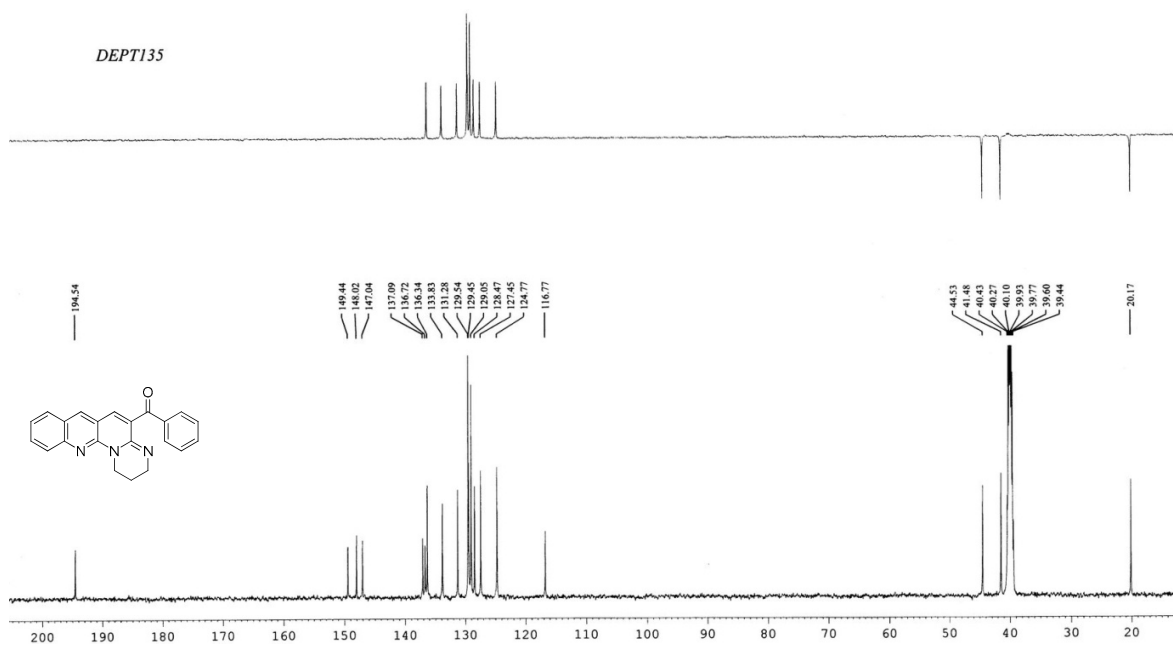

Fig. S22  $^{13}\text{C}$  NMR spectrum (125 MHz,  $\text{DMSO-}d_6$ ) of compound 3k

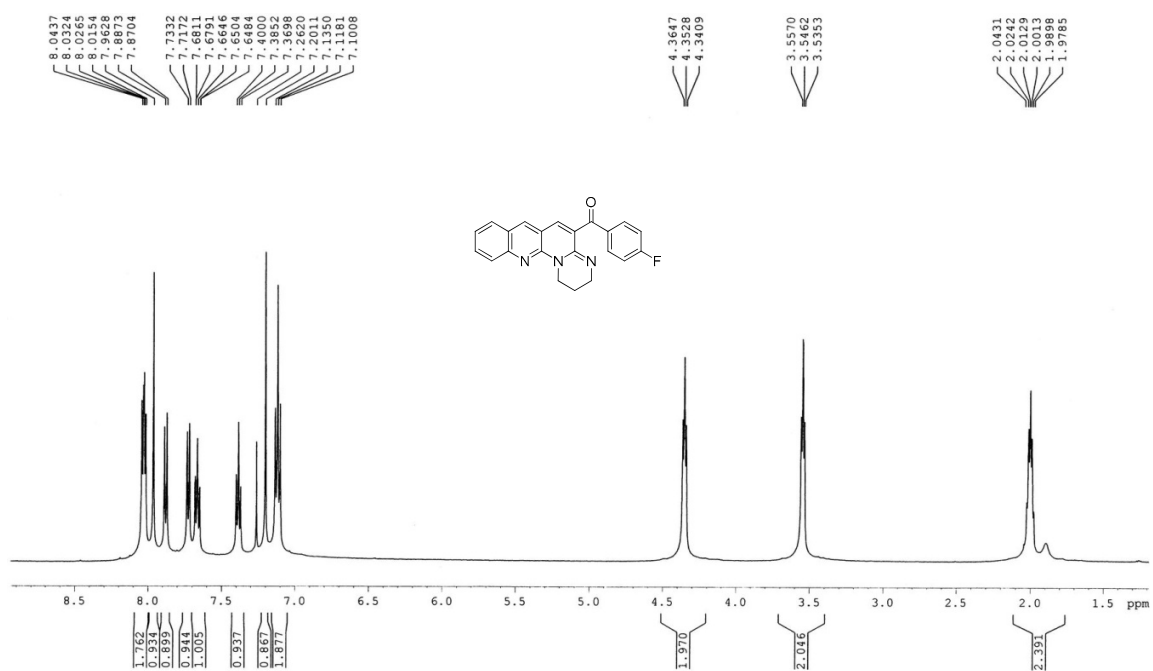

Fig. S23 <sup>1</sup>H NMR spectrum (500 MHz, CDCl<sub>3</sub>) of compound 31

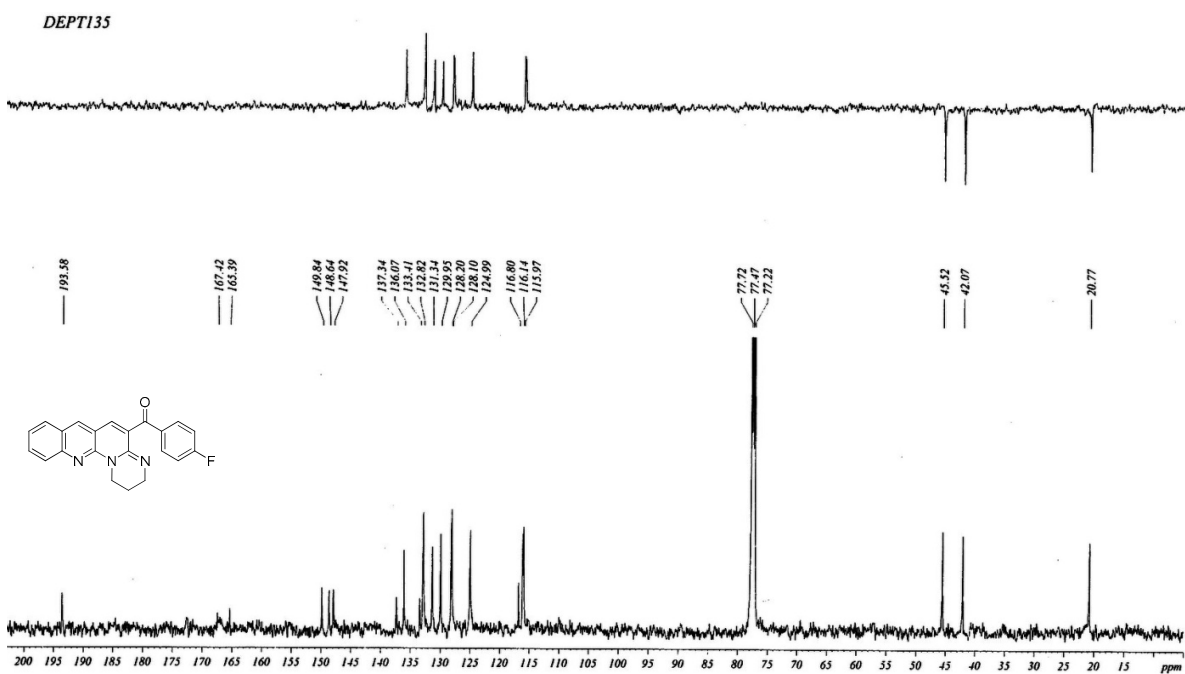

Fig. S24 <sup>13</sup>C NMR spectrum (125 MHz, CDCl<sub>3</sub>) of compound 31

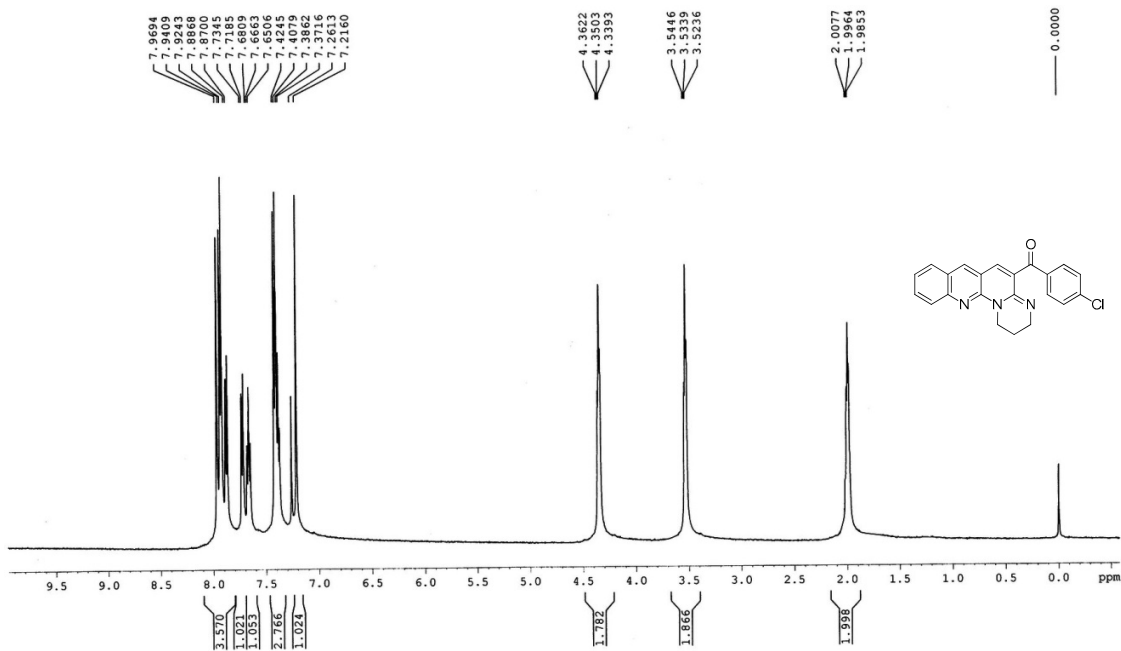

Fig. S25 <sup>1</sup>H NMR spectrum (500 MHz, CDCl<sub>3</sub>) of compound 3m

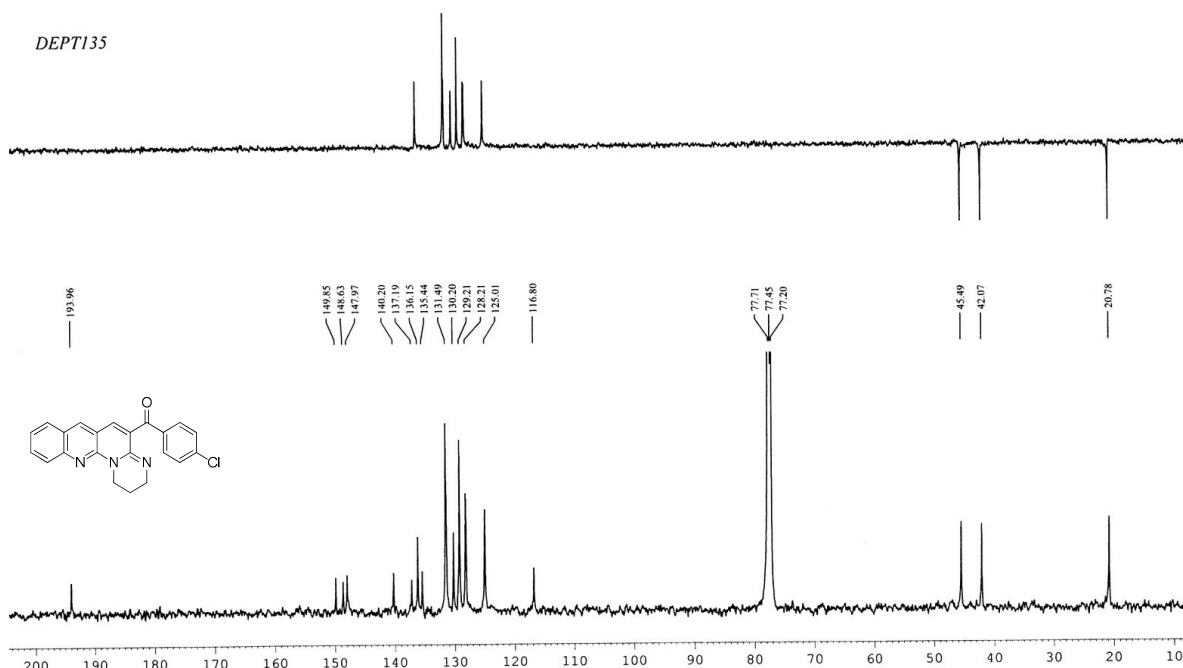

Fig. S26 <sup>13</sup>C NMR spectrum (125 MHz, CDCl<sub>3</sub>) of compound 3m

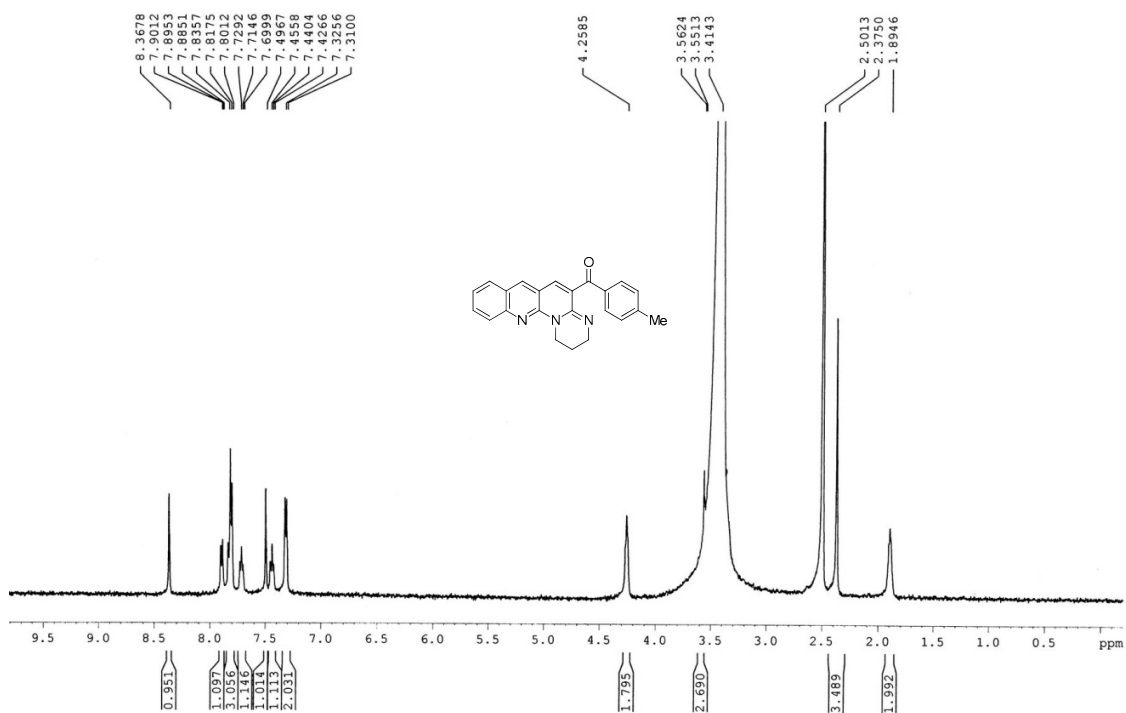

Fig. S27 <sup>1</sup>H NMR spectrum (500 MHz, DMSO-*d*<sub>6</sub>) of compound **3n**

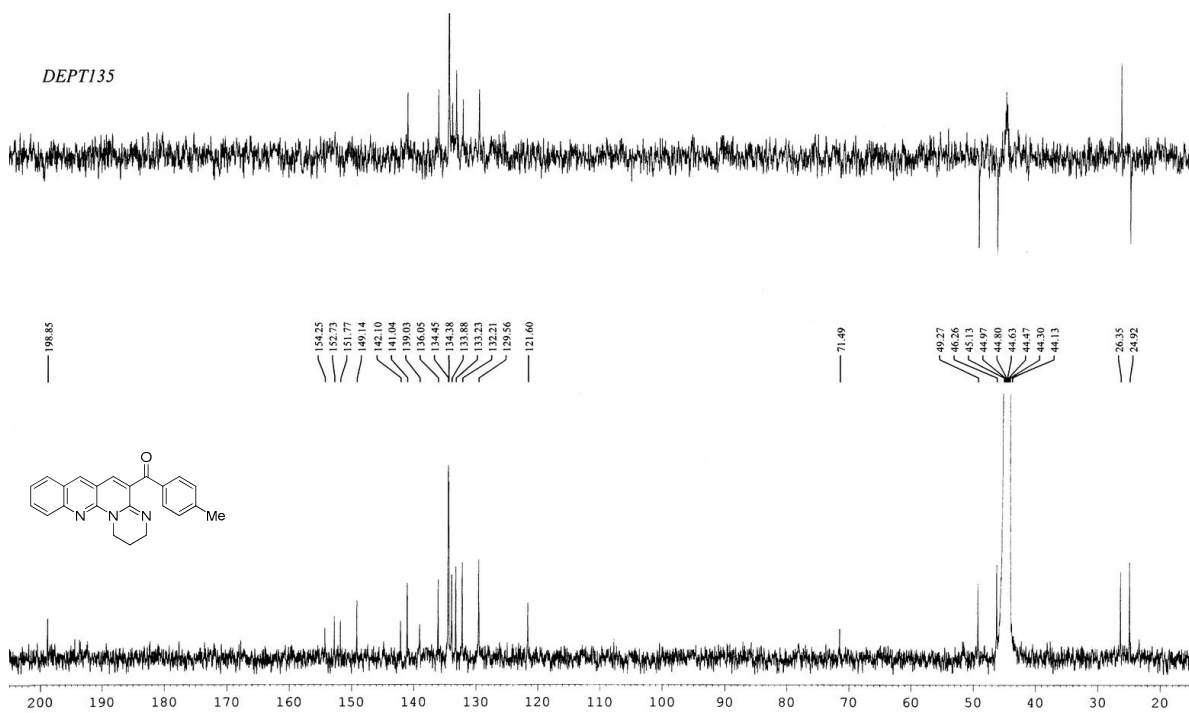

Fig. S28 <sup>13</sup>C NMR spectrum (125 MHz, DMSO-*d*<sub>6</sub>) of compound **3n**

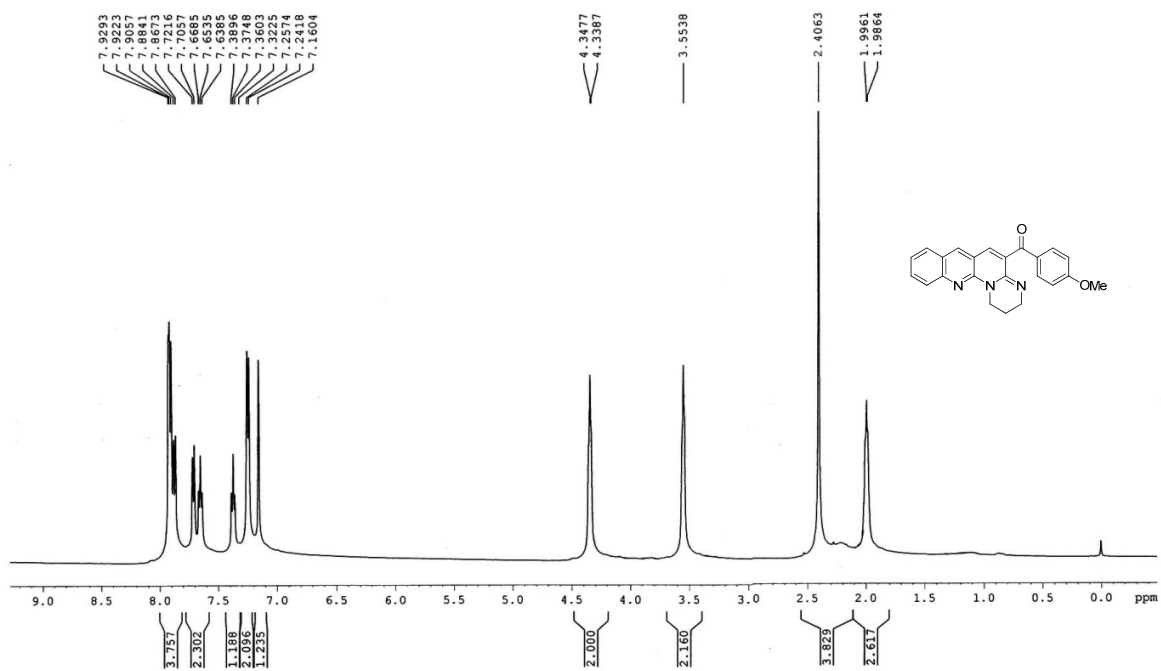

Fig. S29 <sup>1</sup>H NMR spectrum (500 MHz, CDCl<sub>3</sub>) of compound **3o**

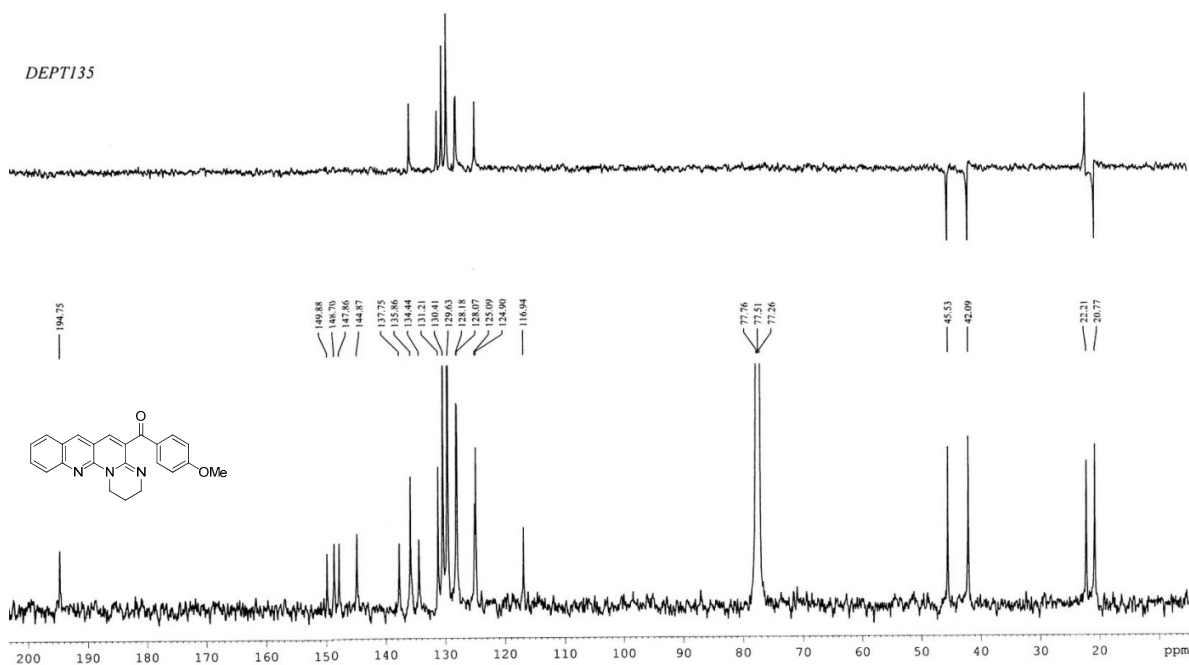

Fig. S30 <sup>13</sup>C NMR spectrum (125 MHz, CDCl<sub>3</sub>) of compound **3o**



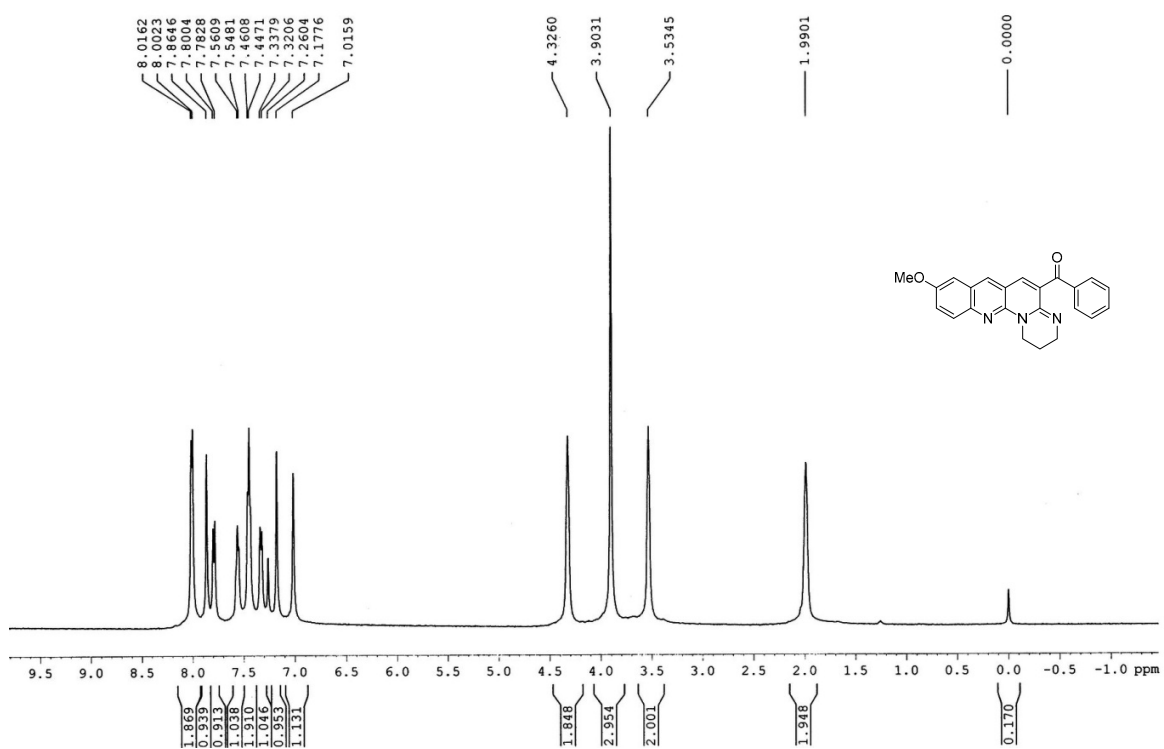

**Fig. S31** <sup>1</sup>H NMR spectrum (500 MHz, CDCl<sub>3</sub>) of compound **3p**

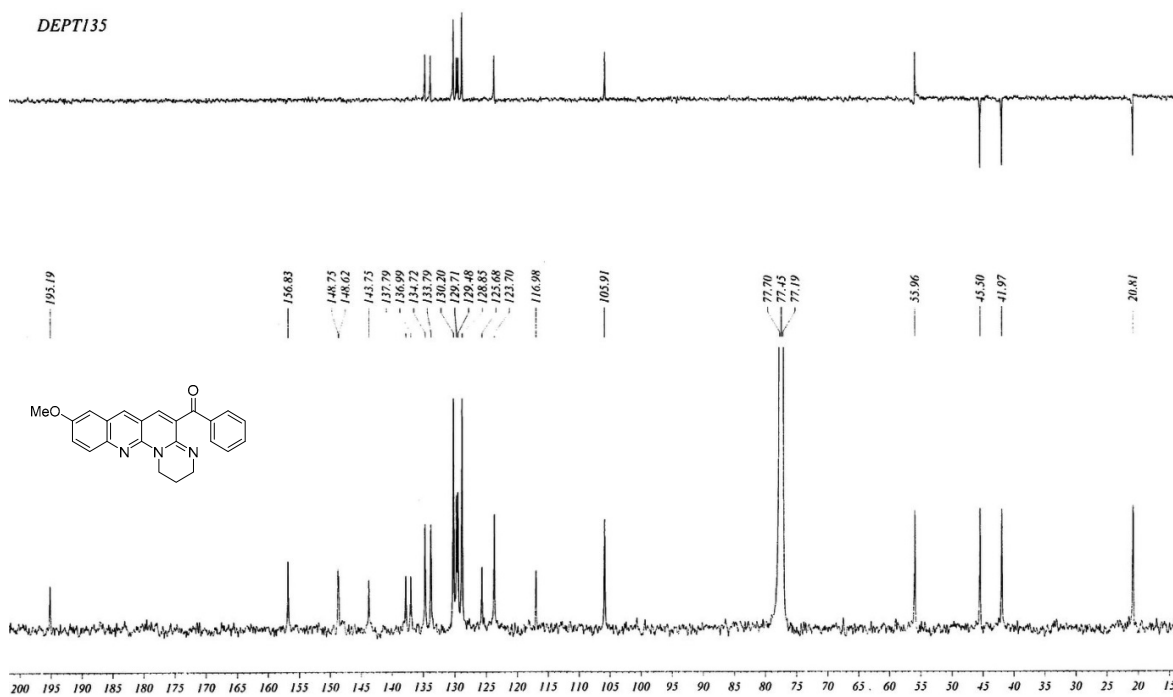

**Fig. S32** <sup>13</sup>C NMR spectrum (125 MHz, CDCl<sub>3</sub>) of compound **3p**

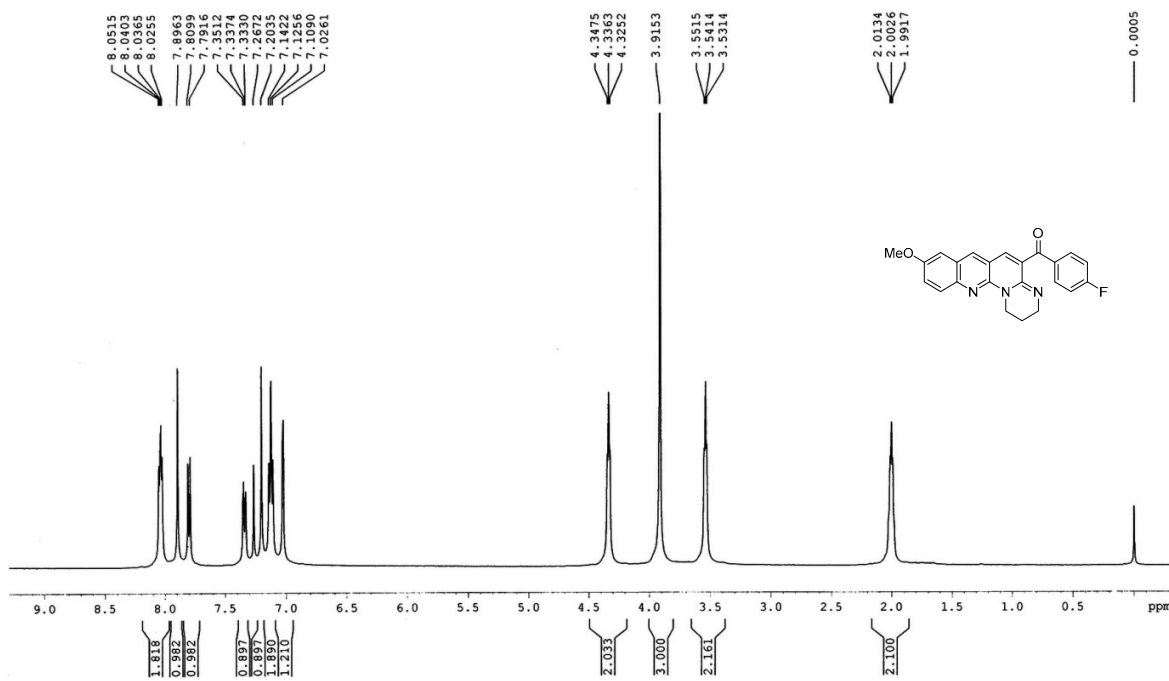

Fig. S33 <sup>1</sup>H NMR spectrum (500 MHz, CDCl<sub>3</sub>) of compound 3q

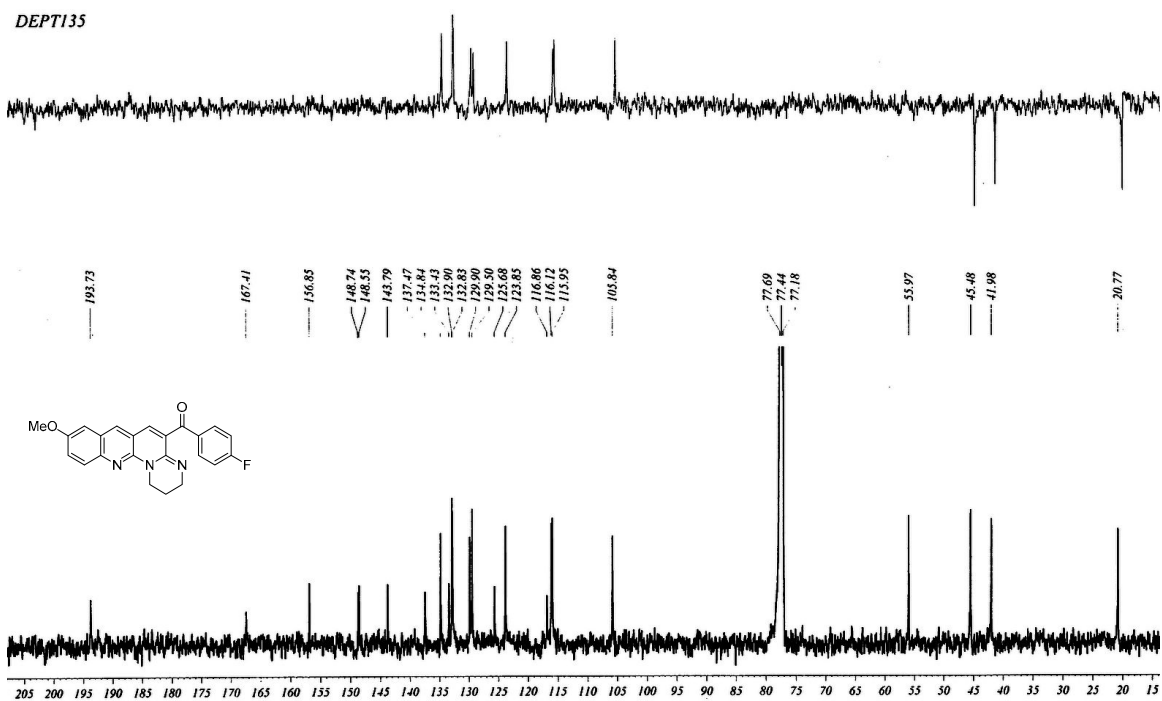

Fig. S34 <sup>13</sup>C NMR spectrum (125 MHz, CDCl<sub>3</sub>) of compound 3q

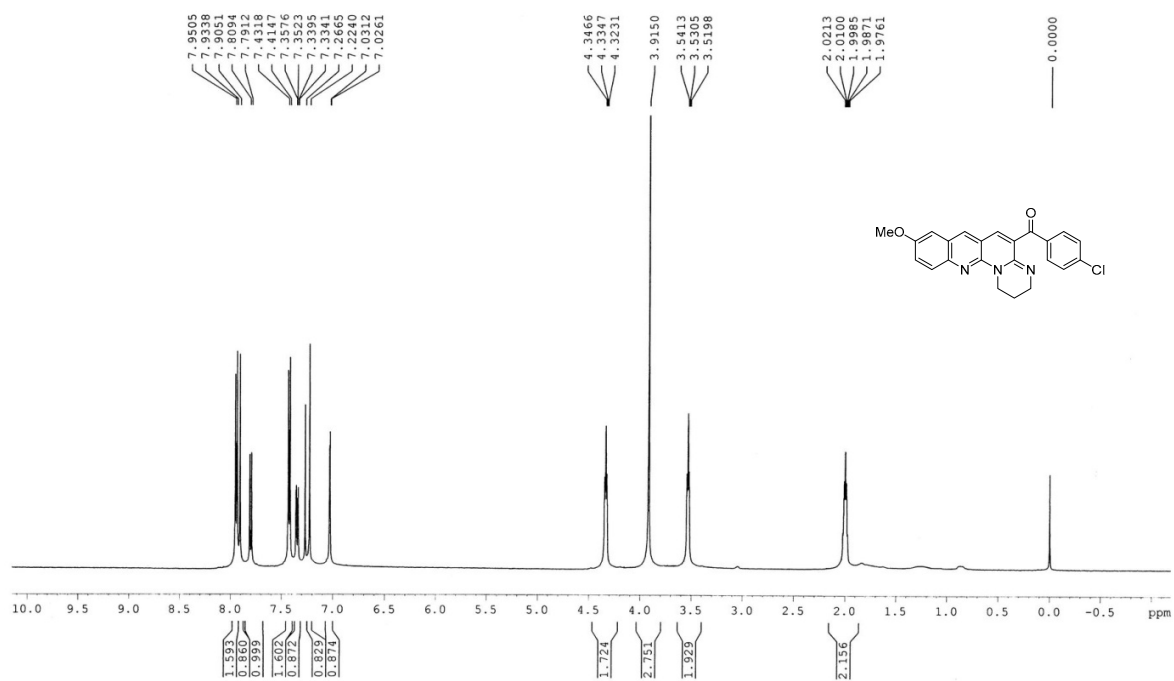

Fig. S35 <sup>1</sup>H NMR spectrum (500 MHz, CDCl<sub>3</sub>) of compound 3r

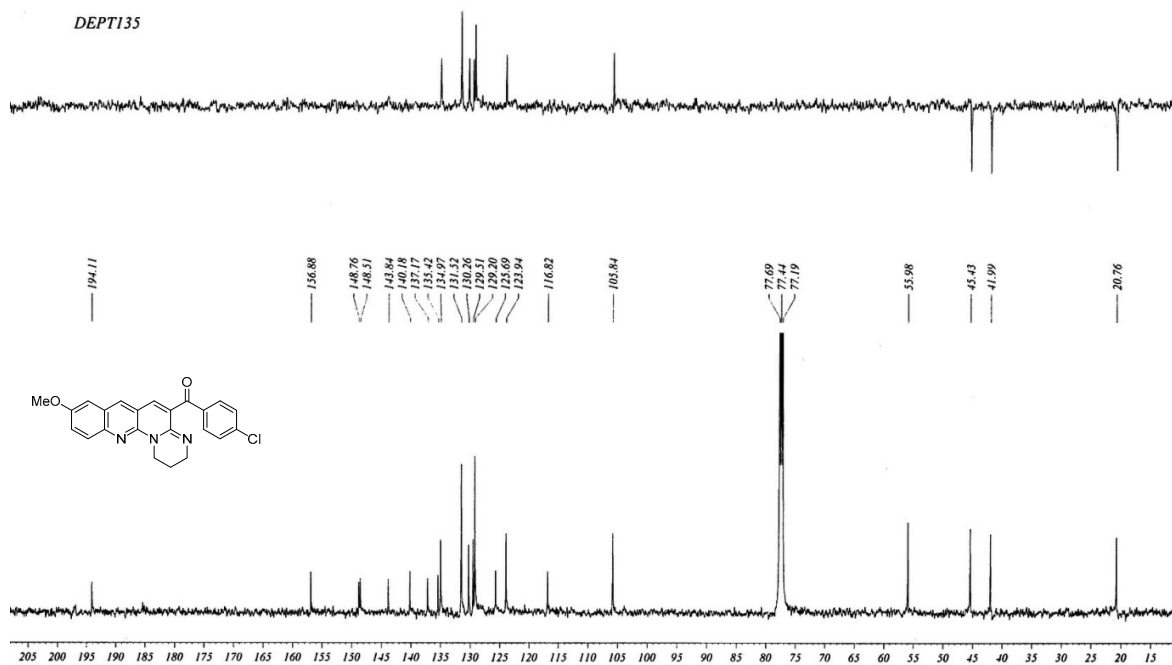

Fig. S36 <sup>13</sup>C NMR spectrum (125 MHz, CDCl<sub>3</sub>) of compound 3r

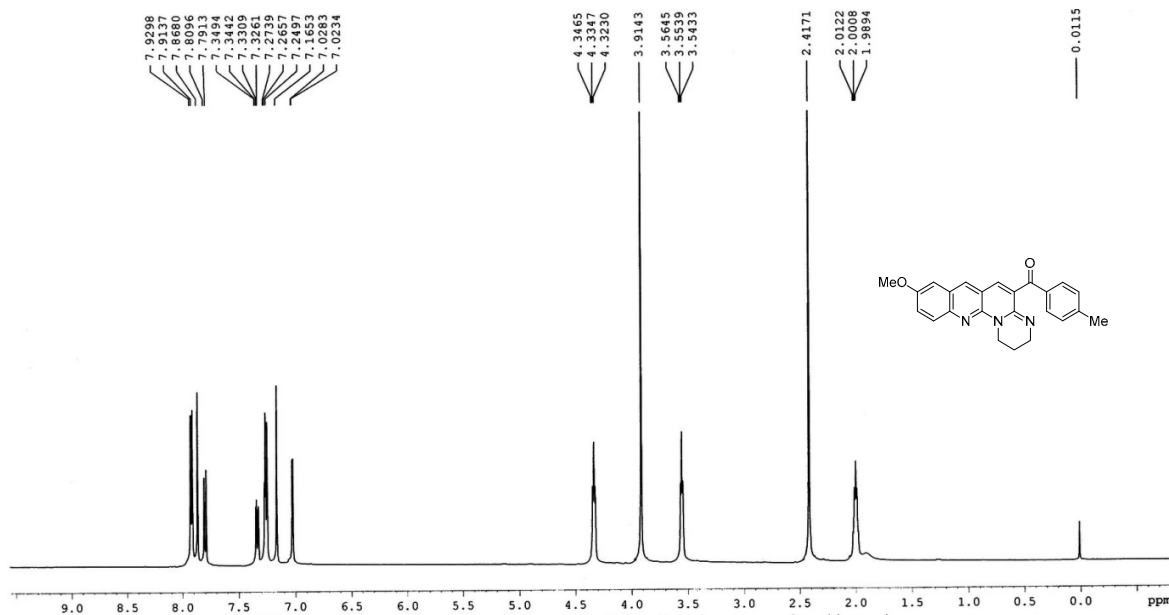

Fig. S37 <sup>1</sup>H NMR spectrum (500 MHz, CDCl<sub>3</sub>) of compound 3s

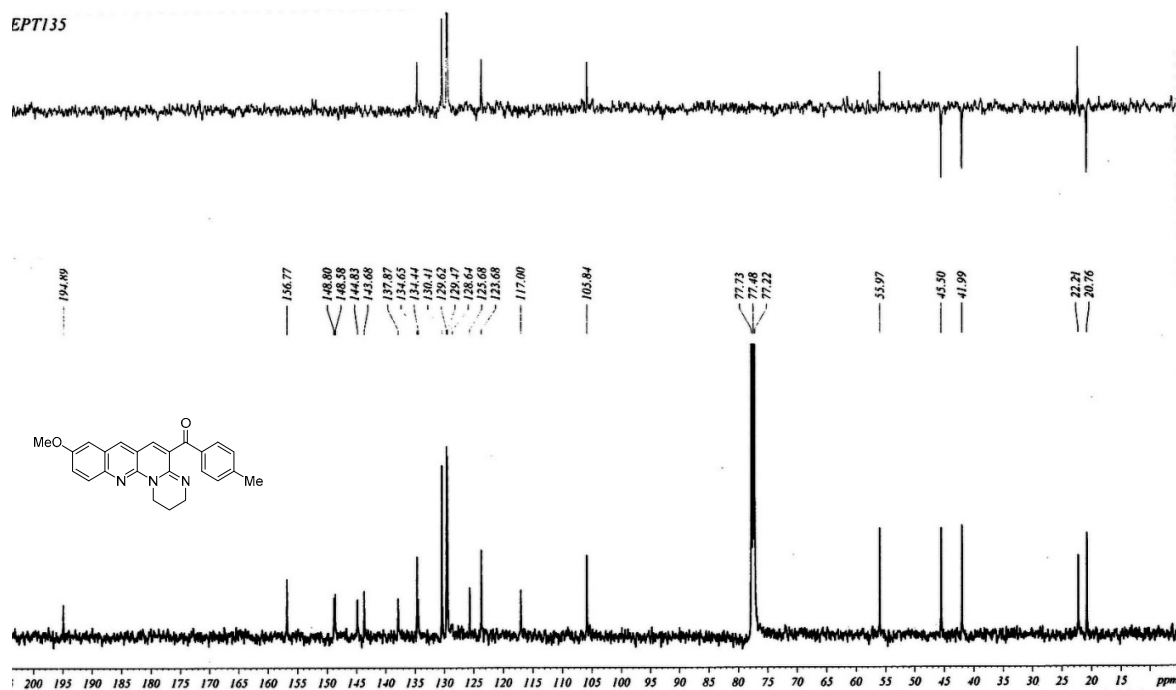

Fig. S38 <sup>13</sup>C NMR spectrum (125 MHz, CDCl<sub>3</sub>) of compound 3s

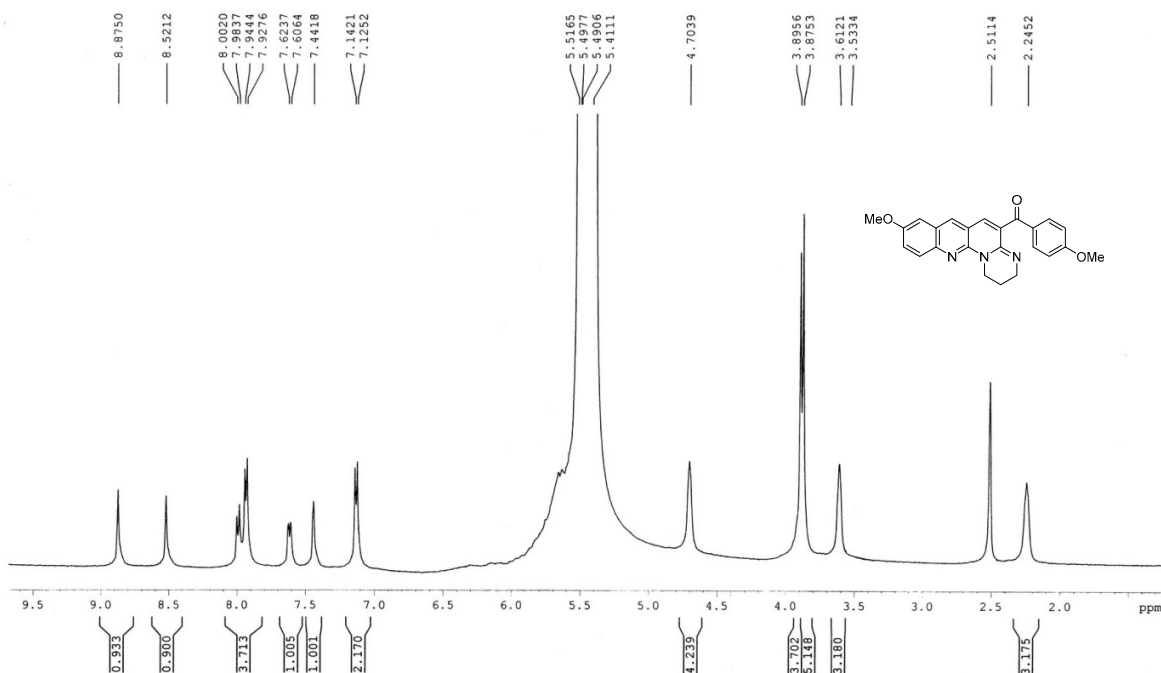

Fig. S39  $^1\text{H}$  NMR spectrum (500 MHz,  $\text{DMSO-}d_6 + \text{HClO}_4$ ) of compound 3t

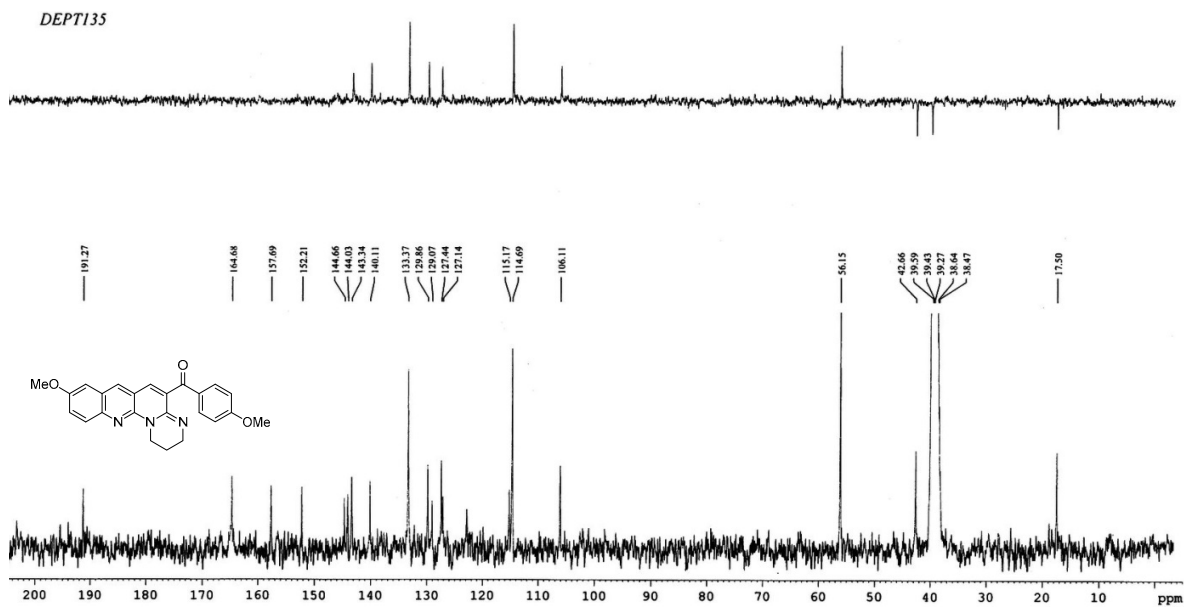

Fig. S40  $^{13}\text{C}$  NMR spectrum (125 MHz,  $\text{DMSO-}d_6 + \text{HClO}_4$ ) of compound 3t

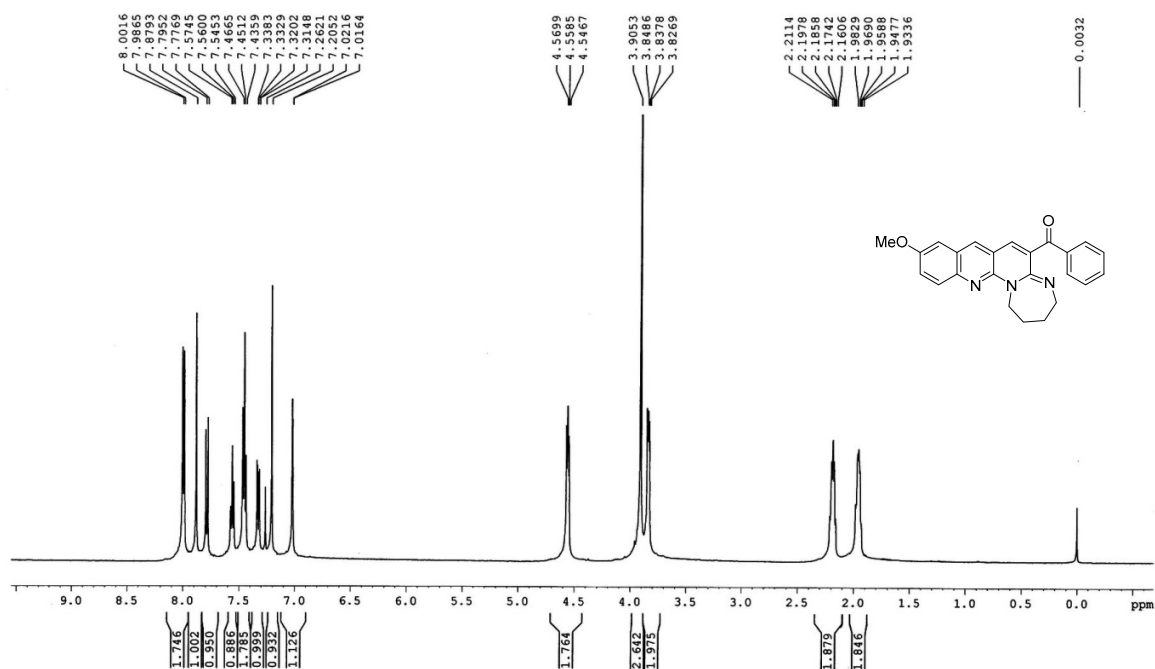

Fig. S41  $^1\text{H}$  NMR spectrum (500 MHz,  $\text{CDCl}_3$ ) of compound **3u**

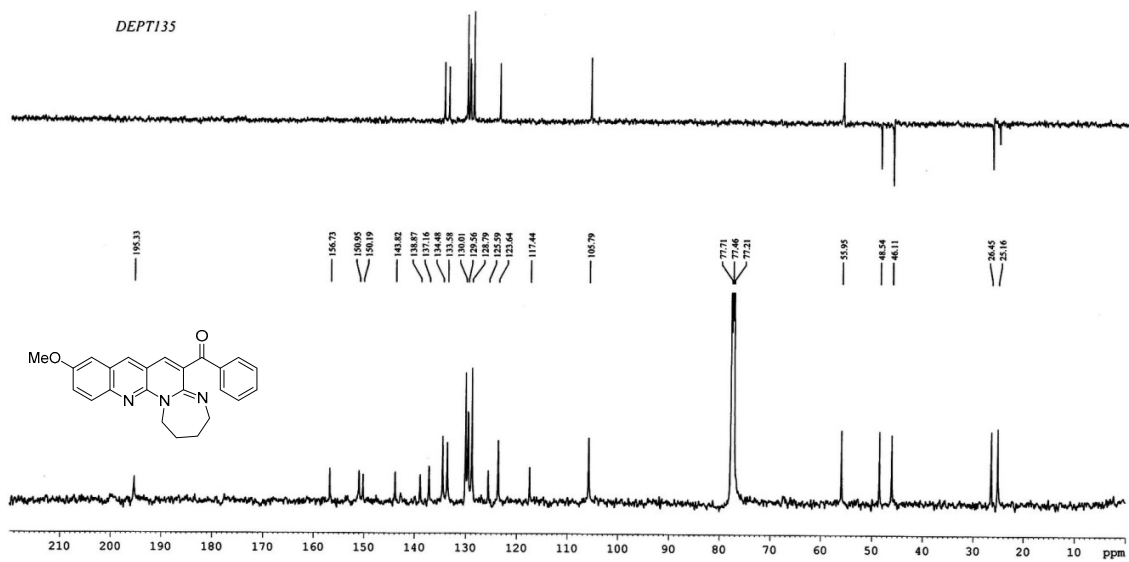

Fig. S42  $^{13}\text{C}$  NMR spectrum (125 MHz,  $\text{CDCl}_3$ ) of compound **3u**

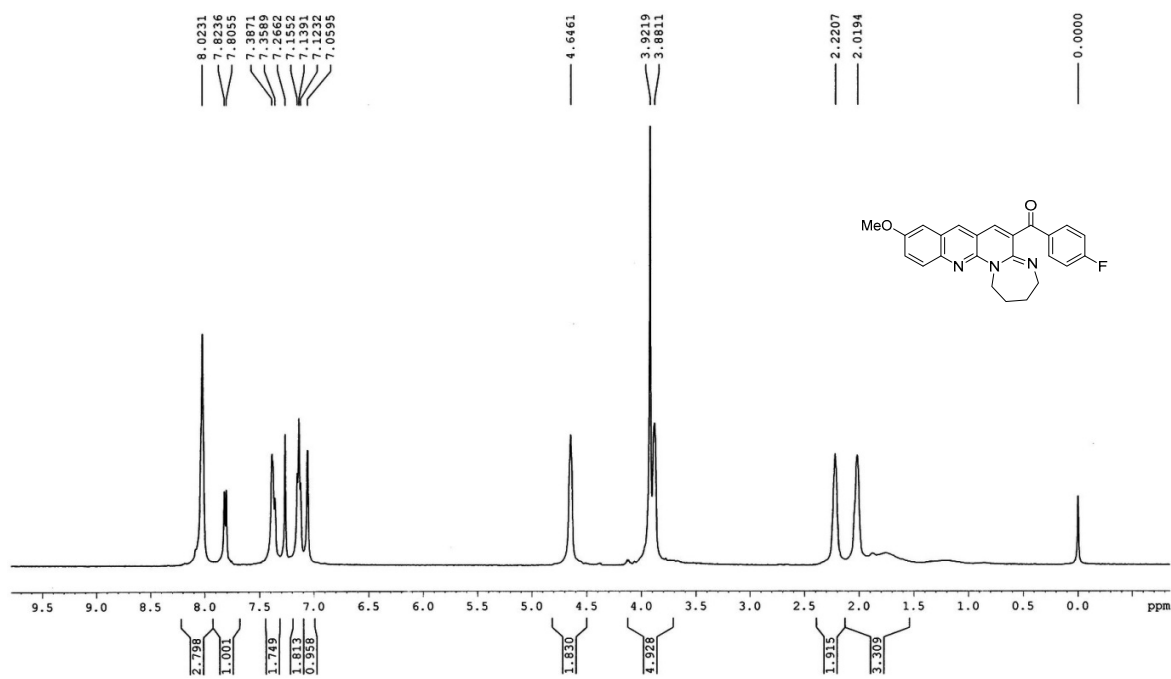

Fig. S43 <sup>1</sup>H NMR spectrum (500 MHz, CDCl<sub>3</sub>) of compound 3v

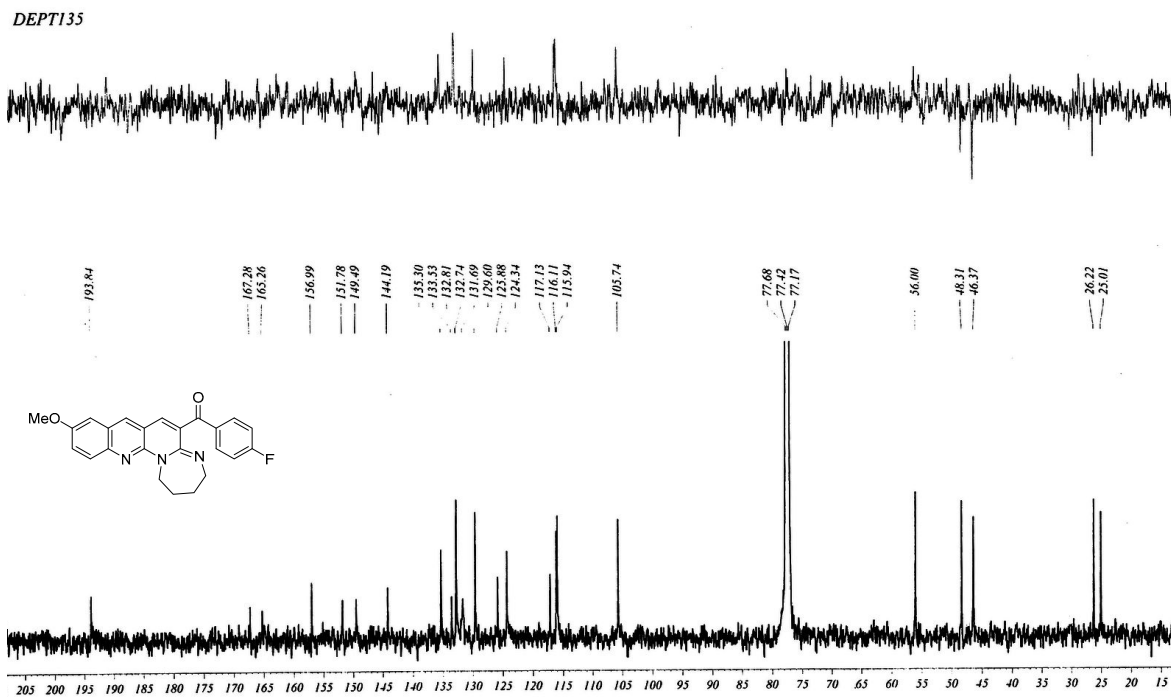

Fig. S44 <sup>13</sup>C NMR spectrum (125 MHz, CDCl<sub>3</sub>) of compound 3v

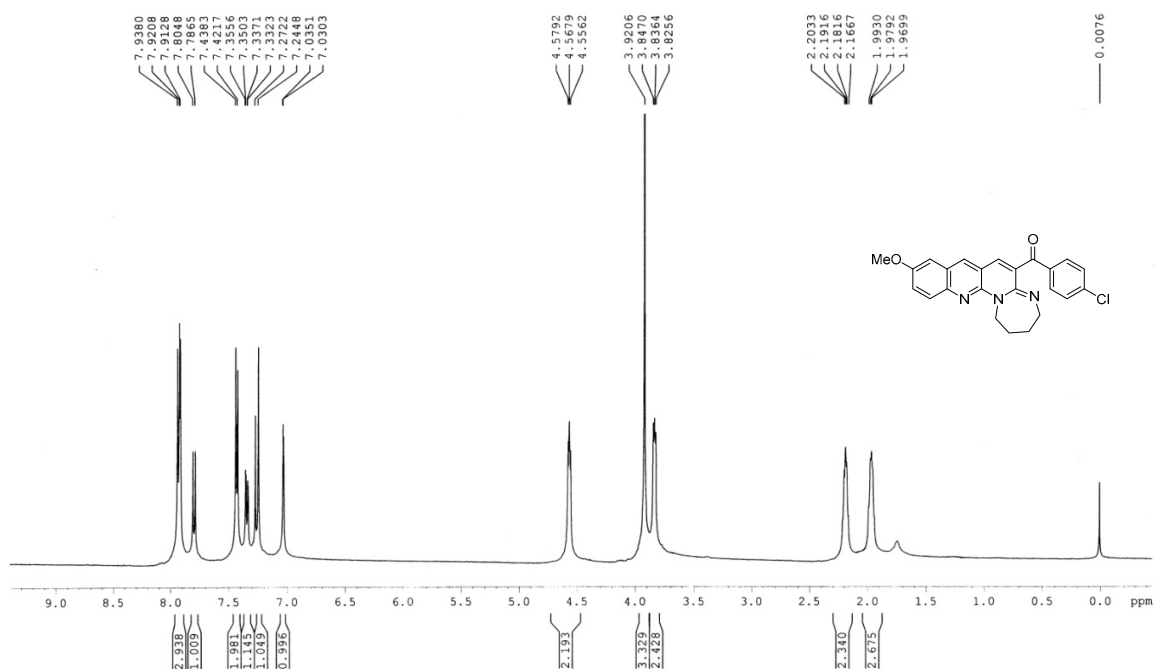

Fig. S45 <sup>1</sup>H NMR spectrum (500 MHz, CDCl<sub>3</sub>) of compound 3w

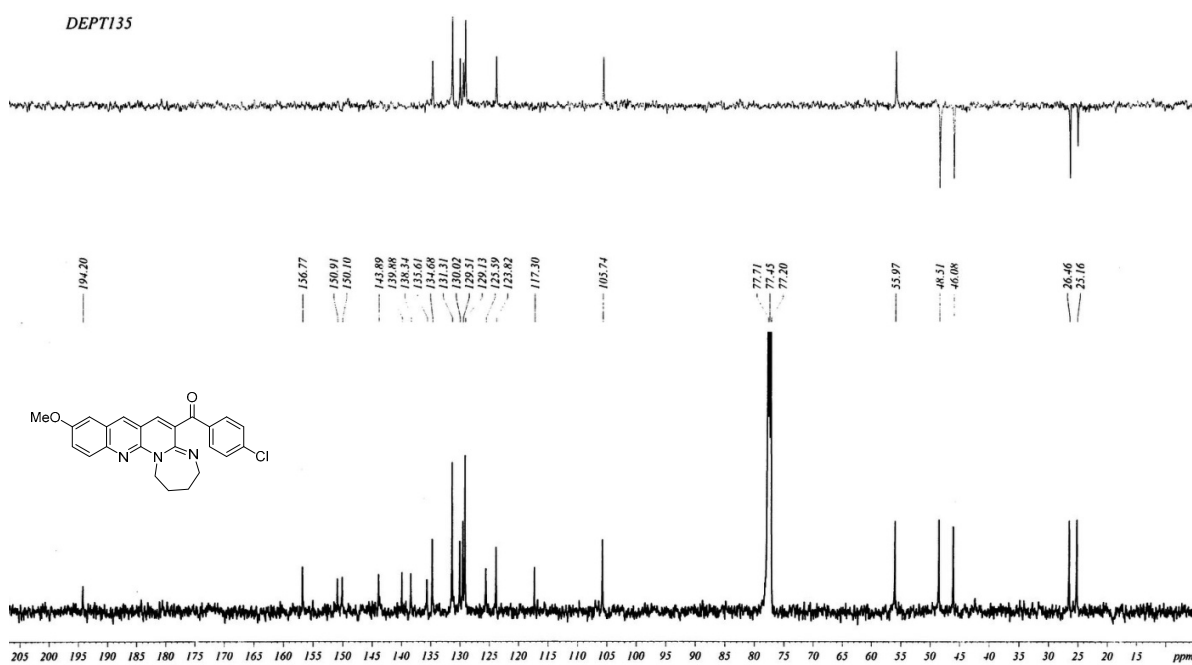

Fig. S46 <sup>13</sup>C NMR spectrum (125 MHz, CDCl<sub>3</sub>) of compound 3w



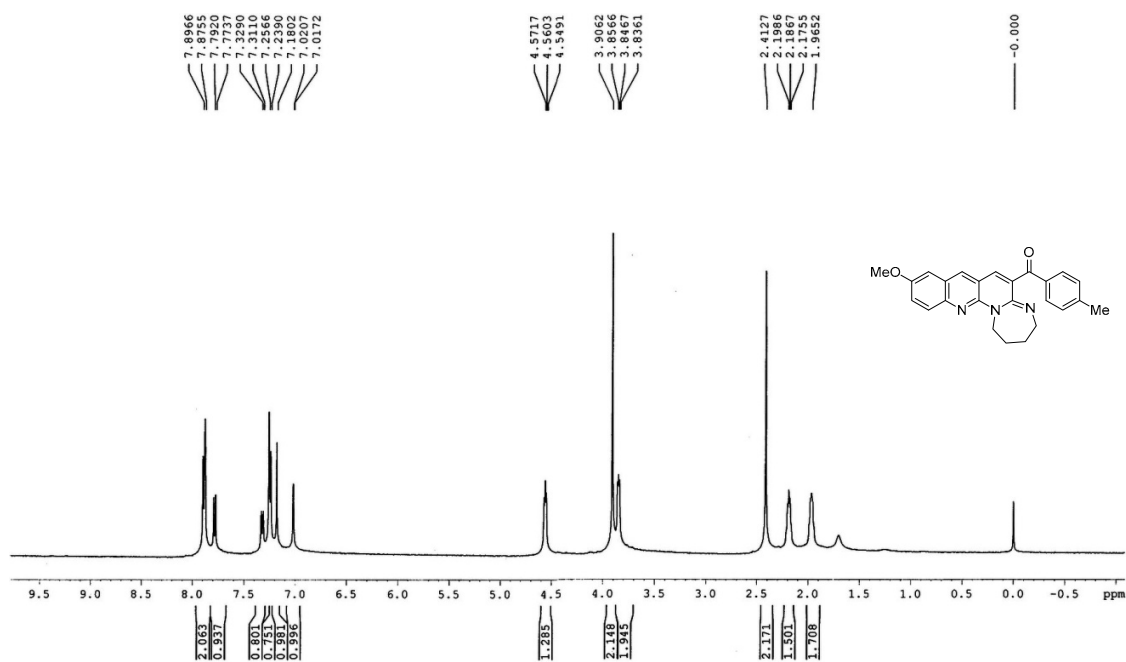

Fig. S47 <sup>1</sup>H NMR spectrum (500 MHz, CDCl<sub>3</sub>) of compound 3x

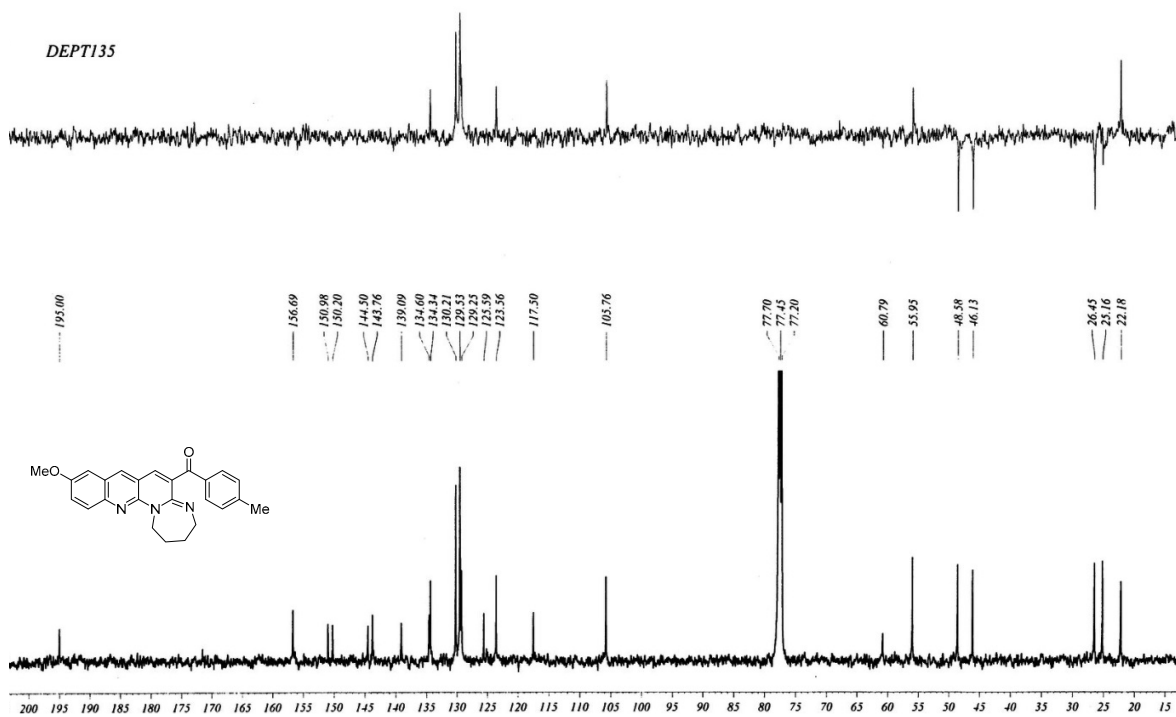

Fig. S48 <sup>13</sup>C NMR spectrum (125 MHz, CDCl<sub>3</sub>) of compound 3x

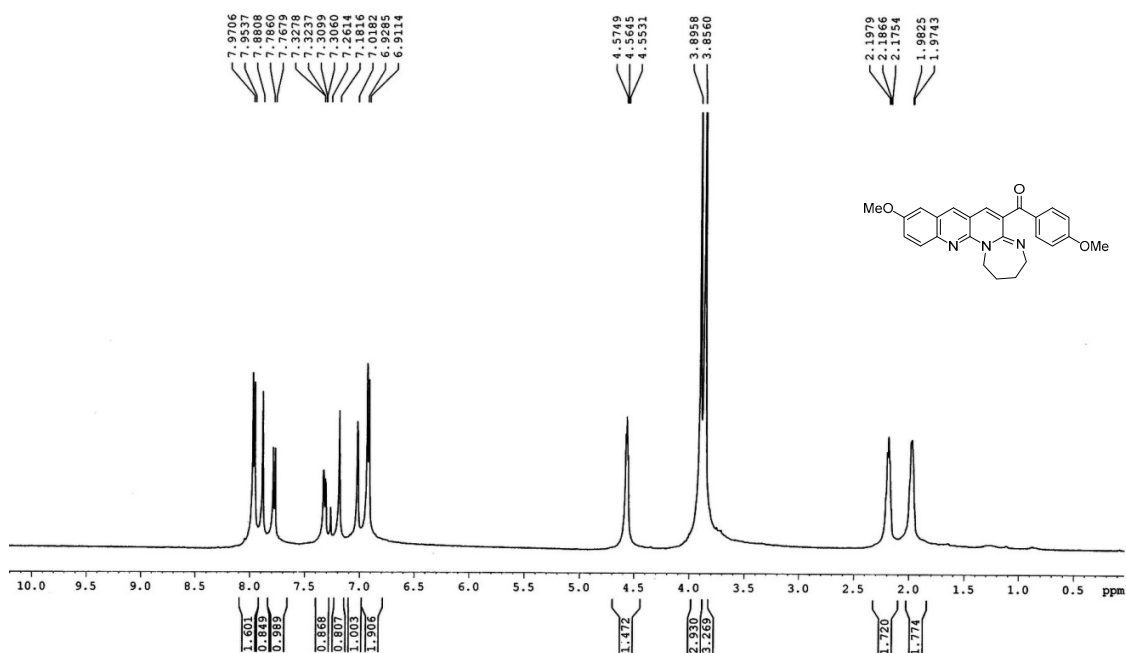

Fig. S49 <sup>1</sup>H NMR spectrum (500 MHz, CDCl<sub>3</sub>) of compound **3y**

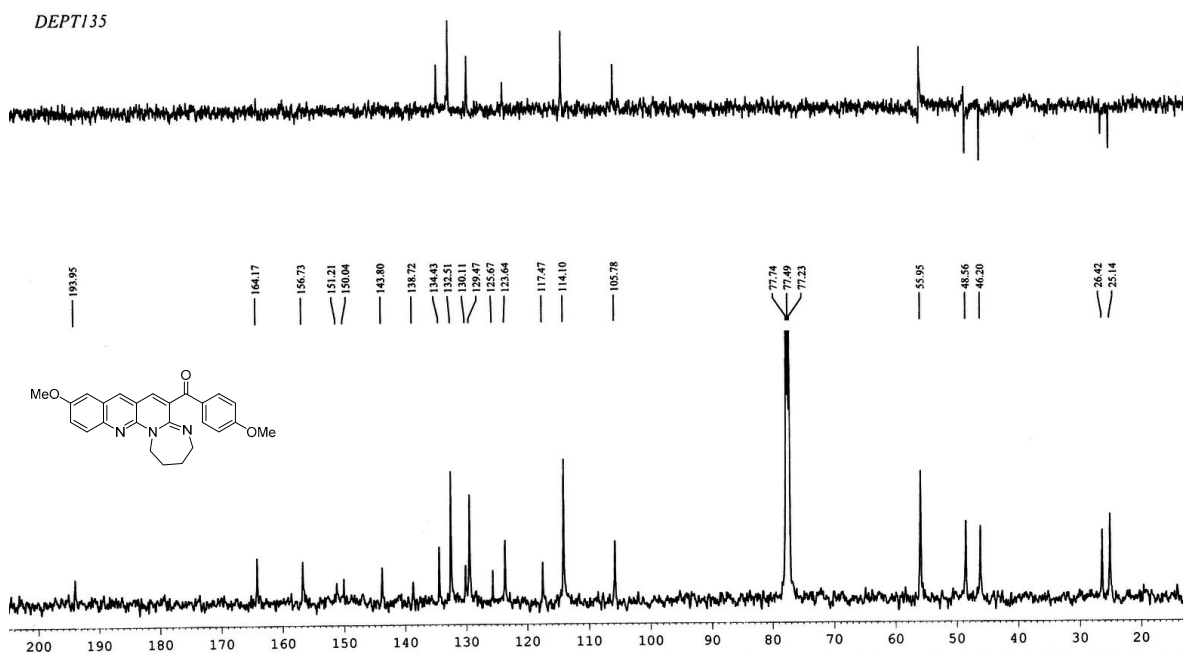

Fig. S50 <sup>13</sup>C NMR spectrum (125 MHz, CDCl<sub>3</sub>) of compound **3y**

## 2 Geometries, energies and graphics of frontier molecular orbital for all optimized synthons and intermediates<sup>1</sup>

Single Point Energy ( $E_{\text{B3LYP}}$ , in Hartree)

Zero-point correction ( $E_0$ , in Hartree)

Thermal correction to Enthalpy ( $H$ , in Hartree)

Thermal correction to Gibbs Free Energy ( $TCGFE$ , in Hartree)

**Table S1.** Cartesian coordinates, optimized geometry, and energies of compound **1a**

| 2-Chloroquinoline-3-carbaldehyde ( <b>1a</b> )                                                              |          |           |           |           |          |
|-------------------------------------------------------------------------------------------------------------|----------|-----------|-----------|-----------|----------|
| $E_{\text{B3LYP}}$                                                                                          | $E_0$    | $H$       | $TCGFE$   |           |          |
| -974.9948565                                                                                                | 0.134526 | 0.145440  | 0.098169  |           |          |
| 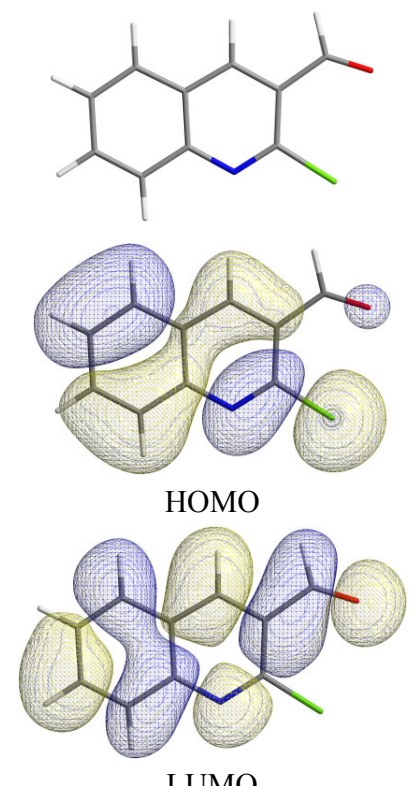 <p>HOMO</p> <p>LUMO</p> |          | Atoms     | $x$       | $y$       | $z$      |
|                                                                                                             |          | C         | -3.684814 | 0.636347  | 0.000005 |
|                                                                                                             | C        | -3.601097 | -0.776043 | 0.000020  |          |
|                                                                                                             | C        | -2.381181 | -1.411137 | 0.000019  |          |
|                                                                                                             | C        | -1.188228 | -0.651591 | 0.000003  |          |
|                                                                                                             | C        | -1.270267 | 0.773099  | -0.000011 |          |
|                                                                                                             | C        | -2.541957 | 1.398571  | -0.000010 |          |
|                                                                                                             | N        | 0.009338  | -1.304226 | 0.000002  |          |
|                                                                                                             | C        | 1.107071  | -0.615205 | -0.000013 |          |
|                                                                                                             | C        | 1.163260  | 0.818243  | -0.000027 |          |
|                                                                                                             | C        | -0.049021 | 1.477222  | -0.000022 |          |
|                                                                                                             | Cl       | 2.591102  | -1.548839 | -0.000013 |          |
|                                                                                                             | C        | 2.383544  | 1.670219  | -0.000051 |          |
|                                                                                                             | H        | 2.127655  | 2.753706  | 0.000109  |          |
|                                                                                                             | O        | 3.532035  | 1.310010  | 0.000076  |          |
|                                                                                                             | H        | -4.657650 | 1.113690  | 0.000006  |          |
|                                                                                                             | H        | -4.513381 | -1.361560 | 0.000033  |          |
|                                                                                                             | H        | -2.294779 | -2.490405 | 0.000030  |          |
|                                                                                                             | H        | -2.598244 | 2.481887  | -0.000021 |          |
|                                                                                                             | H        | -0.057837 | 2.564105  | -0.000030 |          |

**Table S2.** Cartesian coordinates, optimized geometry, and energies of compound **1b**

| <b>2-Chloro-6-methoxyquinoline-3-carbaldehyde (1b)</b>                                                                      |          |          |           |           |           |
|-----------------------------------------------------------------------------------------------------------------------------|----------|----------|-----------|-----------|-----------|
| $E_{\text{B3LYP}}$                                                                                                          | $E_0$    | $H$      | $TCGFE$   |           |           |
| -1089.5477113                                                                                                               | 0.166616 | 0.180247 | 0.126714  |           |           |
| 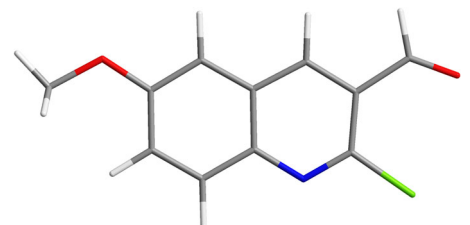                                           |          | Atoms    | $x$       | $y$       | $z$       |
|                                                                                                                             |          | C        | 2.933152  | 0.281679  | 0.000001  |
|  <p style="text-align: center;">HOMO</p>  |          | C        | 2.733864  | -1.123411 | 0.000032  |
|                                                                                                                             |          | C        | 1.462827  | -1.651000 | 0.000033  |
|  <p style="text-align: center;">LUMO</p> |          | C        | 0.331718  | -0.807653 | 0.000003  |
|                                                                                                                             |          | C        | 0.534168  | 0.605886  | -0.000028 |
|                                                                                                                             |          | C        | 1.841801  | 1.130459  | -0.000029 |
|                                                                                                                             |          | N        | -0.912629 | -1.364340 | 0.000005  |
|                                                                                                                             |          | C        | -1.951896 | -0.591765 | -0.000019 |
|                                                                                                                             |          | C        | -1.890412 | 0.842300  | -0.000054 |
|                                                                                                                             |          | C        | -0.631446 | 1.404726  | -0.000050 |
|                                                                                                                             |          | Cl       | -3.508107 | -1.403755 | -0.000027 |
|                                                                                                                             |          | C        | -3.038201 | 1.790147  | -0.000100 |
|                                                                                                                             |          | H        | -2.695605 | 2.849451  | 0.000152  |
|                                                                                                                             |          | O        | -4.212303 | 1.524393  | 0.000170  |
|                                                                                                                             |          | O        | 4.157312  | 0.871905  | -0.000002 |
|                                                                                                                             |          | H        | 3.583031  | -1.793275 | 0.000054  |
|                                                                                                                             |          | H        | 1.298992  | -2.721285 | 0.000056  |
|                                                                                                                             |          | H        | 2.009263  | 2.201056  | -0.000053 |
|                                                                                                                             |          | H        | -0.538028 | 2.487449  | -0.000073 |
|                                                                                                                             |          | C        | 5.323622  | 0.055338  | 0.000022  |
|                                                                                                                             |          | H        | 6.163886  | 0.746883  | 0.000011  |
|                                                                                                                             |          | H        | 5.374721  | -0.573361 | -0.895221 |
|                                                                                                                             |          | H        | 5.374713  | -0.573321 | 0.895293  |

**Table S3.** Cartesian coordinates, optimized geometry, and energies of compound **2a**

| <b>2-(Imidazolidin-2-ylidene)-1-phenylethan-1-one (2a)</b>                                      |           |           |           |           |           |
|-------------------------------------------------------------------------------------------------|-----------|-----------|-----------|-----------|-----------|
| $E_{\text{B3LYP}}$                                                                              | $E_0$     | $H$       | $TCGFE$   |           |           |
| -611.284314                                                                                     | 0.213689  | 0.226396  | 0.174478  |           |           |
|                                                                                                 |           | Atoms     | $x$       | $y$       | $z$       |
| 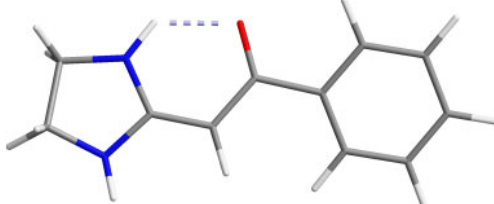               |           | N         | 2.618914  | -0.863830 | -0.003120 |
|                                                                                                 |           | N         | 3.076600  | 1.304268  | 0.000268  |
|  <p>HOMO</p>  |           | O         | 0.079173  | -1.625601 | -0.131799 |
|                                                                                                 |           | C         | 4.055546  | -0.791075 | -0.232127 |
|                                                                                                 |           | H         | 4.302360  | -0.902564 | -1.296127 |
|                                                                                                 |           | H         | 4.594788  | -1.552404 | 0.333472  |
|                                                                                                 |           | C         | 4.358630  | 0.636727  | 0.258746  |
|                                                                                                 |           | H         | 4.607654  | 0.635158  | 1.328041  |
|                                                                                                 |           | H         | 5.171860  | 1.108684  | -0.293977 |
|                                                                                                 |           | C         | 2.061360  | 0.367757  | 0.025840  |
|                                                                                                 |           | C         | 0.704892  | 0.638280  | 0.049013  |
|                                                                                                 |           | H         | 0.395160  | 1.669273  | 0.126689  |
|  <p>LUMO</p> |           | C         | -0.249417 | -0.424613 | -0.042604 |
|                                                                                                 |           | C         | -1.722323 | -0.096282 | -0.017424 |
|                                                                                                 |           | C         | -2.236780 | 1.197445  | -0.168090 |
|                                                                                                 |           | H         | -1.571459 | 2.037374  | -0.325237 |
|                                                                                                 |           | C         | -3.610594 | 1.423445  | -0.142925 |
|                                                                                                 |           | H         | -3.992977 | 2.430695  | -0.267358 |
|                                                                                                 |           | C         | -4.492172 | 0.359705  | 0.037145  |
|                                                                                                 |           | C         | -3.991291 | -0.933476 | 0.183080  |
|                                                                                                 |           | H         | -4.671976 | -1.766741 | 0.319831  |
|                                                                                                 |           | C         | -2.619919 | -1.158082 | 0.150708  |
| H                                                                                               | -2.208809 | -2.154691 | 0.250121  |           |           |
| H                                                                                               | 1.988928  | -1.642262 | -0.188627 |           |           |
| H                                                                                               | 2.896795  | 2.203258  | 0.420051  |           |           |
| H                                                                                               | -5.561895 | 0.536969  | 0.059299  |           |           |

**Table S4.** Cartesian coordinates, optimized geometry, and energies of compound **2b**

| <b>1-(4-Fluorophenyl)-2-(imidazolidin-2-ylidene)ethan-1-one (2b)</b>                                                                                                                                                                                                           |           |           |           |           |
|--------------------------------------------------------------------------------------------------------------------------------------------------------------------------------------------------------------------------------------------------------------------------------|-----------|-----------|-----------|-----------|
| $E_{\text{B3LYP}}$                                                                                                                                                                                                                                                             | $E_0$     | $H$       | $TCGFE$   |           |
| -611.284314                                                                                                                                                                                                                                                                    | 0.213689  | 0.226396  | 0.174478  |           |
| 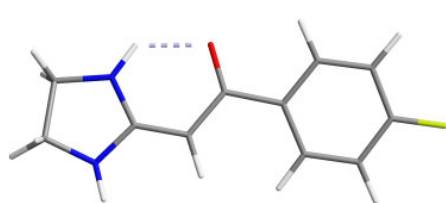<br><br>HOMO<br><br>LUMO | Atoms     | $x$       | $y$       | $z$       |
|                                                                                                                                                                                                                                                                                | N         | -3.069639 | 0.835232  | 0.022340  |
|                                                                                                                                                                                                                                                                                | N         | -3.479147 | -1.341230 | -0.036419 |
|                                                                                                                                                                                                                                                                                | O         | -0.546036 | 1.654039  | -0.089054 |
|                                                                                                                                                                                                                                                                                | C         | -4.504889 | 0.737614  | -0.208310 |
|                                                                                                                                                                                                                                                                                | H         | -4.754495 | 0.875529  | -1.268435 |
|                                                                                                                                                                                                                                                                                | H         | -5.060021 | 1.469679  | 0.379954  |
|                                                                                                                                                                                                                                                                                | C         | -4.776172 | -0.710633 | 0.239553  |
|                                                                                                                                                                                                                                                                                | H         | -5.026027 | -0.746908 | 1.307956  |
|                                                                                                                                                                                                                                                                                | H         | -5.577909 | -1.184093 | -0.328353 |
|                                                                                                                                                                                                                                                                                | C         | -2.485498 | -0.383868 | 0.016057  |
|                                                                                                                                                                                                                                                                                | C         | -1.123034 | -0.626333 | 0.031729  |
|                                                                                                                                                                                                                                                                                | H         | -0.794206 | -1.653421 | 0.074401  |
|                                                                                                                                                                                                                                                                                | C         | -0.192013 | 0.458222  | -0.030522 |
|                                                                                                                                                                                                                                                                                | C         | 1.287167  | 0.164358  | -0.016130 |
|                                                                                                                                                                                                                                                                                | C         | 1.834750  | -1.119326 | -0.132965 |
|                                                                                                                                                                                                                                                                                | H         | 1.193305  | -1.983171 | -0.250605 |
|                                                                                                                                                                                                                                                                                | C         | 3.212260  | -1.31689  | -0.119478 |
|                                                                                                                                                                                                                                                                                | H         | 3.647491  | -2.304012 | -0.214056 |
|                                                                                                                                                                                                                                                                                | C         | 4.040964  | -0.213588 | 0.014862  |
| C                                                                                                                                                                                                                                                                              | 3.537724  | 1.074106  | 0.129102  |           |
| H                                                                                                                                                                                                                                                                              | 4.220815  | 1.908637  | 0.229483  |           |
| C                                                                                                                                                                                                                                                                              | 2.160458  | 1.252915  | 0.108835  |           |
| H                                                                                                                                                                                                                                                                              | 1.725792  | 2.241130  | 0.186271  |           |
| H                                                                                                                                                                                                                                                                              | -2.457955 | 1.632471  | -0.142428 |           |
| H                                                                                                                                                                                                                                                                              | -3.279533 | -2.248675 | 0.355251  |           |
| F                                                                                                                                                                                                                                                                              | 5.380247  | -0.399662 | 0.031682  |           |

**Table S5.** Cartesian coordinates, optimized geometry, and energies of compound **2c**

| <b>1-(4-Chlorophenyl)-2-(imidazolidin-2-ylidene)ethan-1-one (2c)</b>                                                                                                                                                                                                                                                                           |          |           |           |           |
|------------------------------------------------------------------------------------------------------------------------------------------------------------------------------------------------------------------------------------------------------------------------------------------------------------------------------------------------|----------|-----------|-----------|-----------|
| $E_{\text{B3LYP}}$                                                                                                                                                                                                                                                                                                                             | $E_0$    | $H$       | $TCGFE$   |           |
| -1070.9071328                                                                                                                                                                                                                                                                                                                                  | 0.204050 | 0.218019  | 0.162612  |           |
| 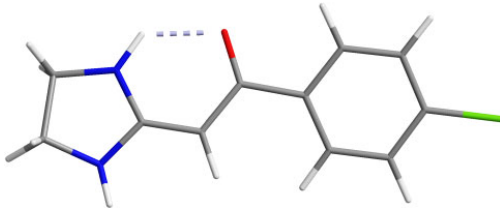<br> <p style="text-align: center;">HOMO</p><br> <p style="text-align: center;">LUMO</p> | Atoms    | $x$       | $y$       | $z$       |
|                                                                                                                                                                                                                                                                                                                                                | Cl       | 5.369971  | -0.326450 | 0.033232  |
|                                                                                                                                                                                                                                                                                                                                                | N        | -3.517365 | 0.807651  | 0.011582  |
|                                                                                                                                                                                                                                                                                                                                                | N        | -3.885576 | -1.375998 | -0.013283 |
|                                                                                                                                                                                                                                                                                                                                                | O        | -1.007834 | 1.673740  | -0.111910 |
|                                                                                                                                                                                                                                                                                                                                                | C        | -4.951914 | 0.680517  | -0.210320 |
|                                                                                                                                                                                                                                                                                                                                                | H        | -5.208677 | 0.801314  | -1.270712 |
|                                                                                                                                                                                                                                                                                                                                                | H        | -5.517406 | 1.409341  | 0.371964  |
|                                                                                                                                                                                                                                                                                                                                                | C        | -5.194318 | -0.767137 | 0.256406  |
|                                                                                                                                                                                                                                                                                                                                                | H        | -5.441761 | -0.795121 | 1.325528  |
|                                                                                                                                                                                                                                                                                                                                                | H        | -5.987299 | -1.263316 | -0.304259 |
|                                                                                                                                                                                                                                                                                                                                                | C        | -2.910971 | -0.399837 | 0.021930  |
|                                                                                                                                                                                                                                                                                                                                                | C        | -1.543262 | -0.616014 | 0.037534  |
|                                                                                                                                                                                                                                                                                                                                                | H        | -1.193638 | -1.635394 | 0.097461  |
|                                                                                                                                                                                                                                                                                                                                                | C        | -0.634574 | 0.484777  | -0.040620 |
|                                                                                                                                                                                                                                                                                                                                                | C        | 0.850737  | 0.217093  | -0.025479 |
|                                                                                                                                                                                                                                                                                                                                                | C        | 1.421805  | -1.052858 | -0.165735 |
|                                                                                                                                                                                                                                                                                                                                                | H        | 0.797230  | -1.926006 | -0.305229 |
|                                                                                                                                                                                                                                                                                                                                                | C        | 2.802512  | -1.226333 | -0.151321 |
|                                                                                                                                                                                                                                                                                                                                                | H        | 3.238918  | -2.210155 | -0.265902 |
|                                                                                                                                                                                                                                                                                                                                                | C        | 3.621658  | -0.114511 | 0.008534  |
|                                                                                                                                                                                                                                                                                                                                                | C        | 3.084493  | 1.161616  | 0.145036  |
|                                                                                                                                                                                                                                                                                                                                                | H        | 3.738471  | 2.015852  | 0.264957  |
|                                                                                                                                                                                                                                                                                                                                                | C        | 1.704355  | 1.316829  | 0.122321  |
|                                                                                                                                                                                                                                                                                                                                                | H        | 1.254792  | 2.297213  | 0.215288  |
|                                                                                                                                                                                                                                                                                                                                                | H        | -2.922403 | 1.615223  | -0.162824 |
|                                                                                                                                                                                                                                                                                                                                                | H        | -3.667615 | -2.275646 | 0.386264  |

**Table S6.** Cartesian coordinates, optimized geometry, and energies of compound **2d**

| <b>2-(Imidazolidin-2-ylidene)-1-(<i>p</i>-tolyl)ethanone (2d)</b>                                                                                                               |           |           |           |           |           |
|---------------------------------------------------------------------------------------------------------------------------------------------------------------------------------|-----------|-----------|-----------|-----------|-----------|
| $E_{\text{B3LYP}}$                                                                                                                                                              | $E_0$     | $H$       | $TCGFE$   |           |           |
| -650.6121139                                                                                                                                                                    | 0.240754  | 0.255415  | 0.197849  |           |           |
|                                                                                                                                                                                 |           | Atoms     | $x$       | $y$       | $z$       |
| 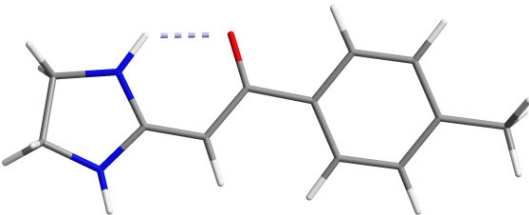<br><br>HOMO |           | N         | 3.104584  | 0.829310  | -0.025829 |
|                                                                                                                                                                                 |           | N         | 3.506576  | -1.349466 | 0.040972  |
|                                                                                                                                                                                 |           | O         | 0.585390  | 1.657436  | 0.089837  |
|                                                                                                                                                                                 |           | C         | 4.538740  | 0.726262  | 0.206457  |
|                                                                                                                                                                                 |           | H         | 4.788907  | 0.863106  | 1.266791  |
|                                                                                                                                                                                 |           | H         | 5.097765  | 1.455667  | -0.381630 |
|                                                                                                                                                                                 |           | C         | 4.804269  | -0.723187 | -0.240581 |
|                                                                                                                                                                                 |           | H         | 5.050626  | -0.760577 | -1.309921 |
|                                                                                                                                                                                 |           | H         | 5.606917  | -1.198282 | 0.324871  |
|                                                                                                                                                                                 |           | C         | 2.514948  | -0.388176 | -0.014275 |
|                                                                                                                                                                                 |           | C         | 1.152821  | -0.625227 | -0.027990 |
|                                                                                                                                                                                 |           | H         | 0.818963  | -1.650907 | -0.066037 |
|                                                                                                                                                                                 |           | C         | 0.224129  | 0.463578  | 0.032349  |
|                                                                                                                                                                                 |           | C         | -1.255014 | 0.174236  | 0.017443  |
|                                                                                                                                                                                 |           | C         | -1.809049 | -1.105237 | 0.129955  |
|                                                                                                                                                                                 |           | H         | -1.171589 | -1.973228 | 0.244648  |
|                                                                                                                                                                                 |           | C         | -3.188888 | -1.290048 | 0.111368  |
|                                                                                                                                                                                 |           | H         | -3.593414 | -2.293349 | 0.202127  |
|                                                                                                                                                                                 |           | C         | -4.062024 | -0.207392 | -0.021204 |
|                                                                                                                                                                                 |           | C         | -3.504851 | 1.072738  | -0.132036 |
| H                                                                                                                                                                               | -4.160365 | 1.931961  | -0.238488 |           |           |
| C                                                                                                                                                                               | -2.130311 | 1.260837  | -0.108700 |           |           |
| H                                                                                                                                                                               | -1.697627 | 2.250204  | -0.187680 |           |           |
| H                                                                                                                                                                               | 2.495015  | 1.628023  | 0.140797  |           |           |
| H                                                                                                                                                                               | 3.303110  | -2.255120 | -0.352991 |           |           |
| C                                                                                                                                                                               | -5.558419 | -0.402738 | -0.021875 |           |           |
| H                                                                                                                                                                               | -5.825501 | -1.446378 | -0.200934 |           |           |
| H                                                                                                                                                                               | -5.993482 | -0.110524 | 0.940184  |           |           |
| H                                                                                                                                                                               | -6.038674 | 0.207128  | -0.791911 |           |           |
| <br>LUMO                                                                                     |           |           |           |           |           |



**Table S7.** Cartesian coordinates, optimized geometry, and energies of compound **2e**

| <b>2-(Imidazolidin-2-ylidene)-1-(4-methoxyphenyl)ethan-1-one (2e)</b>                                                       |          |          |           |           |           |
|-----------------------------------------------------------------------------------------------------------------------------|----------|----------|-----------|-----------|-----------|
| $E_{\text{B3LYP}}$                                                                                                          | $E_0$    | $H$      | $TCGFE$   |           |           |
| -725.8385691                                                                                                                | 0.245850 | 0.261233 | 0.202148  |           |           |
|                                                                                                                             |          | Atoms    | $x$       | $y$       | $z$       |
| 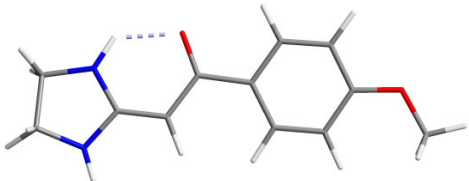                                           |          | N        | 3.555670  | 0.743621  | -0.038775 |
|                                                                                                                             |          | N        | 3.833961  | -1.453872 | 0.064677  |
|                                            |          | O        | 1.085975  | 1.711778  | 0.063010  |
|                                                                                                                             |          | C        | 4.980223  | 0.562780  | 0.202995  |
| <p style="text-align: center;">HOMO</p>  |          | H        | 5.233364  | 0.699042  | 1.262819  |
|                                                                                                                             |          | H        | 5.582674  | 1.251255  | -0.391613 |
|                                                                                                                             |          | C        | 5.164857  | -0.905066 | -0.223471 |
|                                                                                                                             |          | H        | 5.409715  | -0.970338 | -1.291896 |
|                                                                                                                             |          | H        | 5.939338  | -1.416468 | 0.349624  |
|                                                                                                                             |          | C        | 2.897141  | -0.438688 | -0.009093 |
|                                                                                                                             |          | C        | 1.524995  | -0.599994 | -0.022733 |
|                                                                                                                             |          | H        | 1.136881  | -1.607103 | -0.040722 |
|                                                                                                                             |          | C        | 0.656125  | 0.539883  | 0.020259  |
|                                                                                                                             |          | C        | -0.833622 | 0.336323  | 0.008574  |
|                                                                                                                             |          | C        | -1.462722 | -0.907600 | 0.091851  |
|                                                                                                                             |          | H        | -0.877878 | -1.814630 | 0.179530  |
|                                                                                                                             |          | C        | -2.851978 | -1.026573 | 0.079919  |
|                                                                                                                             |          | H        | -3.299797 | -2.008711 | 0.150934  |
|                                                                                                                             |          | C        | -3.643019 | 0.121129  | -0.019517 |
|                                                                                                                             |          | C        | -3.027208 | 1.377733  | -0.099349 |
|                                                                                                                             |          | H        | -3.657434 | 2.255975  | -0.173496 |
|                                                                                                                             |          | C        | -1.648847 | 1.476893  | -0.082206 |
|                                                                                                                             |          | H        | -1.160167 | 2.441283  | -0.137648 |
|                                                                                                                             |          | H        | 2.992702  | 1.577493  | 0.118756  |
|                                                                                                                             |          | H        | 3.581171  | -2.350647 | -0.321041 |
|                                                                                                                             |          | O        | -5.005209 | 0.124436  | -0.044324 |
|                                                                                                                             |          | C        | -5.688823 | -1.118245 | 0.025579  |
|                                                                                                                             |          | H        | -6.749686 | -0.876695 | -0.017309 |
|                                                                                                                             |          | H        | -5.431425 | -1.766893 | -0.819308 |
|                                                                                                                             |          | H        | -5.475737 | -1.642967 | 0.963712  |

**Table S8.** Cartesian coordinates, optimized geometry, and energies of compound **2f**

| <b>1-Phenyl-2-(tetrahydropyrimidin-2(1<i>H</i>)-ylidene)ethan-1-one (2f)</b>                                                                                                    |           |           |           |           |
|---------------------------------------------------------------------------------------------------------------------------------------------------------------------------------|-----------|-----------|-----------|-----------|
| $E_{\text{B3LYP}}$                                                                                                                                                              | $E_0$     | $H$       | $TCGFE$   |           |
| -650.6134471                                                                                                                                                                    | 0.242711  | 0.256594  | 0.202164  |           |
| 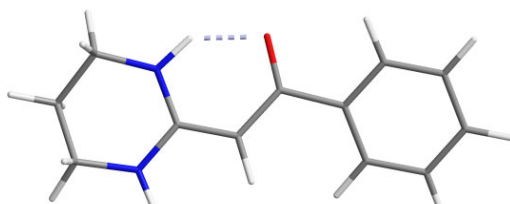<br><br>HOMO | Atoms     | $x$       | $y$       | $z$       |
|                                                                                                                                                                                 | N         | 2.224022  | -0.901758 | -0.093815 |
|                                                                                                                                                                                 | C         | 3.630810  | -1.257458 | -0.004276 |
|                                                                                                                                                                                 | C         | 4.505479  | -0.066634 | -0.393063 |
|                                                                                                                                                                                 | C         | 4.054609  | 1.169027  | 0.384120  |
|                                                                                                                                                                                 | N         | 2.629785  | 1.376915  | 0.162374  |
|                                                                                                                                                                                 | C         | 1.736812  | 0.344691  | 0.054939  |
|                                                                                                                                                                                 | C         | 0.358557  | 0.591908  | 0.061464  |
|                                                                                                                                                                                 | C         | -0.599409 | -0.452253 | -0.056376 |
|                                                                                                                                                                                 | C         | -2.067284 | -0.103449 | -0.029393 |
|                                                                                                                                                                                 | C         | -2.977217 | -1.137350 | 0.222853  |
|                                                                                                                                                                                 | C         | -4.344765 | -0.889515 | 0.260207  |
|                                                                                                                                                                                 | C         | -4.829497 | 0.397740  | 0.031421  |
|                                                                                                                                                                                 | C         | -3.935444 | 1.432074  | -0.237601 |
|                                                                                                                                                                                 | C         | -2.565549 | 1.183655  | -0.265927 |
|                                                                                                                                                                                 | O         | -0.295257 | -1.665093 | -0.157988 |
|                                                                                                                                                                                 | H         | 0.039733  | 1.615399  | 0.194556  |
|                                                                                                                                                                                 | H         | 1.477185  | -1.605760 | -0.147853 |
|                                                                                                                                                                                 | H         | 3.815400  | -2.103727 | -0.670510 |
|                                                                                                                                                                                 | H         | 3.882204  | -1.587070 | 1.013957  |
| H                                                                                                                                                                               | 4.410168  | 0.127032  | -1.465205 |           |
| H                                                                                                                                                                               | 5.554777  | -0.283576 | -0.179508 |           |
| H                                                                                                                                                                               | 4.590265  | 2.057286  | 0.040953  |           |
| H                                                                                                                                                                               | 4.279556  | 1.039654  | 1.453215  |           |
| H                                                                                                                                                                               | 2.238301  | 2.272040  | 0.404176  |           |
| H                                                                                                                                                                               | -2.579898 | -2.132052 | 0.380762  |           |
| H                                                                                                                                                                               | -5.035141 | -1.700828 | 0.464304  |           |
| H                                                                                                                                                                               | -5.896143 | 0.592427  | 0.055851  |           |
| H                                                                                                                                                                               | -4.305463 | 2.433091  | -0.431250 |           |
| H                                                                                                                                                                               | -1.888156 | 1.996117  | -0.499662 |           |
| <br>LUMO                                                                                     |           |           |           |           |

**Table S9.** Cartesian coordinates, optimized geometry, and energies of compound **2g**

| <b>1-(4-Fluorophenyl)-2-(tetrahydropyrimidin-2(1H)-ylidene)ethan-1-one (2g)</b>     |          |           |           |           |
|-------------------------------------------------------------------------------------|----------|-----------|-----------|-----------|
| $E_{\text{B3LYP}}$                                                                  | $E_0$    | $H$       | $TCGFE$   |           |
| -749.87872                                                                          | 0.234466 | 0.249209  | 0.192619  |           |
| 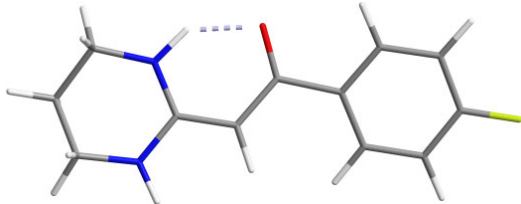   | Atoms    | $x$       | $y$       | $z$       |
|                                                                                     | N        | -2.668807 | 0.883942  | -0.078816 |
|                                                                                     | C        | -4.083808 | 1.207634  | 0.007918  |
|                                                                                     | C        | -4.454682 | -1.231769 | 0.368999  |
|                                                                                     | N        | -3.024459 | -1.405080 | 0.151720  |
|                                                                                     | C        | -2.154902 | -0.353000 | 0.054956  |
|                                                                                     | C        | -0.770832 | -0.570764 | 0.058146  |
|                                                                                     | C        | 0.163556  | 0.494728  | -0.048590 |
|                                                                                     | C        | 1.638461  | 0.180716  | -0.029749 |
|                                                                                     | C        | 2.524412  | 1.241830  | 0.196591  |
|                                                                                     | C        | 3.898787  | 1.039984  | 0.225174  |
|                                                                                     | C        | 4.385758  | -0.241006 | 0.010965  |
|                                                                                     | C        | 3.544039  | -1.315463 | -0.232199 |
|                                                                                     | C        | 2.169677  | -1.096090 | -0.249623 |
|                                                                                     | O        | -0.166200 | 1.702149  | -0.135939 |
|                                                                                     | H        | -0.431795 | -1.589232 | 0.179137  |
|                                                                                     | F        | 5.722638  | -0.448624 | 0.033067  |
|                                                                                     | C        | -4.930088 | 0.001778  | -0.396722 |
|                                                                                     | H        | -1.938406 | 1.605003  | -0.126459 |
|                                                                                     | H        | -4.283961 | 2.056240  | -0.650725 |
|                                                                                     | H        | -4.346083 | 1.521448  | 1.028254  |
|                                                                                     | H        | -4.968456 | -2.128101 | 0.013745  |
|                                                                                     | H        | -4.686482 | -1.119553 | 1.438422  |
|                                                                                     | H        | -2.614388 | -2.295476 | 0.379602  |
|                                                                                     | H        | 2.103337  | 2.228168  | 0.342912  |
|                                                                                     | H        | 4.591857  | 1.852521  | 0.405859  |
|                                                                                     | H        | 3.967150  | -2.296547 | -0.409308 |
|                                                                                     | H        | 1.515277  | -1.932262 | -0.461721 |
|                                                                                     | H        | -4.826935 | -0.178209 | -1.470511 |
|                                                                                     | H        | -5.984678 | 0.192917  | -0.184829 |
|   | HOMO     |           |           |           |
|  | LUMO     |           |           |           |

**Table S10.** Cartesian coordinates, optimized geometry, and energies of compound **2h**

| <b>1-(4-Chlorophenyl)-2-(tetrahydropyrimidin-2(1H)-ylidene)ethan-1-one (2h)</b>                                                                                                 |           |           |           |           |
|---------------------------------------------------------------------------------------------------------------------------------------------------------------------------------|-----------|-----------|-----------|-----------|
| $E_{\text{B3LYP}}$                                                                                                                                                              | $E_0$     | $H$       | $TCGFE$   |           |
| -1110.2364377                                                                                                                                                                   | 0.233066  | 0.248225  | 0.190276  |           |
| 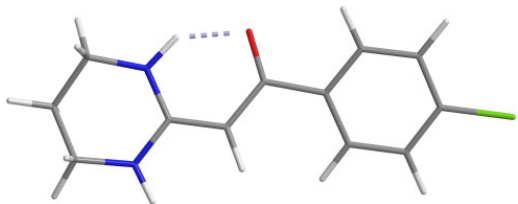<br><br>HOMO | Atoms     | $x$       | $y$       | $z$       |
|                                                                                                                                                                                 | N         | -3.111440 | 0.864242  | -0.077530 |
|                                                                                                                                                                                 | C         | -4.532862 | 1.161176  | 0.004174  |
|                                                                                                                                                                                 | C         | -4.857511 | -1.283224 | 0.378076  |
|                                                                                                                                                                                 | N         | -3.423222 | -1.429106 | 0.167257  |
|                                                                                                                                                                                 | C         | -2.574874 | -0.361946 | 0.060323  |
|                                                                                                                                                                                 | C         | -1.185946 | -0.553367 | 0.059426  |
|                                                                                                                                                                                 | C         | -0.274118 | 0.529328  | -0.054631 |
|                                                                                                                                                                                 | C         | 1.207132  | 0.242261  | -0.036907 |
|                                                                                                                                                                                 | C         | 2.073733  | 1.314814  | 0.203206  |
|                                                                                                                                                                                 | C         | 3.451445  | 1.137061  | 0.231888  |
|                                                                                                                                                                                 | C         | 3.972343  | -0.132301 | 0.002757  |
|                                                                                                                                                                                 | C         | 3.140068  | -1.215383 | -0.255986 |
|                                                                                                                                                                                 | C         | 1.762130  | -1.020602 | -0.272304 |
|                                                                                                                                                                                 | O         | -0.624263 | 1.730462  | -0.146887 |
|                                                                                                                                                                                 | H         | -0.826099 | -1.564098 | 0.185176  |
|                                                                                                                                                                                 | Cl        | 5.718052  | -0.371814 | 0.031397  |
|                                                                                                                                                                                 | C         | -5.354639 | -0.063166 | -0.395458 |
|                                                                                                                                                                                 | H         | -2.395161 | 1.598755  | -0.133047 |
|                                                                                                                                                                                 | H         | -4.747479 | 2.001949  | -0.659837 |
| H                                                                                                                                                                               | -4.802851 | 1.475794  | 1.022088  |           |
| H                                                                                                                                                                               | -5.351889 | -2.191392 | 0.025505  |           |
| H                                                                                                                                                                               | -5.094842 | -1.170717 | 1.446098  |           |
| H                                                                                                                                                                               | -2.996365 | -2.312222 | 0.392339  |           |
| H                                                                                                                                                                               | 1.637615  | 2.293057  | 0.360639  |           |
| H                                                                                                                                                                               | 4.115742  | 1.969508  | 0.425735  |           |
| H                                                                                                                                                                               | 3.564503  | -2.192533 | -0.447308 |           |
| H                                                                                                                                                                               | 1.124331  | -1.866566 | -0.496645 |           |
| H                                                                                                                                                                               | -5.245924 | -0.246937 | -1.468051 |           |
| H                                                                                                                                                                               | -6.413139 | 0.108679  | -0.186820 |           |
| <br>LUMO                                                                                     |           |           |           |           |

**Table S11.** Cartesian coordinates, optimized geometry, and energies of compound **2i**

| <b>2-(Tetrahydropyrimidin-2(1<i>H</i>)-ylidene)-1-(<i>p</i>-tolyl)ethan-1-one (2i)</b>                                                                                          |           |           |                |           |
|---------------------------------------------------------------------------------------------------------------------------------------------------------------------------------|-----------|-----------|----------------|-----------|
| $E_{\text{B3LYP}}$                                                                                                                                                              | $E_0$     | $H$       | $\text{TCGFE}$ |           |
| -689.9411536                                                                                                                                                                    | 0.269816  | 0.285615  | 0.226211       |           |
| 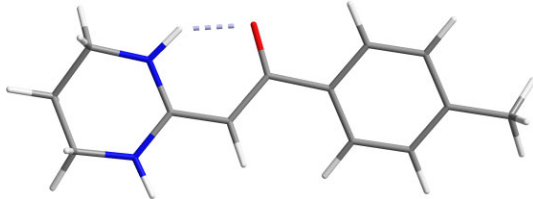<br><br>HOMO | Atoms     | $x$       | $y$            | $z$       |
|                                                                                                                                                                                 | N         | -2.701907 | 0.877971       | -0.086792 |
|                                                                                                                                                                                 | C         | -4.116575 | 1.196479       | 0.015523  |
|                                                                                                                                                                                 | C         | -4.473835 | -1.243581      | 0.383864  |
|                                                                                                                                                                                 | N         | -3.046819 | -1.413921      | 0.145263  |
|                                                                                                                                                                                 | C         | -2.181018 | -0.356855      | 0.047621  |
|                                                                                                                                                                                 | C         | -0.797357 | -0.567508      | 0.048194  |
|                                                                                                                                                                                 | C         | 0.133449  | 0.503227       | -0.058940 |
|                                                                                                                                                                                 | C         | 1.608351  | 0.194485       | -0.038547 |
|                                                                                                                                                                                 | C         | 2.495766  | 1.251744       | 0.198106  |
|                                                                                                                                                                                 | C         | 3.867438  | 1.040799       | 0.226122  |
|                                                                                                                                                                                 | C         | 4.408528  | -0.232054      | 0.007482  |
|                                                                                                                                                                                 | C         | 3.523138  | -1.282557      | -0.247749 |
|                                                                                                                                                                                 | C         | 2.146427  | -1.075976      | -0.268356 |
|                                                                                                                                                                                 | O         | -0.204731 | 1.708456       | -0.146167 |
|                                                                                                                                                                                 | H         | -0.451586 | -1.584070      | 0.166637  |
|                                                                                                                                                                                 | C         | -4.963222 | -0.012951      | -0.377698 |
|                                                                                                                                                                                 | C         | 5.899521  | -0.460255      | 0.061607  |
|                                                                                                                                                                                 | H         | -1.973510 | 1.601641       | -0.134449 |
|                                                                                                                                                                                 | H         | -4.327782 | 2.043504       | -0.641866 |
| H                                                                                                                                                                               | -4.369495 | 1.510689  | 1.038361       |           |
| H                                                                                                                                                                               | -4.990882 | -2.141934 | 0.038370       |           |
| H                                                                                                                                                                               | -4.691058 | -1.128809 | 1.456338       |           |
| H                                                                                                                                                                               | -2.630717 | -2.299204 | 0.382426       |           |
| H                                                                                                                                                                               | 2.076633  | 2.238519  | 0.349989       |           |
| H                                                                                                                                                                               | 4.533332  | 1.877400  | 0.415921       |           |
| H                                                                                                                                                                               | 3.916128  | -2.276163 | -0.440021      |           |
| H                                                                                                                                                                               | 1.496142  | -1.912761 | -0.493777      |           |
| H                                                                                                                                                                               | -4.871859 | -0.194187 | -1.452362      |           |
| H                                                                                                                                                                               | -6.016029 | 0.174551  | -0.153586      |           |
| H                                                                                                                                                                               | 6.444591  | 0.345839  | -0.436933      |           |
| H                                                                                                                                                                               | 6.254307  | -0.498534 | 1.097576       |           |
| H                                                                                                                                                                               | 6.177041  | -1.402467 | -0.415954      |           |
| <br>LUMO                                                                                     |           |           |                |           |

**Table S12.** Cartesian coordinates, optimized geometry, and energies of compound **2j**

| <b>1-(4-Methoxyphenyl)-2-(tetrahydropyrimidin-2(1H)-ylidene)ethan-1-one (2j)</b>                                            |           |           |           |           |           |
|-----------------------------------------------------------------------------------------------------------------------------|-----------|-----------|-----------|-----------|-----------|
| $E_{\text{B3LYP}}$                                                                                                          | $E_0$     | $H$       | $TCGFE$   |           |           |
| -765.1674207                                                                                                                | 0.274930  | 0.291458  | 0.230841  |           |           |
|                                                                                                                             |           | Atoms     | $x$       | $y$       | $z$       |
| 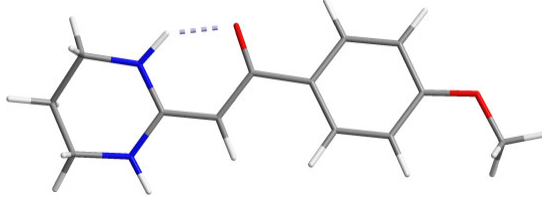                                           |           | N         | -3.146980 | 0.820326  | 0.110758  |
|                                                                                                                             |           | C         | -4.573314 | 1.027780  | 0.296051  |
|                                                                                                                             |           | C         | -4.804926 | -1.444335 | 0.071399  |
|                                                                                                                             |           | N         | -3.371451 | -1.479599 | -0.186195 |
|                                                                                                                             |           | C         | -2.561379 | -0.383915 | -0.036183 |
|                                                                                                                             |           | C         | -1.169815 | -0.517878 | -0.079738 |
|                                                                                                                             |           | C         | -0.294056 | 0.597810  | 0.050099  |
|                                                                                                                             |           | C         | 1.191936  | 0.369725  | 0.018029  |
|                                                                                                                             |           | C         | 2.025059  | 1.484566  | -0.169268 |
|                                                                                                                             |           | C         | 3.401191  | 1.355894  | -0.208450 |
|                                                                                                                             |           | C         | 3.995082  | 0.096973  | -0.046844 |
|                                                                                                                             |           | C         | 3.185720  | -1.023554 | 0.157786  |
|                                                                                                                             |           | C         | 1.799166  | -0.876113 | 0.185954  |
|                                                                                                                             |           | O         | -0.696847 | 1.779627  | 0.178877  |
|                                                                                                                             |           | H         | -0.774332 | -1.506496 | -0.263174 |
|                                                                                                                             |           | C         | -5.362352 | -0.094374 | -0.376661 |
|                                                                                                                             |           | O         | 5.357390  | 0.070985  | -0.099260 |
|                                                                                                                             |           | C         | 6.017996  | -1.176201 | 0.052865  |
|                                                                                                                             |           | H         | -2.457703 | 1.577198  | 0.201492  |
|                                                                                                                             |           | H         | -4.838726 | 1.996495  | -0.134035 |
| H                                                                                                                           | -4.824801 | 1.069270  | 1.365769  |           |           |
| H                                                                                                                           | -5.275756 | -2.259043 | -0.484199 |           |           |
| H                                                                                                                           | -5.025586 | -1.601560 | 1.137917  |           |           |
| H                                                                                                                           | -2.908428 | -2.372115 | -0.140232 |           |           |
| H                                                                                                                           | 1.554415  | 2.453272  | -0.279605 |           |           |
| H                                                                                                                           | 4.045977  | 2.213264  | -0.360849 |           |           |
| H                                                                                                                           | 3.617232  | -2.005113 | 0.301584  |           |           |
| H                                                                                                                           | 1.195603  | -1.757115 | 0.367504  |           |           |
| H                                                                                                                           | -5.271539 | -0.008429 | -1.463170 |           |           |
| H                                                                                                                           | -6.421227 | -0.020650 | -0.117445 |           |           |
| H                                                                                                                           | 7.082196  | -0.961657 | -0.032175 |           |           |
| H                                                                                                                           | 5.817170  | -1.621772 | 1.033800  |           |           |
| H                                                                                                                           | 5.728335  | -1.883796 | -0.732303 |           |           |
|  <p style="text-align: center;">HOMO</p>  |           |           |           |           |           |
|                                                                                                                             |           |           |           |           |           |
|  <p style="text-align: center;">LUMO</p> |           |           |           |           |           |
|                                                                                                                             |           |           |           |           |           |

**Table S13.** Cartesian coordinates, optimized geometry, and energies of compound **2k**

| <b>2-(1,3-Diazepan-2-ylidene)-1-phenylethan-1-one (2k)</b> |           |           |           |  |
|------------------------------------------------------------|-----------|-----------|-----------|--|
| $E_{\text{B3LYP}}$                                         | $E_0$     | $H$       | $TCGFE$   |  |
| -689.9353596                                               | 0.272233  | 0.286965  | 0.230764  |  |
|                                                            |           |           |           |  |
| Atoms                                                      |           |           |           |  |
| x                                                          |           |           |           |  |
| y                                                          |           |           |           |  |
| z                                                          |           |           |           |  |
| O                                                          | 0.646990  | -1.690792 | -0.021446 |  |
| N                                                          | -1.908006 | -0.912592 | -0.009322 |  |
| H                                                          | -1.150877 | -1.603395 | -0.050919 |  |
| N                                                          | -2.281047 | 1.393803  | 0.114218  |  |
| H                                                          | -1.806303 | 2.283037  | 0.153961  |  |
| C                                                          | 3.331747  | -1.110596 | -0.351495 |  |
| H                                                          | 2.948265  | -2.088847 | -0.612692 |  |
| C                                                          | 4.696402  | -0.846197 | -0.349114 |  |
| H                                                          | 5.398195  | -1.625619 | -0.625181 |  |
| C                                                          | 5.163606  | 0.417617  | 0.010843  |  |
| C                                                          | 4.256189  | 1.411808  | 0.370790  |  |
| H                                                          | 4.613584  | 2.392151  | 0.666421  |  |
| C                                                          | 2.888981  | 1.147956  | 0.359822  |  |
| H                                                          | 2.198310  | 1.924597  | 0.665293  |  |
| C                                                          | 2.408874  | -0.115145 | -0.007507 |  |
| C                                                          | 0.945531  | -0.477260 | -0.023592 |  |
| C                                                          | -0.024475 | 0.573687  | -0.070633 |  |
| H                                                          | 0.300915  | 1.595506  | -0.205176 |  |
| C                                                          | -1.395671 | 0.340890  | 0.004732  |  |
| C                                                          | -3.542230 | 1.436640  | -0.643013 |  |
| H                                                          | -3.376337 | 1.107896  | -1.677998 |  |
| H                                                          | -3.840149 | 2.486651  | -0.680579 |  |
| C                                                          | -4.673390 | 0.619015  | -0.016227 |  |
| H                                                          | -5.597840 | 0.846519  | -0.557966 |  |
| H                                                          | -4.815622 | 0.955728  | 1.016791  |  |
| C                                                          | -4.425832 | -0.890189 | -0.041621 |  |
| H                                                          | -5.267331 | -1.401556 | 0.437844  |  |
| H                                                          | -4.381041 | -1.246827 | -1.076614 |  |
| C                                                          | -3.138620 | -1.306471 | 0.676037  |  |
| H                                                          | -3.105188 | -2.394697 | 0.753349  |  |
| H                                                          | -3.145963 | -0.908411 | 1.699857  |  |
| H                                                          | 6.228153  | 0.624604  | 0.016763  |  |

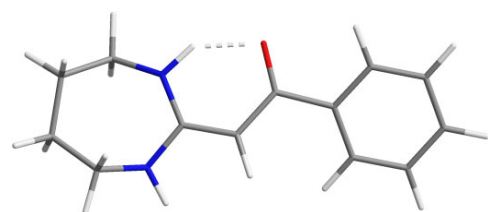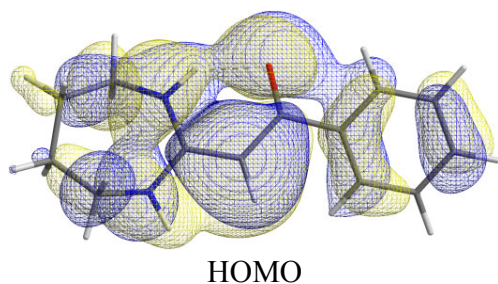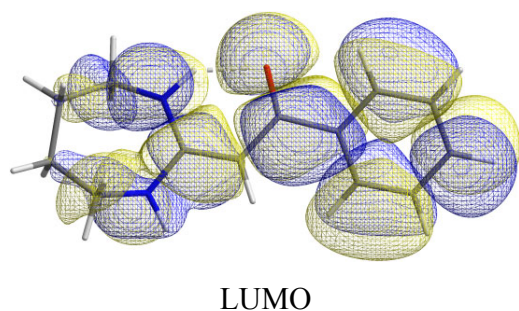

**Table S14.** Cartesian coordinates, optimized geometry, and energies of compound **2l**

| <b>2-(1,3-Diazepan-2-ylidene)-1-(4-fluorophenyl)ethan-1-one (2l)</b>                                                                                                                                                                                                                    |           |           |           |           |
|-----------------------------------------------------------------------------------------------------------------------------------------------------------------------------------------------------------------------------------------------------------------------------------------|-----------|-----------|-----------|-----------|
| $E_{\text{B3LYP}}$                                                                                                                                                                                                                                                                      | $E_0$     | $H$       | $TCGFE$   |           |
| -789.200519                                                                                                                                                                                                                                                                             | 0.263973  | 0.279561  | 0.221221  |           |
| 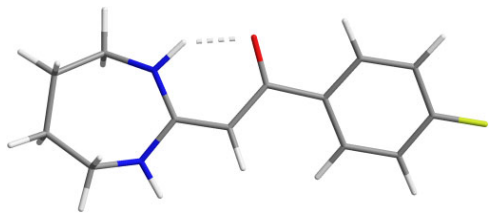<br> <p>HOMO</p><br> <p>LUMO</p> | Atoms     | $x$       | $y$       | $z$       |
|                                                                                                                                                                                                                                                                                         | O         | -0.192594 | 1.732344  | -0.037325 |
|                                                                                                                                                                                                                                                                                         | N         | 2.345810  | 0.901777  | -0.016686 |
|                                                                                                                                                                                                                                                                                         | H         | 1.603898  | 1.608071  | -0.066007 |
|                                                                                                                                                                                                                                                                                         | N         | 2.670593  | -1.410216 | 0.125255  |
|                                                                                                                                                                                                                                                                                         | H         | 2.178460  | -2.289456 | 0.173793  |
|                                                                                                                                                                                                                                                                                         | C         | -2.885201 | 1.222952  | -0.332432 |
|                                                                                                                                                                                                                                                                                         | H         | -2.478015 | 2.195806  | -0.576110 |
|                                                                                                                                                                                                                                                                                         | C         | -4.256843 | 1.004161  | -0.328938 |
|                                                                                                                                                                                                                                                                                         | H         | -4.961309 | 1.787623  | -0.579871 |
|                                                                                                                                                                                                                                                                                         | C         | -4.726454 | -0.256731 | 0.009848  |
|                                                                                                                                                                                                                                                                                         | C         | -3.870693 | -1.294629 | 0.345677  |
|                                                                                                                                                                                                                                                                                         | H         | -4.281340 | -2.258725 | 0.618922  |
|                                                                                                                                                                                                                                                                                         | C         | -2.499048 | -1.059713 | 0.329819  |
|                                                                                                                                                                                                                                                                                         | H         | -1.831216 | -1.862898 | 0.614807  |
|                                                                                                                                                                                                                                                                                         | C         | -1.985924 | 0.196970  | -0.014264 |
|                                                                                                                                                                                                                                                                                         | C         | -0.515744 | 0.524958  | -0.031507 |
|                                                                                                                                                                                                                                                                                         | C         | 0.431685  | -0.545773 | -0.069199 |
|                                                                                                                                                                                                                                                                                         | H         | 0.087370  | -1.562134 | -0.197714 |
|                                                                                                                                                                                                                                                                                         | C         | 1.807994  | -0.340294 | 0.006580  |
|                                                                                                                                                                                                                                                                                         | C         | 3.932953  | -1.485477 | -0.627782 |
|                                                                                                                                                                                                                                                                                         | H         | 3.776146  | -1.161560 | -1.665631 |
|                                                                                                                                                                                                                                                                                         | H         | 4.208641  | -2.541790 | -0.656169 |
|                                                                                                                                                                                                                                                                                         | C         | 5.079278  | -0.686542 | -0.004719 |
|                                                                                                                                                                                                                                                                                         | H         | 6.000118  | -0.938197 | -0.541836 |
|                                                                                                                                                                                                                                                                                         | H         | 5.211706  | -1.016892 | 1.031618  |
|                                                                                                                                                                                                                                                                                         | C         | 4.863430  | 0.827184  | -0.044441 |
|                                                                                                                                                                                                                                                                                         | H         | 5.714237  | 1.325265  | 0.432479  |
| H                                                                                                                                                                                                                                                                                       | 4.828649  | 1.175237  | -1.082753 |           |
| C                                                                                                                                                                                                                                                                                       | 3.583824  | 1.276812  | 0.666608  |           |
| H                                                                                                                                                                                                                                                                                       | 3.572468  | 2.366170  | 0.733200  |           |
| H                                                                                                                                                                                                                                                                                       | 3.580954  | 0.888730  | 1.694258  |           |
| F                                                                                                                                                                                                                                                                                       | -6.060043 | -0.479799 | 0.019348  |           |



**Table S15.** Cartesian coordinates, optimized geometry, and energies of compound **2m**

| <b>1-(4-Chlorophenyl)-2-(1,3-diazepan-2-ylidene)ethan-1-one (2m)</b>                                                                                                            |           |                                                                                             |           |           |           |           |           |
|---------------------------------------------------------------------------------------------------------------------------------------------------------------------------------|-----------|---------------------------------------------------------------------------------------------|-----------|-----------|-----------|-----------|-----------|
| $E_{\text{B3LYP}}$                                                                                                                                                              | $E_0$     | $H$                                                                                         | $TCGFE$   |           |           |           |           |
| -1149.5580754                                                                                                                                                                   | 0.262570  | 0.278572                                                                                    | 0.218892  |           |           |           |           |
|                                                                                                                                                                                 |           | Atoms                                                                                       | $x$       | $y$       | $z$       |           |           |
| 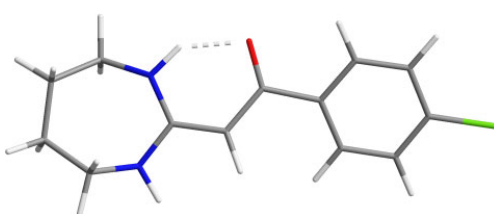<br><br>HOMO |           | O                                                                                           | 0.259490  | 1.766846  | -0.029028 |           |           |
|                                                                                                                                                                                 |           | N                                                                                           | 2.782812  | 0.889682  | -0.013113 |           |           |
|                                                                                                                                                                                 |           | H                                                                                           | 2.053863  | 1.609390  | -0.060742 |           |           |
|                                                                                                                                                                                 |           | N                                                                                           | 3.065906  | -1.428011 | 0.124014  |           |           |
|                                                                                                                                                                                 |           | H                                                                                           | 2.557873  | -2.298095 | 0.173453  |           |           |
|                                                                                                                                                                                 |           | C                                                                                           | -2.440055 | 1.303043  | -0.335268 |           |           |
|                                                                                                                                                                                 |           | H                                                                                           | -2.017043 | 2.268911  | -0.580491 |           |           |
|                                                                                                                                                                                 |           | C                                                                                           | -3.815483 | 1.108782  | -0.336416 |           |           |
|                                                                                                                                                                                 |           | H                                                                                           | -4.490928 | 1.914235  | -0.594807 |           |           |
|                                                                                                                                                                                 |           | C                                                                                           | -4.319964 | -0.142607 | 0.003793  |           |           |
|                                                                                                                                                                                 |           | C                                                                                           | -3.473770 | -1.191305 | 0.346054  |           |           |
|                                                                                                                                                                                 |           | H                                                                                           | -3.886001 | -2.153029 | 0.622950  |           |           |
|                                                                                                                                                                                 |           | C                                                                                           | -2.098097 | -0.981348 | 0.334381  |           |           |
|                                                                                                                                                                                 |           | H                                                                                           | -1.447731 | -1.797067 | 0.624613  |           |           |
|                                                                                                                                                                                 |           | C                                                                                           | -1.560347 | 0.263422  | -0.011617 |           |           |
|                                                                                                                                                                                 |           | C                                                                                           | -0.083149 | 0.564961  | -0.025612 |           |           |
|                                                                                                                                                                                 |           | H                                                                                           | 0.842915  | -0.522629 | -0.064149 |           |           |
|                                                                                                                                                                                 |           | H                                                                                           | 0.479518  | -1.532266 | -0.192932 |           |           |
|                                                                                                                                                                                 |           | <br>LUMO |           | C         | 2.223893  | -0.342318 | 0.009137  |
|                                                                                                                                                                                 |           |                                                                                             |           | C         | 4.326590  | -1.526526 | -0.629349 |
| H                                                                                                                                                                               | 4.174714  |                                                                                             |           | -1.200076 | -1.667081 |           |           |
| H                                                                                                                                                                               | 4.582537  |                                                                                             |           | -2.587740 | -0.657529 |           |           |
| C                                                                                                                                                                               | 5.487660  |                                                                                             |           | -0.748342 | -0.007742 |           |           |
| H                                                                                                                                                                               | 6.403204  |                                                                                             |           | -1.017482 | -0.545349 |           |           |
| H                                                                                                                                                                               | 5.614950  |                                                                                             |           | -1.079750 | 1.028872  |           |           |
| C                                                                                                                                                                               | 5.299398  |                                                                                             |           | 0.768995  | -0.049498 |           |           |
| H                                                                                                                                                                               | 6.160245  |                                                                                             |           | 1.252314  | 0.424472  |           |           |
| H                                                                                                                                                                               | 5.268491  |                                                                                             |           | 1.115946  | -1.088308 |           |           |
| C                                                                                                                                                                               | 4.030442  | 1.243183                                                                                    | 0.664564  |           |           |           |           |
| H                                                                                                                                                                               | 4.038950  | 2.332637                                                                                    | 0.729138  |           |           |           |           |
| H                                                                                                                                                                               | 4.023634  | 0.857058                                                                                    | 1.692894  |           |           |           |           |
| Cl                                                                                                                                                                              | -6.061966 | -0.402077                                                                                   | 0.009242  |           |           |           |           |

**Table S16.** Cartesian coordinates, optimized geometry, and energies of compound **2n**

| <b>2-(1,3-Diazepan-2-ylidene)-1-(<i>p</i>-tolyl)ethan-1-one (2n)</b>                            |           |           |           |           |           |
|-------------------------------------------------------------------------------------------------|-----------|-----------|-----------|-----------|-----------|
| $E_{\text{B3LYP}}$                                                                              | $E_0$     | $H$       | $TCGFE$   |           |           |
| -729.2631458                                                                                    | 0.299254  | 0.315943  | 0.254335  |           |           |
|                                                                                                 |           | Atoms     | $x$       | $y$       | $z$       |
| 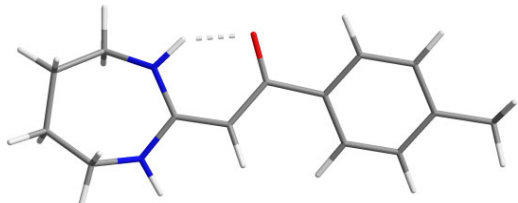               |           | O         | 0.156929  | -1.738712 | -0.039091 |
|                                                                                                 |           | N         | -2.377078 | -0.899008 | -0.018170 |
|                                                                                                 |           | H         | -1.636378 | -1.607178 | -0.066168 |
|                                                                                                 |           | N         | -2.693720 | 1.414285  | 0.128554  |
|                                                                                                 |           | H         | -2.198058 | 2.291652  | 0.175656  |
|                                                                                                 |           | C         | 2.858782  | -1.232676 | -0.336577 |
|                                                                                                 |           | H         | 2.453820  | -2.205846 | -0.584427 |
|                                                                                                 |           | C         | 4.227987  | -1.004163 | -0.333851 |
|                                                                                                 |           | H         | 4.905514  | -1.810937 | -0.596542 |
|                                                                                                 |           | C         | 4.751272  | 0.250203  | 0.002580  |
|                                                                                                 |           | C         | 3.851080  | 1.267182  | 0.333298  |
|                                                                                                 |           | H         | 4.230325  | 2.247222  | 0.605957  |
|                                                                                                 |           | C         | 2.477381  | 1.043988  | 0.323701  |
|                                                                                                 |           | H         | 1.813249  | 1.851887  | 0.606437  |
|                                                                                                 |           | C         | 1.957706  | -0.209783 | -0.016473 |
|                                                                                                 |           | C         | 0.487525  | -0.533189 | -0.033342 |
|                                                                                                 |           | C         | -0.457736 | 0.541699  | -0.070063 |
|                                                                                                 |           | H         | -0.108647 | 1.556817  | -0.195533 |
|                                                                                                 |           | C         | -1.833316 | 0.341487  | 0.006923  |
|                                                                                                 |           | C         | -3.953799 | 1.493117  | -0.627381 |
| H                                                                                               | -3.796918 | 1.166662  | -1.664506 |           |           |
| H                                                                                               | -4.226156 | 2.550319  | -0.658210 |           |           |
| C                                                                                               | -5.103902 | 0.699440  | -0.004131 |           |           |
| H                                                                                               | -6.023532 | 0.952962  | -0.542613 |           |           |
| H                                                                                               | -5.235929 | 1.032731  | 1.031347  |           |           |
| C                                                                                               | -4.893544 | -0.815291 | -0.039729 |           |           |
| H                                                                                               | -5.745649 | -1.308800 | 0.439821  |           |           |
| H                                                                                               | -4.861581 | -1.166180 | -1.077203 |           |           |
| C                                                                                               | -3.613893 | -1.268019 | 0.669742  |           |           |
| H                                                                                               | -3.606918 | -2.357356 | 0.738618  |           |           |
| H                                                                                               | -3.607749 | -0.877931 | 1.696726  |           |           |
| C                                                                                               | 6.241571  | 0.485345  | 0.037609  |           |           |
| H                                                                                               | 6.482526  | 1.543870  | -0.083138 |           |           |
| H                                                                                               | 6.668043  | 0.158267  | 0.992545  |           |           |
| H                                                                                               | 6.751506  | -0.071446 | -0.752564 |           |           |
|  <p>HOMO</p>  |           |           |           |           |           |
|                                                                                                 |           |           |           |           |           |
|  <p>LUMO</p> |           |           |           |           |           |
|                                                                                                 |           |           |           |           |           |

**Table S17.** Cartesian coordinates, optimized geometry, and energies of compound **2o**

| <b>2-(1,3-Diazepan-2-ylidene)-1-(4-methoxyphenyl)ethan-1-one (2o)</b>                                                       |           |           |                |
|-----------------------------------------------------------------------------------------------------------------------------|-----------|-----------|----------------|
| $E_{\text{B3LYP}}$                                                                                                          | $E_0$     | $H$       | $\text{TCGFE}$ |
| -804.4896206                                                                                                                | 0.304396  | 0.321783  | 0.259399       |
| 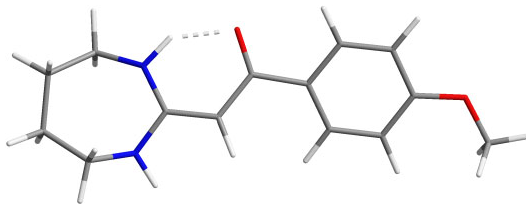                                           |           |           |                |
|  <p style="text-align: center;">HOMO</p>  |           |           |                |
|  <p style="text-align: center;">LUMO</p> |           |           |                |
| Atoms                                                                                                                       | $x$       | $y$       | $z$            |
| O                                                                                                                           | 0.326570  | 1.826004  | -0.025772      |
| N                                                                                                                           | 2.815571  | 0.865792  | 0.000473       |
| H                                                                                                                           | 2.109179  | 1.608751  | -0.040624      |
| N                                                                                                                           | 3.020719  | -1.461814 | 0.112840       |
| H                                                                                                                           | 2.483704  | -2.315281 | 0.142011       |
| C                                                                                                                           | -2.395715 | 1.470804  | -0.326365      |
| H                                                                                                                           | -1.940379 | 2.430664  | -0.534876      |
| C                                                                                                                           | -3.769697 | 1.321140  | -0.336412      |
| H                                                                                                                           | -4.428391 | 2.151141  | -0.562539      |
| C                                                                                                                           | -4.343853 | 0.075279  | -0.047632      |
| C                                                                                                                           | -3.516887 | -1.010297 | 0.253753       |
| H                                                                                                                           | -3.933549 | -1.978826 | 0.495647       |
| C                                                                                                                           | -2.132576 | -0.843094 | 0.251607       |
| H                                                                                                                           | -1.513980 | -1.693723 | 0.510631       |
| C                                                                                                                           | -1.545575 | 0.389372  | -0.042074      |
| C                                                                                                                           | -0.064635 | 0.638276  | -0.042248      |
| C                                                                                                                           | 0.830019  | -0.480774 | -0.089212      |
| H                                                                                                                           | 0.435580  | -1.476238 | -0.236786      |
| C                                                                                                                           | 2.212005  | -0.347455 | 0.002024       |
| C                                                                                                                           | 4.279114  | -1.587357 | -0.639467      |
| H                                                                                                                           | 4.143826  | -1.233666 | -1.670660      |
| H                                                                                                                           | 4.500708  | -2.655667 | -0.689610      |
| C                                                                                                                           | 5.462364  | -0.861861 | 0.004590       |
| H                                                                                                                           | 6.372179  | -1.148766 | -0.533901      |
| H                                                                                                                           | 5.572016  | -1.220663 | 1.034142       |
| C                                                                                                                           | 5.324963  | 0.661728  | -0.002947      |
| H                                                                                                                           | 6.195741  | 1.104448  | 0.492451       |
| H                                                                                                                           | 5.318757  | 1.033290  | -1.033710      |
| C                                                                                                                           | 4.062222  | 1.162704  | 0.704997       |
| H                                                                                                                           | 4.107251  | 2.249757  | 0.793443       |
| H                                                                                                                           | 4.028864  | 0.755425  | 1.724793       |
| O                                                                                                                           | -5.704856 | 0.026925  | -0.081328      |
| C                                                                                                                           | -6.347829 | -1.207214 | 0.202151       |
| H                                                                                                                           | -7.415525 | -1.013607 | 0.112224       |
| H                                                                                                                           | -6.059720 | -1.984501 | -0.514499      |
| H                                                                                                                           | -6.127517 | -1.551325 | 1.218871       |

**Table S18.** Cartesian coordinates, optimized geometry, and energies of **Int 2a**

| <b>3-(2-Chloro-6-methylquinolin-3-yl)-3-hydroxy-2-(imidazolidin-2-ylidene)-1-(<i>p</i>-tolyl)propan-1-one (Int 2a)</b> |          |           |           |           |
|------------------------------------------------------------------------------------------------------------------------|----------|-----------|-----------|-----------|
| $E_{\text{B3LYP}}$                                                                                                     | $E_0$    | $H$       | $TCGFE$   |           |
| -1586.2693512                                                                                                          | 0.352743 | 0.376069  | 0.299358  |           |
| 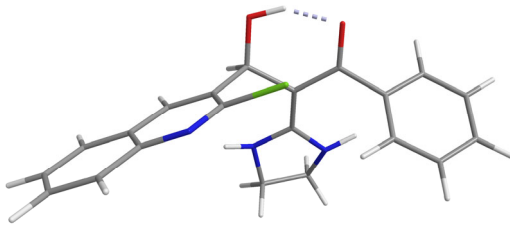                                      | Atoms    | $x$       | $y$       | $z$       |
|                                                                                                                        | C        | -6.060117 | 0.772791  | -0.435400 |
|                                                                                                                        | C        | -6.016799 | -0.294117 | -1.362350 |
|                                                                                                                        | C        | -4.884931 | -1.064833 | -1.491286 |
|                                                                                                                        | C        | -3.747967 | -0.793215 | -0.694057 |
|                                                                                                                        | C        | -3.785819 | 0.285565  | 0.233768  |
|                                                                                                                        | C        | -4.966744 | 1.058202  | 0.348772  |
|                                                                                                                        | N        | -2.642346 | -1.581372 | -0.823468 |
|                                                                                                                        | C        | -1.483736 | -0.257703 | 0.848388  |
|                                                                                                                        | C        | -2.612828 | 0.515150  | 0.995814  |
|                                                                                                                        | C        | 1.126535  | 1.559662  | 0.354447  |
|                                                                                                                        | C        | 1.038020  | 0.312296  | 0.958755  |
|                                                                                                                        | N        | 2.201534  | 2.159313  | -0.255826 |
|                                                                                                                        | C        | 2.163284  | -0.596620 | 1.045500  |
|                                                                                                                        | C        | 3.298571  | -0.554899 | 0.050744  |
|                                                                                                                        | C        | 4.611803  | -0.645211 | 0.527633  |
|                                                                                                                        | C        | 5.682000  | -0.696370 | -0.360994 |
|                                                                                                                        | C        | 5.447593  | -0.697298 | -1.735741 |
|                                                                                                                        | C        | 4.140682  | -0.641183 | -2.217552 |
|                                                                                                                        | C        | 3.070899  | -0.560088 | -1.330098 |
|                                                                                                                        | O        | 2.252256  | -1.475395 | 1.918225  |
|                                                                                                                        | C        | 1.960747  | 3.587829  | -0.448948 |
|                                                                                                                        | C        | 0.430711  | 3.616149  | -0.517579 |
|                                                                                                                        | H        | -6.963390 | 1.365034  | -0.343779 |
|                                                                                                                        | H        | -6.887844 | -0.506180 | -1.971894 |
|                                                                                                                        | H        | -4.828924 | -1.891999 | -2.188063 |
|                                                                                                                        | H        | -4.997739 | 1.873926  | 1.063714  |
|                                                                                                                        | H        | -2.612610 | 1.315752  | 1.731998  |
|                                                                                                                        | H        | 4.777191  | -0.689996 | 1.597526  |
|                                                                                                                        | H        | 6.696448  | -0.753552 | 0.017535  |
|                                                                                                                        | H        | 6.279812  | -0.753920 | -2.428578 |
|                                                                                                                        | H        | 3.953940  | -0.666132 | -3.285332 |
|                                                                                                                        | H        | 2.054410  | -0.521375 | -1.702223 |
|                                                                                                                        | H        | 2.433326  | 3.951194  | -1.362373 |
|                                      | HOMO     |           |           |           |
|                                     | HOMO-1   |           |           |           |
|                                     | LUMO     |           |           |           |

|                                                                                                 |           |           |           |           |
|-------------------------------------------------------------------------------------------------|-----------|-----------|-----------|-----------|
| 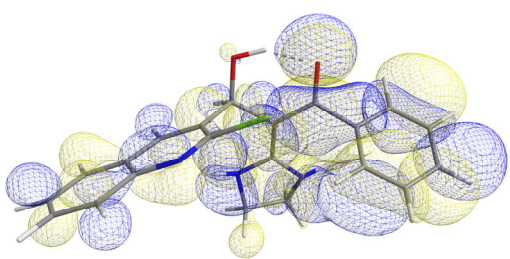 <p>LUMO+1</p> | H         | 2.326406  | 4.179206  | 0.400708  |
|                                                                                                 | H         | 0.005758  | 4.541736  | -0.127562 |
|                                                                                                 | H         | 0.082353  | 3.469630  | -1.547449 |
|                                                                                                 | C         | -0.262947 | 0.023764  | 1.740743  |
|                                                                                                 | H         | 3.130971  | 1.817602  | -0.070712 |
|                                                                                                 | N         | 0.087746  | 2.470513  | 0.330940  |
|                                                                                                 | O         | -0.171756 | -0.999842 | 2.701798  |
|                                                                                                 | H         | 0.721357  | -1.395733 | 2.620814  |
|                                                                                                 | H         | -0.520039 | 0.954891  | 2.269909  |
|                                                                                                 | Cl        | -0.250486 | -2.443076 | -0.303780 |
|                                                                                                 | C         | -1.601708 | -1.328916 | -0.094546 |
| H                                                                                               | -0.849192 | 2.099205  | 0.272219  |           |

**Table S19.** Cartesian coordinates, optimized geometry, and energies of **Int 2b**

| 3-(2-Chloro-6-methylquinolin-3-yl)-3-hydroxy-2-(tetrahydropyrimidin-2(1 <i>H</i> )-ylidene)-1-( <i>p</i> -tolyl)propan-1-one ( <b>Int 2b</b> )                                         |           |           |           |           |
|----------------------------------------------------------------------------------------------------------------------------------------------------------------------------------------|-----------|-----------|-----------|-----------|
| $E_{\text{B3LYP}}$                                                                                                                                                                     | $E_0$     | $H$       | $TCGFE$   |           |
| -1586.2693512                                                                                                                                                                          | 0.352743  | 0.376069  | 0.299358  |           |
| 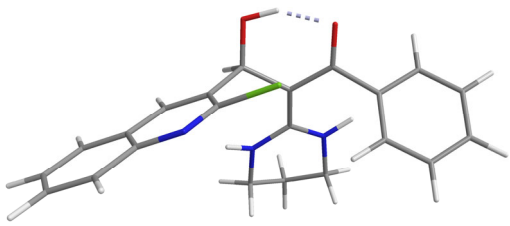<br> <p>HOMO</p> | Atoms     | $x$       | $y$       | $z$       |
|                                                                                                                                                                                        | C         | -6.118268 | 0.783900  | -0.440086 |
| C                                                                                                                                                                                      | -6.100964 | -0.281882 | -1.369309 |           |
| C                                                                                                                                                                                      | -4.987122 | -1.077755 | -1.502139 |           |
| C                                                                                                                                                                                      | -3.842752 | -0.833762 | -0.706418 |           |
| C                                                                                                                                                                                      | -5.017132 | 1.042753  | 0.342410  |           |
| N                                                                                                                                                                                      | -2.755543 | -1.645887 | -0.839611 |           |
| C                                                                                                                                                                                      | -1.563849 | -0.355250 | 0.836540  |           |
| C                                                                                                                                                                                      | -2.675579 | 0.443697  | 0.984427  |           |
| C                                                                                                                                                                                      | 0.989700  | 0.150517  | 1.002354  |           |
| C                                                                                                                                                                                      | 2.037045  | -0.840477 | 1.049848  |           |
| C                                                                                                                                                                                      | 3.170221  | -0.854168 | 0.045434  |           |
| C                                                                                                                                                                                      | 4.458475  | -1.163568 | 0.497794  |           |
| C                                                                                                                                                                                      | 5.517078  | -1.267008 | -0.400422 |           |
| C                                                                                                                                                                                      | 5.293233  | -1.098337 | -1.766132 |           |
| C                                                                                                                                                                                      | 4.006537  | -0.824637 | -2.228807 |           |
| C                                                                                                                                                                                      | 2.951955  | -0.696234 | -1.328658 |           |
| O                                                                                                                                                                                      | 2.054320  | -1.778454 | 1.869120  |           |
| H                                                                                                                                                                                      | 4.609686  | -1.336225 | 1.556628  |           |
| H                                                                                                                                                                                      | 6.512923  | -1.495360 | -0.037176 |           |

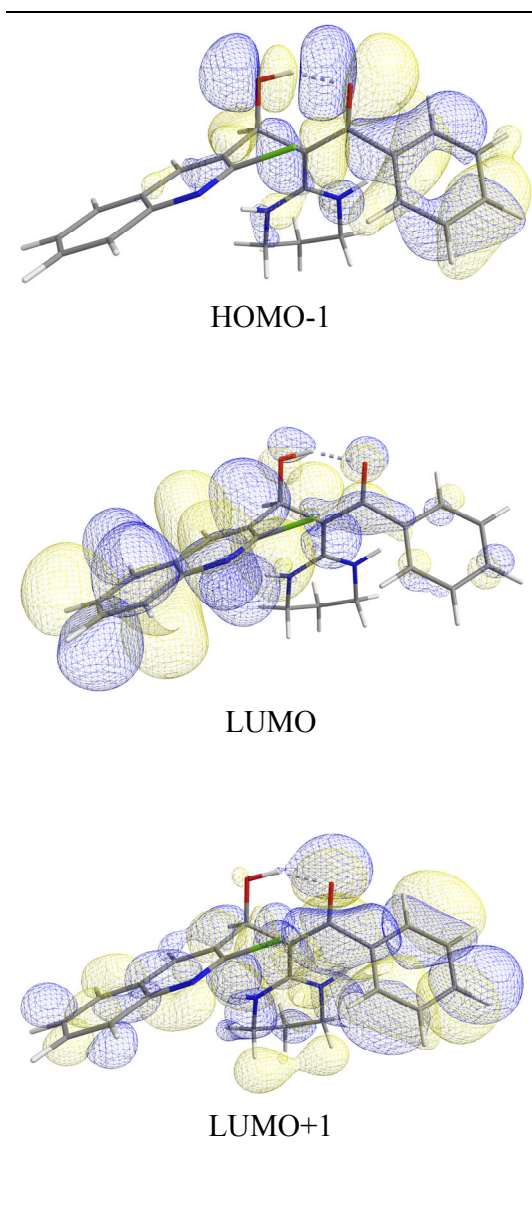

|    |           |           |           |
|----|-----------|-----------|-----------|
| H  | 6.114126  | -1.194770 | -2.467982 |
| H  | 3.822450  | -0.723421 | -3.292718 |
| H  | 1.948412  | -0.501034 | -1.688117 |
| C  | -0.342187 | -0.101156 | 1.743551  |
| Cl | -0.384716 | -2.563479 | -0.328013 |
| C  | -1.707981 | -1.420281 | -0.110703 |
| C  | -3.854407 | 0.243382  | 0.223736  |
| H  | -7.007753 | 1.396236  | -0.345502 |
| H  | -6.977870 | -0.472958 | -1.977419 |
| H  | -4.951207 | -1.904550 | -2.200695 |
| H  | -5.028077 | 1.857350  | 1.059250  |
| H  | -2.655113 | 1.244875  | 1.719502  |
| O  | -0.294464 | -1.116345 | 2.716718  |
| H  | 0.558510  | -1.588677 | 2.598241  |
| C  | 1.182834  | 1.433456  | 0.458668  |
| N  | 0.113971  | 2.258725  | 0.244267  |
| N  | 2.409256  | 1.981015  | 0.229582  |
| C  | 0.175238  | 3.583577  | -0.373826 |
| C  | 2.611752  | 3.172764  | -0.583253 |
| C  | 1.556391  | 4.205001  | -0.198939 |
| H  | -0.058985 | 3.506584  | -1.444158 |
| H  | 2.551993  | 2.943543  | -1.657116 |
| H  | 1.638967  | 5.097811  | -0.823017 |
| H  | 3.204271  | 1.388943  | 0.403217  |
| H  | -0.779404 | 1.794709  | 0.186189  |
| H  | -0.592899 | 4.213820  | 0.082329  |
| H  | 3.617155  | 3.546356  | -0.383267 |
| H  | 1.708236  | 4.502574  | 0.842086  |
| H  | -0.589197 | 0.837559  | 2.263158  |

**Table S20.** Cartesian coordinates, optimized geometry, and energies of **Int 2c**

| <b>3-(2-Chloroquinolin-3-yl)-2-(1,3-diazepan-2-ylidene)-3-hydroxy-1-phenylpropan-1-one (Int 2c)</b> |          |          |           |           |           |
|-----------------------------------------------------------------------------------------------------|----------|----------|-----------|-----------|-----------|
| $E_{\text{B3LYP}}$                                                                                  | $E_0$    | $H$      | $TCGFE$   |           |           |
| -1664.9124809                                                                                       | 0.410608 | 0.436129 | 0.353866  |           |           |
| 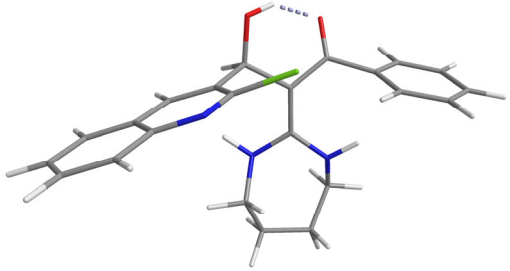                   |          | Atoms    | $x$       | $y$       | $z$       |
|                                                                                                     |          | C        | -6.232741 | 0.431168  | 0.244242  |
|                                                                                                     |          | C        | -6.213802 | -0.087673 | -1.071308 |
|                   |          | C        | -5.069711 | -0.650761 | -1.586234 |
|                                                                                                     |          | C        | -3.895004 | -0.713895 | -0.799483 |
|                                                                                                     |          | C        | -3.908744 | -0.184370 | 0.521621  |
| <p style="text-align: center;">HOMO</p>                                                             |          | C        | -5.103430 | 0.383677  | 1.027523  |
|                                                                                                     |          | N        | -2.777613 | -1.296255 | -1.319359 |
|                                                                                                     |          | C        | -1.557487 | -0.811547 | 0.718628  |
|                  |          | C        | -2.698562 | -0.262292 | 1.253334  |
|                                                                                                     |          | C        | 0.980435  | -0.304526 | 0.930859  |
|                                                                                                     |          | C        | 2.221449  | -1.039709 | 1.110037  |
| <p style="text-align: center;">HOMO-1</p>                                                           |          | C        | 3.428067  | -0.854080 | 0.221417  |
|                                                                                                     |          | C        | 4.691427  | -0.718064 | 0.809207  |
|                                                                                                     |          | C        | 5.832121  | -0.650964 | 0.016862  |
|                  |          | C        | 5.729523  | -0.758184 | -1.371014 |
|                                                                                                     |          | C        | 4.480181  | -0.928621 | -1.962102 |
|                                                                                                     |          | C        | 3.331703  | -0.969636 | -1.171323 |
| <p style="text-align: center;">LUMO</p>                                                             |          | O        | 2.357366  | -1.897343 | 1.999406  |
|                                                                                                     |          | H        | -7.146136 | 0.865367  | 0.634359  |
|                                                                                                     |          | H        | -7.113574 | -0.043310 | -1.674354 |
|                                                                                                     |          | H        | -5.031637 | -1.062183 | -2.587278 |
|                                                                                                     |          | H        | -5.115657 | 0.777449  | 2.038603  |
|                                                                                                     |          | H        | -2.677542 | 0.113940  | 2.273184  |
|                                                                                                     |          | H        | 4.764301  | -0.678438 | 1.889292  |
|                                                                                                     |          | H        | 6.804812  | -0.529840 | 0.480530  |
|                                                                                                     |          | H        | 6.621425  | -0.720306 | -1.986316 |
|                                                                                                     |          | H        | 4.396486  | -1.037995 | -3.037554 |
|                                                                                                     |          | H        | 2.358205  | -1.108985 | -1.627748 |
|                                                                                                     |          | C        | -0.295423 | -0.911266 | 1.578255  |
|                                                                                                     |          | O        | -0.189516 | -2.276827 | 1.907305  |
|                                                                                                     |          | H        | 0.735257  | -2.414742 | 2.193396  |
|                                                                                                     |          | H        | -0.519747 | -0.338734 | 2.499876  |
|                                                                                                     |          | Cl       | -0.347815 | -2.197149 | -1.354797 |

|                                                                                                                             |           |           |           |           |
|-----------------------------------------------------------------------------------------------------------------------------|-----------|-----------|-----------|-----------|
| 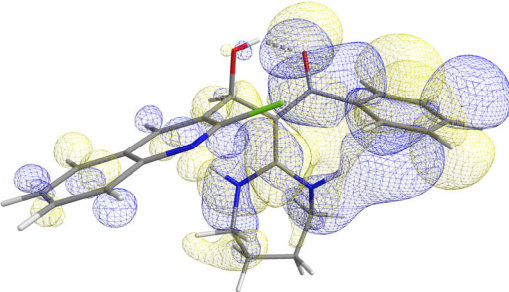 <p style="text-align: center;">LUMO+1</p> | C         | -1.700973 | -1.349040 | -0.600316 |
|                                                                                                                             | C         | 0.941490  | 1.021451  | 0.488529  |
|                                                                                                                             | C         | 2.341379  | 3.031367  | 0.035587  |
|                                                                                                                             | C         | -0.666702 | 2.842618  | -0.113802 |
|                                                                                                                             | C         | 1.488388  | 4.105055  | -0.646525 |
|                                                                                                                             | H         | 2.357191  | 3.200315  | 1.119135  |
|                                                                                                                             | H         | 3.371160  | 3.107513  | -0.319496 |
|                                                                                                                             | C         | 0.066490  | 4.186846  | -0.089295 |
|                                                                                                                             | H         | -0.671843 | 2.437006  | -1.131801 |
|                                                                                                                             | H         | -1.707870 | 2.989150  | 0.180473  |
|                                                                                                                             | H         | 1.457625  | 3.893158  | -1.720914 |
|                                                                                                                             | H         | 1.986135  | 5.073135  | -0.525108 |
|                                                                                                                             | H         | 0.089559  | 4.553229  | 0.943209  |
|                                                                                                                             | H         | -0.515352 | 4.908792  | -0.672103 |
|                                                                                                                             | N         | -0.111480 | 1.843897  | 0.811833  |
|                                                                                                                             | N         | 1.908357  | 1.655297  | -0.250248 |
| H                                                                                                                           | 2.640047  | 1.053321  | -0.590138 |           |
| H                                                                                                                           | -0.788080 | 1.441142  | 1.434825  |           |

**Table S21.** Cartesian coordinates, optimized geometry, and energies of **Int 2d**

| <b>3-(2-Chloro-6-methoxyquinolin-3-yl)-3-hydroxy-2-(imidazolidin-2-ylidene)-1-phenylpropan-1-one (Int 2d)</b>               |          |           |           |           |
|-----------------------------------------------------------------------------------------------------------------------------|----------|-----------|-----------|-----------|
| $E_{B3LYP}$                                                                                                                 | $E_0$    | $H$       | $TCGFE$   |           |
| -1700.8205993                                                                                                               | 0.384097 | 0.410489  | 0.326885  |           |
| 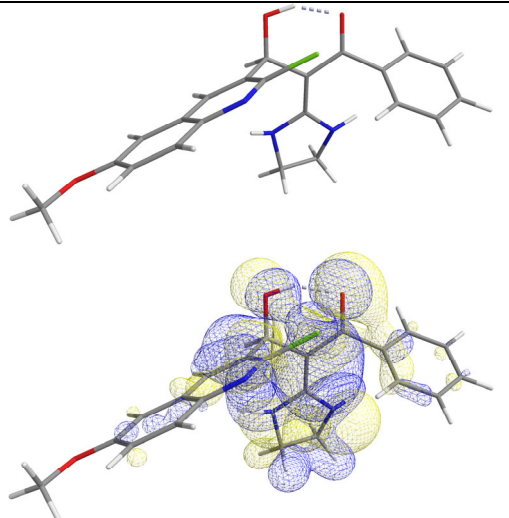 <p style="text-align: center;">HOMO</p> | Atoms    | $x$       | $y$       | $z$       |
|                                                                                                                             | C        | -5.496968 | 0.326352  | -0.215715 |
|                                                                                                                             | C        | -5.413526 | -0.713850 | -1.175444 |
|                                                                                                                             | C        | -4.236944 | -1.408359 | -1.345987 |
|                                                                                                                             | C        | -3.096899 | -1.098680 | -0.574386 |
|                                                                                                                             | C        | -3.181391 | -0.049677 | 0.385687  |
|                                                                                                                             | C        | -4.392619 | 0.648958  | 0.552271  |
|                                                                                                                             | N        | -1.950962 | -1.815428 | -0.755463 |
|                                                                                                                             | C        | -0.835001 | -0.474407 | 0.928834  |
|                                                                                                                             | C        | -2.002278 | 0.224846  | 1.128593  |
|                                                                                                                             | C        | 1.617119  | 1.545747  | 0.426124  |
|                                                                                                                             | C        | 1.638424  | 0.271984  | 0.979305  |
|                                                                                                                             | N        | 2.624001  | 2.242954  | -0.197895 |
|                                                                                                                             | C        | 2.827955  | -0.555864 | 0.987411  |



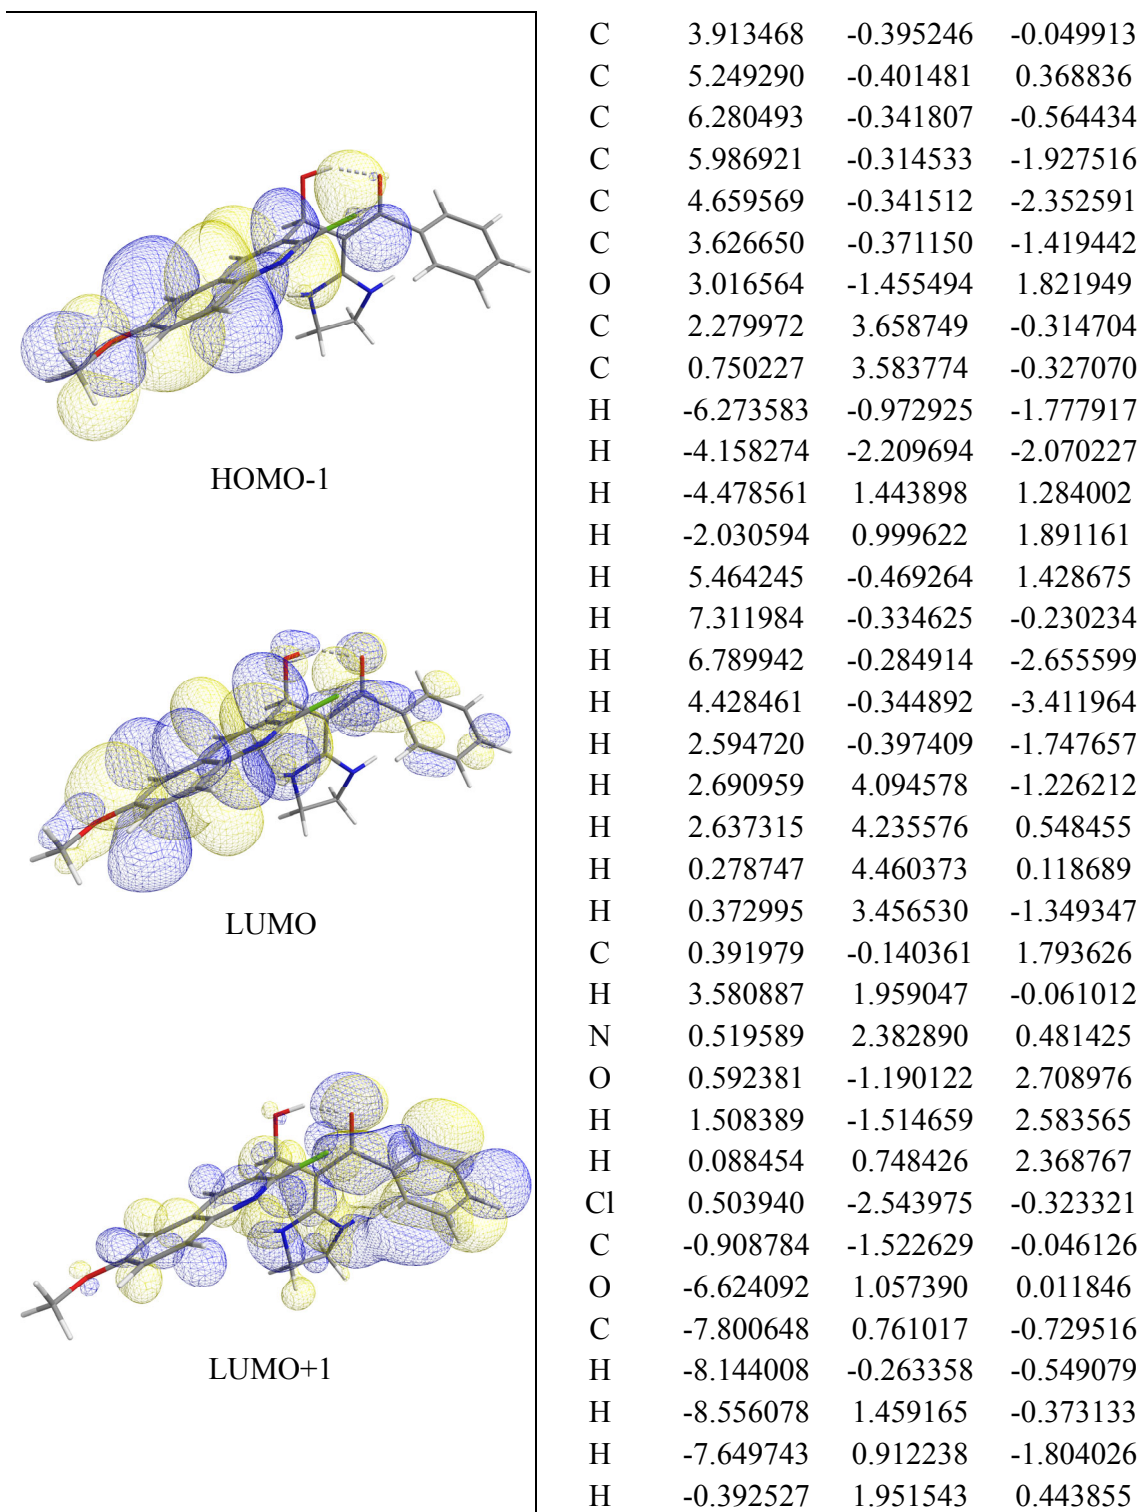

**Table S22.** Cartesian coordinates, optimized geometry, and energies of **Int 2e**

| <b>3-(2-Chloro-6-methoxyquinolin-3-yl)-3-hydroxy-1-phenyl-2-(tetrahydropyrimidin-2(1H)-ylidene)propan-1-one (Int 2e)</b> |          |          |           |           |           |
|--------------------------------------------------------------------------------------------------------------------------|----------|----------|-----------|-----------|-----------|
| $E_{\text{B3LYP}}$                                                                                                       | $E_0$    | $H$      | $TCGFE$   |           |           |
| -1740.1465617                                                                                                            | 0.413817 | 0.441075 | 0.355373  |           |           |
|                                                                                                                          |          | Atoms    | $x$       | $y$       | $z$       |
| 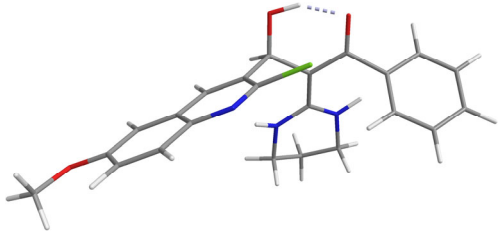                                        |          | C        | -5.574124 | 0.293459  | -0.225993 |
|                                                                                                                          |          | C        | -5.508033 | -0.756482 | -1.176484 |
|                                                                                                                          |          | C        | -4.342204 | -1.469909 | -1.342794 |
|                                                                                                                          |          | C        | -3.196376 | -1.170579 | -0.575564 |
|                                                                                                                          |          | C        | -4.463624 | 0.606737  | 0.536797  |
|                                                                                                                          |          | N        | -2.062005 | -1.906235 | -0.751043 |
|                                                                                                                          |          | C        | -0.922374 | -0.569213 | 0.922322  |
|                                                                                                                          |          | C        | -2.079277 | 0.150914  | 1.113595  |
|                                                                                                                          |          | C        | 1.585155  | 0.129732  | 1.021049  |
|                                                                                                                          |          | C        | 2.706974  | -0.777838 | 1.000895  |
|                                                                                                                          |          | C        | 3.790753  | -0.680647 | -0.052676 |
|                                                                                                                          |          | C        | 5.118765  | -0.899082 | 0.332554  |
|                                                                                                                          |          | C        | 6.138671  | -0.898015 | -0.615202 |
|                                                                                                                          |          | C        | 5.838223  | -0.715411 | -1.964337 |
|                                                                                                                          |          | C        | 4.513836  | -0.532519 | -2.360898 |
|                                                                                                                          |          | C        | 3.496323  | -0.507874 | -1.410657 |
|                                                                                                                          |          | O        | 2.833039  | -1.728296 | 1.795413  |
|                                                                                                                          |          | H        | 5.332458  | -1.084299 | 1.378437  |
|                                                                                                                          |          | H        | 7.165295  | -1.055834 | -0.303805 |
|                                                                                                                          |          | H        | 6.630138  | -0.730456 | -2.704913 |
|                                                                                                                          |          | H        | 4.272546  | -0.420859 | -3.412268 |
|                                                                                                                          |          | H        | 2.464717  | -0.382911 | -1.718015 |
|                                                                                                                          |          | C        | 0.304452  | -0.245028 | 1.799303  |
|                                                                                                                          |          | O        | 0.466023  | -1.278034 | 2.740974  |
|                                                                                                                          |          | H        | 1.348656  | -1.677483 | 2.582460  |
|                                                                                                                          |          | H        | 0.003792  | 0.657443  | 2.353461  |
|                                                                                                                          |          | Cl       | 0.378799  | -2.671571 | -0.314292 |
|                                                                                                                          |          | C        | -1.014380 | -1.624812 | -0.044075 |
|                                                                                                                          |          | C        | -3.263292 | -0.111788 | 0.374817  |
|                                                                                                                          |          | H        | -6.373035 | -1.008294 | -1.774961 |
|                                                                                                                          |          | H        | -4.276772 | -2.278973 | -2.059740 |
|                                                                                                                          |          | H        | -4.536268 | 1.409367  | 1.261548  |
|                                                                                                                          |          | H        | -2.093722 | 0.936292  | 1.865399  |
|                                       | HOMO     |          |           |           |           |
|                                       | HOMO-1   |          |           |           |           |

|                                                                                                 |           |           |           |           |
|-------------------------------------------------------------------------------------------------|-----------|-----------|-----------|-----------|
| 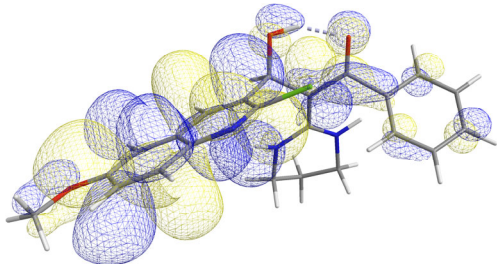 <p>LUMO</p>   | O         | -6.690129 | 1.043276  | -0.003035 |
|                                                                                                 | C         | -7.873502 | 0.754396  | -0.736222 |
|  <p>LUMO+1</p> | H         | -8.229370 | -0.263466 | -0.543461 |
|                                                                                                 | H         | -8.618369 | 1.466045  | -0.384256 |
|                                                                                                 | H         | -7.725474 | 0.892094  | -1.812984 |
|                                                                                                 | C         | 1.659748  | 1.437035  | 0.507736  |
|                                                                                                 | N         | 0.524955  | 2.184284  | 0.355578  |
|                                                                                                 | N         | 2.832804  | 2.082309  | 0.251763  |
|                                                                                                 | C         | 0.463885  | 3.521150  | -0.235621 |
|                                                                                                 | C         | 2.914957  | 3.303469  | -0.537954 |
|                                                                                                 | C         | 1.798908  | 4.243416  | -0.092441 |
|                                                                                                 | H         | 0.200787  | 3.446886  | -1.299564 |
|                                                                                                 | H         | 2.833606  | 3.094126  | -1.614521 |
|                                                                                                 | H         | 1.791332  | 5.153561  | -0.696660 |
|                                                                                                 | H         | 3.674723  | 1.544664  | 0.374830  |
|                                                                                                 | H         | -0.333160 | 1.655639  | 0.317555  |
|                                                                                                 | H         | 3.895787  | 3.748643  | -0.363679 |
|                                                                                                 | H         | 1.964705  | 4.528387  | 0.949996  |
| H                                                                                               | -0.334466 | 4.081396  | 0.258325  |           |

**Table S23.** Cartesian coordinates, optimized geometry, and energies of **Int 2f**

**3-(2-Chloro-6-methoxyquinolin-3-yl)-2-(1,3-diazepan-2-ylidene)-3-hydroxy-1-phenylpropan-1-one (Int 2f)**

| $E_{\text{B3LYP}}$ | $E_0$    | $H$      | $TCGFE$  |
|--------------------|----------|----------|----------|
| -1779.4650962      | 0.442756 | 0.470991 | 0.382768 |

  

| Atoms | $x$       | $y$       | $z$       |
|-------|-----------|-----------|-----------|
| C     | -5.684489 | 0.100770  | 0.116732  |
| C     | -5.622645 | -0.487289 | -1.172080 |
| C     | -4.440983 | -1.018953 | -1.636872 |
| C     | -3.273760 | -0.988228 | -0.844062 |
| C     | -3.336774 | -0.392376 | 0.448170  |
| C     | -4.553701 | 0.144137  | 0.911954  |
| N     | -2.124280 | -1.541883 | -1.323105 |
| C     | -0.962644 | -0.907886 | 0.705870  |
| C     | -2.132311 | -0.382949 | 1.198963  |
| C     | 1.543237  | -0.272656 | 0.937114  |
| C     | 2.813170  | -0.951322 | 1.135696  |
| C     | 4.013893  | -0.735311 | 0.245718  |
| C     | 5.269410  | -0.539173 | 0.833475  |
| C     | 6.408767  | -0.441031 | 0.042427  |
| C     | 6.314158  | -0.576522 | -1.343561 |

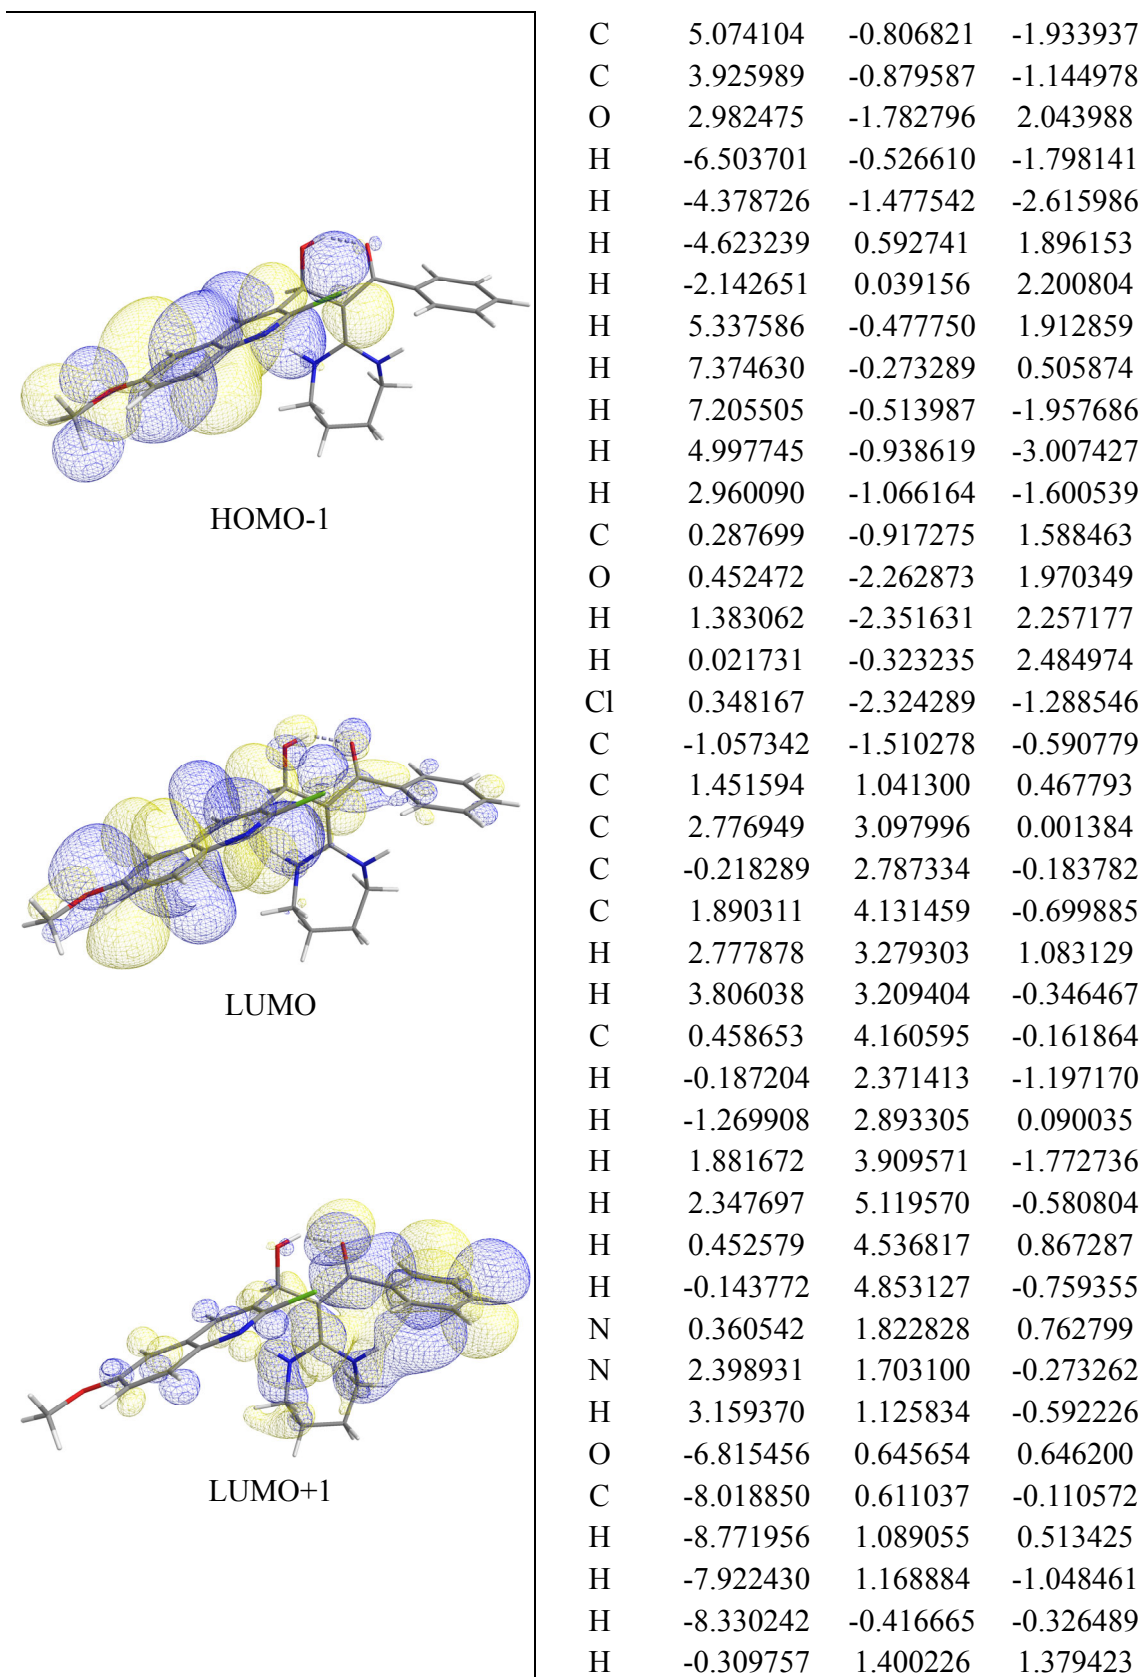

### 3 Crystal X-ray structure and packing diagrams of compound **3k**

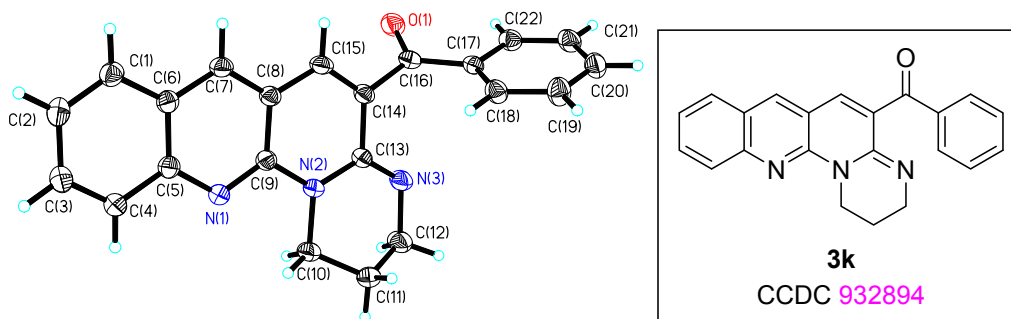

**Fig. S51** ORTEP view of the molecular structure of **3k**,<sup>2</sup>  
thermal ellipsoids are drawn at 30% probability

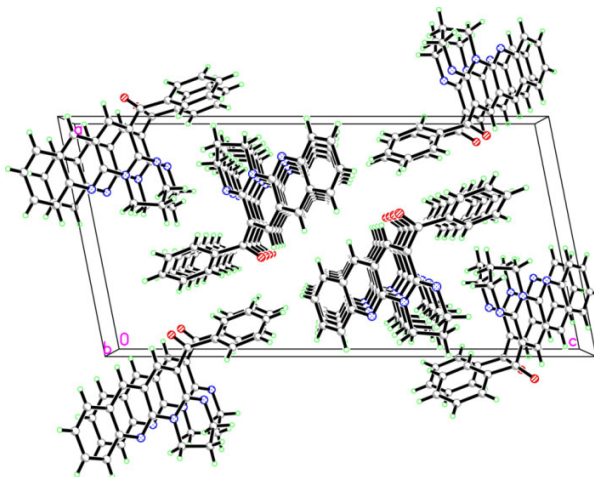

**Fig. S52** Packing in the crystal structure of **3k**, viewed along the *b* axis

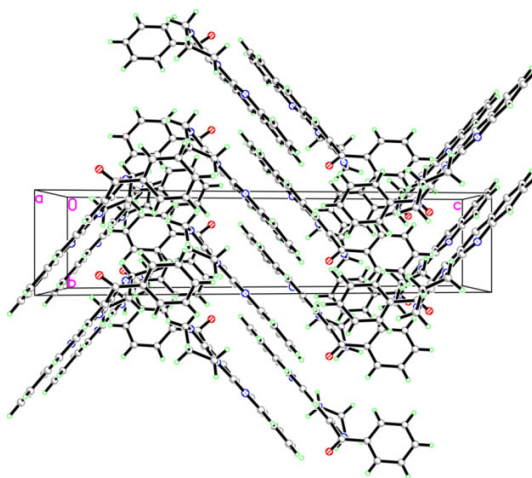

**Fig. S53** Packing in the crystal structure of **3k**, viewed along the *a* axis.

**Table S24.** Crystal data, data collection, and structure refinement for compound **3k**

---

| <b>(2,3-Dihydro-1H-benzo[g]pyrimido[1,2-a][1,8]naphthyridin-5-yl)(phenyl)methanone (3k)</b> |                                                                                          |
|---------------------------------------------------------------------------------------------|------------------------------------------------------------------------------------------|
| <i>Crystal data</i>                                                                         |                                                                                          |
| C <sub>22</sub> H <sub>17</sub> N <sub>3</sub> O                                            | Z = 4                                                                                    |
| M <sub>r</sub> = 339.39                                                                     | F(000) = 712                                                                             |
| Monoclinic, P2 <sub>1</sub> /n                                                              | D <sub>x</sub> = 1.368 Mg m <sup>-3</sup>                                                |
| Hall symbol: -P 2yn                                                                         | Mo Kα radiation, λ = 0.71073 Å                                                           |
| a = 12.3869(16) Å                                                                           | Cell parameters from 1628 reflections                                                    |
| b = 5.4576(7) Å                                                                             | θ = 1.72–24.99°                                                                          |
| c = 24.843(3) Å                                                                             | μ = 0.086 mm <sup>-1</sup>                                                               |
| α = 90°                                                                                     | T = 298(2) K                                                                             |
| β = 101.217(2)°                                                                             | Block, yellow                                                                            |
| γ = 90°                                                                                     | 0.27 × 0.20 × 0.17 mm                                                                    |
| V = 1647.4(4) Å <sup>3</sup>                                                                |                                                                                          |
| <i>Data collection</i>                                                                      |                                                                                          |
| Bruker apex II diffractometer                                                               | 8916 measured reflections                                                                |
| Radiation source: fine-focus sealed tube                                                    | 2901 independent reflections                                                             |
| Graphite monochromator                                                                      | 1992 reflections with I > 2σ(I)                                                          |
| Absorption correction: multi-scan<br>(SADABS; Bruker, 2000)                                 | R <sub>int</sub> = 0.0321                                                                |
| ω scans                                                                                     | θ <sub>max</sub> = 24.99°, θ <sub>min</sub> = 1.72°                                      |
| T <sub>min</sub> = 0.9771, T <sub>max</sub> = 0.9855                                        | h = -14→14                                                                               |
|                                                                                             | k = -5→6                                                                                 |
|                                                                                             | l = -25→29                                                                               |
| <i>Refinement</i>                                                                           |                                                                                          |
| Refinement on F <sup>2</sup>                                                                | Primary atom site location:                                                              |
| Least-squares matrix: full                                                                  | structure-invariant direct methods                                                       |
| R[F <sup>2</sup> > 2σ(F <sup>2</sup> )] = 0.0593                                            | Hydrogen site location: inferred from<br>neighboring sites                               |
| wR(F <sup>2</sup> ) = 0.1190                                                                | w = 1/[σ <sup>2</sup> (F <sub>o</sub> <sup>2</sup> ) + (0.0629P) <sup>2</sup> + 0.2149P] |
| S = 1.062                                                                                   | where P = (F <sub>o</sub> <sup>2</sup> + 2F <sub>c</sub> <sup>2</sup> )/3                |
| 2901 reflections                                                                            | (Δ/σ) <sub>max</sub> < 0.001                                                             |
| 236 parameters                                                                              | Δρ <sub>max</sub> = 0.160 e Å <sup>-3</sup>                                              |
| 0 restraints                                                                                | Δρ <sub>min</sub> = -0.157 e Å <sup>-3</sup>                                             |

---

**Table S25.** Geometric parameters of compound **3k**

---

| <i>Bond lengths (Å)</i> |            |                     |            |
|-------------------------|------------|---------------------|------------|
| N(1)-C(9)               | 1.314(2)   | C(10)-H(10A)        | 0.9700     |
| N(1)-C(5)               | 1.372(3)   | C(10)-H(10B)        | 0.9700     |
| N(2)-C(9)               | 1.395(2)   | C(11)-C(12)         | 1.497(3)   |
| N(2)-C(13)              | 1.408(2)   | C(11)-H(11A)        | 0.9700     |
| N(2)-C(10)              | 1.470(2)   | C(11)-H(11B)        | 0.9700     |
| N(3)-C(13)              | 1.279(2)   | C(12)-H(12A)        | 0.9700     |
| N(3)-C(12)              | 1.462(3)   | C(12)-H(12B)        | 0.9700     |
| O(1)-C(16)              | 1.225(2)   | C(13)-C(14)         | 1.472(3)   |
| C(1)-C(2)               | 1.358(3)   | C(14)-C(15)         | 1.344(3)   |
| C(1)-C(6)               | 1.411(3)   | C(14)-C(16)         | 1.509(3)   |
| C(1)-H(1)               | 0.9300     | C(15)-H(15)         | 0.9300     |
| C(2)-C(3)               | 1.401(3)   | C(16)-C(17)         | 1.481(3)   |
| C(2)-H(2)               | 0.9300     | C(17)-C(18)         | 1.380(3)   |
| C(3)-C(4)               | 1.362(3)   | C(17)-C(22)         | 1.388(3)   |
| C(3)-H(3)               | 0.9300     | C(18)-C(19)         | 1.380(3)   |
| C(4)-C(5)               | 1.406(3)   | C(18)-H(18)         | 0.9300     |
| C(4)-H(4)               | 0.9300     | C(19)-C(20)         | 1.373(3)   |
| C(5)-C(6)               | 1.416(3)   | C(19)-H(19)         | 0.9300     |
| C(6)-C(7)               | 1.409(3)   | C(20)-C(21)         | 1.382(3)   |
| C(7)-C(8)               | 1.370(3)   | C(20)-H(20)         | 0.9300     |
| C(7)-H(7)               | 0.9300     | C(21)-C(22)         | 1.372(3)   |
| C(8)-C(9)               | 1.427(3)   | C(21)-H(21)         | 0.9300     |
| C(8)-C(15)              | 1.434(3)   | C(22)-H(22)         | 0.9300     |
| C(10)-C(11)             | 1.495(3)   |                     |            |
| <i>Bond angles (°)</i>  |            |                     |            |
| C(9)-N(1)-C(5)          | 117.73(16) | C(12)-C(11)-H(11A)  | 109.7      |
| C(9)-N(2)-C(13)         | 123.76(16) | C(10)-C(11)-H(11B)  | 109.7      |
| C(9)-N(2)-C(10)         | 118.24(16) | C(12)-C(11)-H(11B)  | 109.7      |
| C(13)-N(2)-C(10)        | 117.82(16) | H(11A)-C(11)-H(11B) | 108.2      |
| C(13)-N(3)-C(12)        | 118.56(18) | N(3)-C(12)-C(11)    | 113.62(19) |
| C(2)-C(1)-C(6)          | 121.0(2)   | N(3)-C(12)-H(12A)   | 108.8      |
| C(2)-C(1)-H(1)          | 119.5      | C(11)-C(12)-H(12A)  | 108.8      |
| C(6)-C(1)-H(1)          | 119.5      | N(3)-C(12)-H(12B)   | 108.8      |
| C(1)-C(2)-C(3)          | 119.7(2)   | C(11)-C(12)-H(12B)  | 108.8      |

---

|                     |            |                     |            |
|---------------------|------------|---------------------|------------|
| C(1)-C(2)-H(2)      | 120.2      | H(12A)-C(12)-H(12B) | 107.7      |
| C(3)-C(2)-H(2)      | 120.2      | N(3)-C(13)-N(2)     | 125.75(17) |
| C(4)-C(3)-C(2)      | 121.1(2)   | N(3)-C(13)-C(14)    | 118.23(18) |
| C(4)-C(3)-H(3)      | 119.5      | N(2)-C(13)-C(14)    | 116.00(17) |
| C(2)-C(3)-H(3)      | 119.5      | C(15)-C(14)-C(13)   | 120.98(18) |
| C(3)-C(4)-C(5)      | 120.5(2)   | C(15)-C(14)-C(16)   | 119.37(17) |
| C(3)-C(4)-H(4)      | 119.8      | C(13)-C(14)-C(16)   | 119.45(17) |
| C(5)-C(4)-H(4)      | 119.8      | C(14)-C(15)-C(8)    | 121.90(18) |
| N(1)-C(5)-C(4)      | 118.61(18) | C(14)-C(15)-H(15)   | 119.1      |
| N(1)-C(5)-C(6)      | 122.69(18) | C(8)-C(15)-H(15)    | 119.1      |
| C(4)-C(5)-C(6)      | 118.69(19) | O(1)-C(16)-C(17)    | 120.50(18) |
| C(1)-C(6)-C(7)      | 123.84(18) | O(1)-C(16)-C(14)    | 117.25(19) |
| C(1)-C(6)-C(5)      | 119.08(19) | C(17)-C(16)-C(14)   | 122.00(17) |
| C(7)-C(6)-C(5)      | 117.07(18) | C(18)-C(17)-C(22)   | 119.49(19) |
| C(8)-C(7)-C(6)      | 120.81(18) | C(18)-C(17)-C(16)   | 121.76(18) |
| C(8)-C(7)-H(7)      | 119.6      | C(22)-C(17)-C(16)   | 118.58(18) |
| C(6)-C(7)-H(7)      | 119.6      | C(19)-C(18)-C(17)   | 119.7(2)   |
| C(7)-C(8)-C(9)      | 117.38(18) | C(19)-C(18)-H(18)   | 120.1      |
| C(7)-C(8)-C(15)     | 123.81(18) | C(17)-C(18)-H(18)   | 120.1      |
| C(9)-C(8)-C(15)     | 118.79(18) | C(20)-C(19)-C(18)   | 120.7(2)   |
| N(1)-C(9)-N(2)      | 117.26(16) | C(20)-C(19)-H(19)   | 119.6      |
| N(1)-C(9)-C(8)      | 124.29(18) | C(18)-C(19)-H(19)   | 119.6      |
| N(2)-C(9)-C(8)      | 118.45(17) | C(19)-C(20)-C(21)   | 119.6(2)   |
| N(2)-C(10)-C(11)    | 110.14(17) | C(19)-C(20)-H(20)   | 120.2      |
| N(2)-C(10)-H(10A)   | 109.6      | C(21)-C(20)-H(20)   | 120.2      |
| C(11)-C(10)-H(10A)  | 109.6      | C(22)-C(21)-C(20)   | 120.1(2)   |
| N(2)-C(10)-H(10B)   | 109.6      | C(22)-C(21)-H(21)   | 119.9      |
| C(11)-C(10)-H(10B)  | 109.6      | C(20)-C(21)-H(21)   | 119.9      |
| H(10A)-C(10)-H(10B) | 108.1      | C(21)-C(22)-C(17)   | 120.3(2)   |
| C(10)-C(11)-C(12)   | 109.88(19) | C(21)-C(22)-H(22)   | 119.8      |
| C(10)-C(11)-H(11A)  | 109.7      | C(17)-C(22)-H(22)   | 119.8      |

*Torsion angles (°)*

|                     |             |                        |            |
|---------------------|-------------|------------------------|------------|
| C(6)-C(1)-C(2)-C(3) | -0.9(3)     | C(10)-C(11)-C(12)-N(3) | 51.5(3)    |
| C(1)-C(2)-C(3)-C(4) | -0.6(3)     | C(12)-N(3)-C(13)-N(2)  | -3.1(3)    |
| C(2)-C(3)-C(4)-C(5) | 2.0(3)      | C(12)-N(3)-C(13)-C(14) | 178.6(2)   |
| C(9)-N(1)-C(5)-C(4) | -178.82(18) | C(9)-N(2)-C(13)-N(3)   | -175.6(2)  |
| C(9)-N(1)-C(5)-C(6) | 0.2(3)      | C(10)-N(2)-C(13)-N(3)  | -0.6(3)    |
| C(3)-C(4)-C(5)-N(1) | 177.0(2)    | C(9)-N(2)-C(13)-C(14)  | 2.7(3)     |
| C(3)-C(4)-C(5)-C(6) | -2.1(3)     | C(10)-N(2)-C(13)-C(14) | 177.75(17) |



---

|                        |             |                         |             |
|------------------------|-------------|-------------------------|-------------|
| C(2)-C(1)-C(6)-C(7)    | -178.4(2)   | N(3)-C(13)-C(14)-C(15)  | 178.5(2)    |
| C(2)-C(1)-C(6)-C(5)    | 0.8(3)      | N(2)-C(13)-C(14)-C(15)  | 0.1(3)      |
| N(1)-C(5)-C(6)-C(1)    | -178.31(19) | N(3)-C(13)-C(14)-C(16)  | 3.6(3)      |
| C(4)-C(5)-C(6)-C(1)    | 0.7(3)      | N(2)-C(13)-C(14)-C(16)  | -174.85(17) |
| N(1)-C(5)-C(6)-C(7)    | 0.9(3)      | C(13)-C(14)-C(15)-C(8)  | -1.0(3)     |
| C(4)-C(5)-C(6)-C(7)    | 179.91(18)  | C(16)-C(14)-C(15)-C(8)  | 173.94(17)  |
| C(1)-C(6)-C(7)-C(8)    | 178.53(19)  | C(7)-C(8)-C(15)-C(14)   | -179.0(2)   |
| C(5)-C(6)-C(7)-C(8)    | -0.7(3)     | C(9)-C(8)-C(15)-C(14)   | -0.7(3)     |
| C(6)-C(7)-C(8)-C(9)    | -0.6(3)     | C(15)-C(14)-C(16)-O(1)  | -56.0(3)    |
| C(6)-C(7)-C(8)-C(15)   | 177.71(18)  | C(13)-C(14)-C(16)-O(1)  | 119.0(2)    |
| C(5)-N(1)-C(9)-N(2)    | 178.57(17)  | C(15)-C(14)-C(16)-C(17) | 118.2(2)    |
| C(5)-N(1)-C(9)-C(8)    | -1.6(3)     | C(13)-C(14)-C(16)-C(17) | -66.8(2)    |
| C(13)-N(2)-C(9)-N(1)   | 175.48(17)  | O(1)-C(16)-C(17)-C(18)  | 159.20(19)  |
| C(10)-N(2)-C(9)-N(1)   | 0.4(3)      | C(14)-C(16)-C(17)-C(18) | -14.9(3)    |
| C(13)-N(2)-C(9)-C(8)   | -4.4(3)     | O(1)-C(16)-C(17)-C(22)  | -16.0(3)    |
| C(10)-N(2)-C(9)-C(8)   | -179.44(18) | C(14)-C(16)-C(17)-C(22) | 169.89(17)  |
| C(7)-C(8)-C(9)-N(1)    | 1.8(3)      | C(22)-C(17)-C(18)-C(19) | 0.6(3)      |
| C(15)-C(8)-C(9)-N(1)   | -176.57(19) | C(16)-C(17)-C(18)-C(19) | -174.61(19) |
| C(7)-C(8)-C(9)-N(2)    | -178.35(18) | C(17)-C(18)-C(19)-C(20) | -0.8(3)     |
| C(15)-C(8)-C(9)-N(2)   | 3.3(3)      | C(18)-C(19)-C(20)-C(21) | -0.1(3)     |
| C(9)-N(2)-C(10)-C(11)  | -154.99(19) | C(19)-C(20)-C(21)-C(22) | 1.2(3)      |
| C(13)-N(2)-C(10)-C(11) | 29.7(3)     | C(20)-C(21)-C(22)-C(17) | -1.4(3)     |
| N(2)-C(10)-C(11)-C(12) | -53.4(2)    | C(18)-C(17)-C(22)-C(21) | 0.5(3)      |
| C(13)-N(3)-C(12)-C(11) | -23.3(3)    | C(16)-C(17)-C(22)-C(21) | 175.86(19)  |

---

#### 4 Notes and References

- (1) Full reference (22) for Gaussian03: M. J. Frisch, G. W. Trucks, H. B. Schlegel, G. E. Scuseria, M. A. Robb, J. R. Cheeseman, J. A. Montgomery, Jr., T. Vreven, K. N. Kudin, J. C. Burant, J. M. Millam, S. S. Iyengar, J. Tomasi, V. Barone, B. Mennucci, M. Cossi, G. Scalmani, N. Rega, G. A. Petersson, H. Nakatsuji, M. Hada, M. Ehara, K. Toyota, R. Fukuda, J. Hasegawa, M. Ishida, T. Nakajima, Y. Honda, O. Kitao, H. Nakai, M. Klene, X. Li, J. E. Knox, H. P. Hratchian, J. B. Cross, V. Bakken, C. Adamo, J. Jaramillo, R. Gomperts, R. E. Stratmann, O. Yazyev, A. J. Austin, R. Cammi, C. Pomelli, J. W. Ochterski, P. Y. Ayala, K. Morokuma, G. A. Voth, P. Salvador, J. J. Dannenberg, V. G. Zakrzewski, S. Dapprich, A. D. Daniels, M. C. Strain, O. Farkas, D. K. Malick, A. D. Rabuck, K. Raghavachari, J. B. Foresman, J. V. Ortiz, Q. Cui, A. G. Baboul, S. Clifford, J. Cioslowski, B. B. Stefanov, G. Liu, A. Liashenko, P. Piskorz, I. Komaromi, R. L. Martin, D. J. Fox, T. Keith, M. A. Al-Laham, C. Y. Peng, A. Nanayakkara, M. Challacombe, P. M. W. Gill, B. Johnson, W. Chen, M. W. Wong, C. Gonzalez and J. A. Pople, *Gaussian03, Revision D.01*, Gaussian, Inc., Wallingford CT, 2004.
- (2) CCDC 932894 which containing in the electronic supplementary information (ESI) for crystallographic data of compound **3k**. This material is available free of charge from The Cambridge Crystallographic Data Center *via* the Internet at [www.ccdc.cam.ac.uk/data\\_request/cif](http://www.ccdc.cam.ac.uk/data_request/cif).
